# Supplementary material for: Detecting Local Adaptation between North and South European Atlantic Salmon Populations
Source: MDPI journal article supplement (doi:10.3390/biology11060933), 2022-06-19
Supplement: s1 [file s1]

# DETECTING LOCAL ADAPTATION BETWEEN NORTH AND SOUTH EUROPEAN ATLANTIC SALMON POPULATIONS

María Gabián<sup>1</sup>, Paloma Morán<sup>1</sup>, María Saura<sup>2</sup>, Antonio Carvajal-Rodríguez<sup>1\*</sup>

<sup>1</sup>Centro de Investigación Mariña (CIM), Departamento de Bioquímica, Genética e Inmunología, Universidade de Vigo, Vigo, Spain

<sup>2</sup>Departamento de Mejora Genética Animal, Instituto Nacional de Investigación y Tecnología Agraria y Alimentaria (INIA-CSIC), Madrid, Spain

\* Corresponding author

E-mail: [acraaj@uvigo.es](mailto:acraaj@uvigo.es)

## Supplementary tables

**Table S1.** Significant SNPs for at least two haplotype-based methods. ID: identifier. Chrom: chromosome. Atlantic & Cantabric - Scotland: indicates that both Atlantic-Scotland and Cantabric-Scotland comparisons were significant for the SNP.

| ID   | Chrom        | SNP                       | Position   | Comparison           |
|------|--------------|---------------------------|------------|----------------------|
| H001 | <i>Ssa01</i> | ctg7180001694954_3432_SAG | 20,820,778 | Cantabric - Scotland |
| H002 | <i>Ssa01</i> | ctg7180001855312_1515_SAC | 20,843,008 | Cantabric - Scotland |
| H003 | <i>Ssa01</i> | ctg7180001855312_1346_SCT | 20,843,177 | Cantabric - Scotland |
| H004 | <i>Ssa01</i> | ctg7180001855312_531_SCT  | 20,843,992 | Cantabric - Scotland |
| H005 | <i>Ssa01</i> | ctg7180001307194_7323_SAC | 20,846,500 | Cantabric - Scotland |
| H006 | <i>Ssa01</i> | ctg7180001307194_6055_SAG | 20,847,768 | Cantabric - Scotland |
| H007 | <i>Ssa01</i> | ctg7180001307194_5625_SCT | 20,848,198 | Cantabric - Scotland |
| H008 | <i>Ssa01</i> | ctg7180001307194_5603_SCT | 20,848,220 | Cantabric - Scotland |
| H009 | <i>Ssa01</i> | ctg7180001307194_4028     | 20,848,661 | Cantabric - Scotland |
| H010 | <i>Ssa01</i> | ctg7180001851537_3635_SAG | 48,285,188 | Cantabric - Scotland |
| H011 | <i>Ssa01</i> | ctg7180001851537_8799_SAG | 48,290,352 | Cantabric - Scotland |
| H012 | <i>Ssa01</i> | ctg7180001756285_1481_SAC | 48,568,283 | Atlantic - Scotland  |
| H013 | <i>Ssa01</i> | ctg7180001912826_424_SCT  | 48,631,908 | Atlantic - Scotland  |
| H014 | <i>Ssa01</i> | ctg7180001909402_1529_SCT | 48,634,126 | Atlantic - Scotland  |
| H015 | <i>Ssa01</i> | ctg7180001909402_6720_SAG | 48,639,317 | Atlantic - Scotland  |
| H016 | <i>Ssa01</i> | ctg7180001909402_7221_SAC | 48,639,818 | Atlantic - Scotland  |
| H017 | <i>Ssa01</i> | ctg7180001367958_2782_SGT | 48,642,864 | Atlantic - Scotland  |

|      |       |                            |             |                                |
|------|-------|----------------------------|-------------|--------------------------------|
| H018 | Ssa01 | ctg7180001875704_3999_SAG  | 93,514,867  | Atlantic - Scotland            |
| H019 | Ssa01 | ctg7180001875704_3788_SCT  | 93,515,078  | Atlantic - Scotland            |
| H020 | Ssa01 | ctg7180001875704_1783_SAG  | 93,517,083  | Atlantic - Scotland            |
| H021 | Ssa01 | ctg7180001904381_6727_SAC  | 93,536,713  | Atlantic - Scotland            |
| H022 | Ssa01 | ctg7180001904381_3866_SAG  | 93,539,574  | Atlantic - Scotland            |
| H023 | Ssa01 | ctg7180001865646_9569_SAG  | 93,553,517  | Atlantic - Scotland            |
| H024 | Ssa01 | ctg7180001844605_1872_SCT  | 118,396,349 | Cantabric - Scotland           |
| H025 | Ssa01 | ctg7180001813606_1744_SAC  | 127,089,824 | Atlantic - Scotland            |
| H026 | Ssa01 | ctg7180001625892_282_SGT   | 130,368,540 | Cantabric - Scotland           |
| H027 | Ssa01 | ctg7180001490210_13171_SAG | 130,590,068 | Cantabric - Scotland           |
| H028 | Ssa01 | ctg7180001490210_11991_SGT | 130,591,248 | Cantabric - Scotland           |
| H029 | Ssa01 | ctg7180001530551_6000_SAG  | 147,026,514 | Atlantic& Cantabric - Scotland |
| H030 | Ssa01 | ctg7180001933038_21577_SCT | 147,055,027 | Atlantic - Scotland            |
| H031 | Ssa01 | ctg7180001933038_27729_SAG | 147,061,179 | Atlantic - Scotland            |
| H032 | Ssa01 | ctg7180001394286_776_SAG   | 147,073,967 | Atlantic - Scotland            |
| H033 | Ssa03 | ctg7180001838466_446_SGT   | 15,060,009  | Cantabric - Scotland           |
| H034 | Ssa03 | ctg7180001838466_3126_SAG  | 15,062,689  | Cantabric - Scotland           |
| H035 | Ssa03 | ctg7180001838466_3184_SCT  | 15,062,747  | Cantabric - Scotland           |
| H036 | Ssa03 | ctg7180001838466_4593_SAG  | 15,064,156  | Cantabric - Scotland           |
| H037 | Ssa03 | ctg7180001537731_370_SAG   | 20,144,561  | Atlantic - Scotland            |
| H038 | Ssa03 | ctg7180001865890_80_SAC    | 56,586,907  | Cantabric - Scotland           |
| H039 | Ssa03 | ctg7180001681735_1954_SCT  | 56,928,284  | Cantabric - Scotland           |
| H040 | Ssa03 | ctg7180001653564_9841_SGT  | 60,822,757  | Atlantic - Cantabric           |
| H041 | Ssa03 | ctg7180001653564_9258_SAG  | 60,823,340  | Atlantic - Cantabric           |
| H042 | Ssa03 | ctg7180001653564_9122_SAC  | 60,823,476  | Atlantic - Cantabric           |
| H043 | Ssa03 | ctg7180001653564_3546_SAG  | 60,829,052  | Atlantic - Cantabric           |
| H044 | Ssa03 | ctg7180001911562_17971_SCT | 61,627,534  | Atlantic - Scotland            |
| H045 | Ssa03 | ctg7180001911562_34059_SAG | 61,646,162  | Atlantic - Scotland            |
| H046 | Ssa03 | ctg7180001598832_173_SCT   | 61,649,139  | Atlantic - Scotland            |
| H047 | Ssa03 | ctg7180001727325_1273_SCT  | 61,680,439  | Atlantic - Scotland            |
| H048 | Ssa03 | ctg7180001810694_6823_SCT  | 61,682,427  | Atlantic - Scotland            |
| H049 | Ssa03 | ctg7180001810694_1839_SAG  | 61,687,412  | Atlantic - Scotland            |
| H050 | Ssa03 | ctg7180001810694_1828_SCT  | 61,687,423  | Atlantic - Scotland            |
| H051 | Ssa03 | ctg7180001895507_1301_SAC  | 77,261,393  | Cantabric - Scotland           |
| H052 | Ssa04 | ctg7180001387971_2101_SAG  | 28,448,343  | Atlantic - Scotland            |
| H053 | Ssa04 | ctg7180001387971_5254_SCT  | 28,451,496  | Atlantic - Scotland            |
| H054 | Ssa04 | ctg7180001387971_5642_SGT  | 28,451,884  | Atlantic - Scotland            |
| H055 | Ssa04 | ctg7180001276135_397_SAG   | 28,602,887  | Atlantic - Scotland            |
| H056 | Ssa04 | ctg7180001917074_5769_SAC  | 28,610,395  | Atlantic - Scotland            |
| H057 | Ssa04 | ctg7180001917074_6404_SCT  | 28,611,030  | Atlantic - Scotland            |
| H058 | Ssa04 | ctg7180001801401_7471_SAG  | 28,618,235  | Atlantic - Scotland            |
| H059 | Ssa04 | ctg7180001568011_222_SAG   | 28,638,139  | Atlantic - Scotland            |
| H060 | Ssa04 | ctg7180001568011_9272_SAC  | 28,647,189  | Atlantic& Cantabric - Scotland |
| H061 | Ssa04 | ctg7180001568011_9346_SCT  | 28,647,263  | Atlantic - Scotland            |
| H062 | Ssa04 | ctg7180001568011_9651_SCT  | 28,647,568  | Atlantic - Scotland            |
| H063 | Ssa04 | ctg7180001568011_14270_SCT | 28,652,185  | Atlantic - Scotland            |
| H064 | Ssa04 | ctg7180001920093_1352_SGT  | 28,755,770  | Atlantic - Scotland            |
| H065 | Ssa04 | ctg7180001865186_142_SAC   | 28,757,527  | Atlantic - Scotland            |
| H066 | Ssa04 | ctg7180001909538_7926_SAC  | 52,559,799  | Cantabric - Scotland           |

|      |       |                            |            |                      |
|------|-------|----------------------------|------------|----------------------|
| H067 | Ssa04 | ctg7180001795621_4418_SCT  | 52,585,875 | Cantabric - Scotland |
| H068 | Ssa04 | ctg7180001633401_1478_SGT  | 52,605,677 | Cantabric - Scotland |
| H069 | Ssa04 | ctg7180001893589_2329_SCT  | 52,632,276 | Cantabric - Scotland |
| H070 | Ssa04 | ctg7180001893589_2013_SAG  | 52,632,592 | Cantabric - Scotland |
| H071 | Ssa04 | ctg7180001816477_4904_SCT  | 52,638,293 | Cantabric - Scotland |
| H072 | Ssa04 | ctg7180001892043_5580_SCT  | 52,652,296 | Cantabric - Scotland |
| H073 | Ssa04 | ctg7180001890283_8200_SGT  | 52,666,275 | Cantabric - Scotland |
| H074 | Ssa04 | ctg7180001890283_5650_SAC  | 52,668,825 | Cantabric - Scotland |
| H075 | Ssa04 | ctg7180001824917_5648_SAG  | 52,678,112 | Cantabric - Scotland |
| H076 | Ssa04 | ctg7180001824917_5232_SGT  | 52,678,528 | Cantabric - Scotland |
| H077 | Ssa04 | ctg7180001824917_2581_SAC  | 52,681,177 | Cantabric - Scotland |
| H078 | Ssa04 | ctg7180001890282_769_SAC   | 52,684,592 | Cantabric - Scotland |
| H079 | Ssa04 | ctg7180001853453_2406_SAG  | 52,704,419 | Cantabric - Scotland |
| H080 | Ssa04 | ctg7180001853453_6019_SAC  | 52,708,032 | Cantabric - Scotland |
| H081 | Ssa04 | ctg7180001853453_11003_SAC | 52,713,016 | Cantabric - Scotland |
| H082 | Ssa04 | ctg7180001918676_10351_SAG | 52,726,215 | Cantabric - Scotland |
| H083 | Ssa04 | ctg7180001918676_9172_SGT  | 52,727,394 | Cantabric - Scotland |
| H084 | Ssa04 | ctg7180001458299_1305_SGT  | 52,731,200 | Cantabric - Scotland |
| H085 | Ssa04 | ctg7180001753634_1416_SAC  | 52,736,270 | Cantabric - Scotland |
| H086 | Ssa04 | ctg7180001837716_2396_SGT  | 52,749,831 | Cantabric - Scotland |
| H087 | Ssa04 | ctg7180001837716_3457_SAG  | 52,750,892 | Cantabric - Scotland |
| H088 | Ssa04 | ctg7180001680513_4742_SCT  | 52,766,975 | Cantabric - Scotland |
| H089 | Ssa04 | ctg7180001680513_4824_SCT  | 52,767,091 | Cantabric - Scotland |
| H090 | Ssa04 | ctg7180001431941_7734_SCT  | 52,775,443 | Cantabric - Scotland |
| H091 | Ssa04 | ctg7180001794891_10015_SCT | 52,849,579 | Cantabric - Scotland |
| H092 | Ssa04 | ctg7180001794891_6775_SAG  | 52,852,819 | Cantabric - Scotland |
| H093 | Ssa04 | ctg7180001794891_6036_SCT  | 52,853,558 | Cantabric - Scotland |
| H094 | Ssa04 | ctg7180001786383_967_SAG   | 52,919,870 | Cantabric - Scotland |
| H095 | Ssa04 | ctg7180001858457_3878_SAC  | 57,316,242 | Cantabric - Scotland |
| H096 | Ssa05 | ctg7180001872301_13800_SAC | 25,962,680 | Atlantic - Scotland  |
| H097 | Ssa05 | ctg7180001872301_13812_SCT | 25,962,692 | Atlantic - Scotland  |
| H098 | Ssa05 | ctg7180001872301_13976_SCT | 25,962,856 | Atlantic - Scotland  |
| H099 | Ssa05 | ctg7180001872301_15824_SGT | 25,964,704 | Atlantic - Scotland  |
| H100 | Ssa05 | ctg7180001872301_18965_SAC | 25,967,845 | Atlantic - Scotland  |
| H101 | Ssa05 | ctg7180001872301_19123_SAG | 25,968,003 | Atlantic - Scotland  |
| H102 | Ssa05 | ctg7180001872301_19404_SGT | 25,968,284 | Atlantic - Scotland  |
| H103 | Ssa05 | ctg7180001872301_19936_SAC | 25,968,816 | Atlantic - Scotland  |
| H104 | Ssa05 | ctg7180001574774_983_SAC   | 26,081,452 | Atlantic - Scotland  |
| H105 | Ssa06 | ctg7180001865390_52593_SAG | 57,524,001 | Atlantic - Scotland  |
| H106 | Ssa06 | ctg7180001865390_52072_SAC | 57,524,522 | Atlantic - Scotland  |
| H107 | Ssa06 | ctg7180001865390_6152_SCT  | 57,571,314 | Atlantic - Scotland  |
| H108 | Ssa06 | ctg7180001865390_2479_SAC  | 57,574,987 | Atlantic - Scotland  |
| H109 | Ssa06 | ctg7180001825142_991_SAG   | 57,586,584 | Atlantic - Scotland  |
| H110 | Ssa06 | ctg7180001825142_544_SGT   | 57,587,031 | Atlantic - Scotland  |
| H111 | Ssa06 | ctg7180001935321_1356_SAC  | 57,591,328 | Atlantic - Scotland  |
| H112 | Ssa06 | ctg7180001935321_4281_SGT  | 57,594,253 | Atlantic - Scotland  |
| H113 | Ssa06 | ctg7180001935321_5752_SAG  | 57,595,724 | Atlantic - Scotland  |
| H114 | Ssa06 | ctg7180001935321_5802_SCT  | 57,595,774 | Atlantic - Scotland  |
| H115 | Ssa06 | ctg7180001935321_6272_SGT  | 57,596,244 | Atlantic - Scotland  |

|      |       |                            |            |                                |
|------|-------|----------------------------|------------|--------------------------------|
| H116 | Ssa07 | ctg7180001871459_3867_SGT  | 42,784,225 | Atlantic - Scotland            |
| H117 | Ssa07 | ctg7180001893245_2087_SAG  | 43,185,946 | Atlantic& Cantabrig - Scotland |
| H118 | Ssa07 | ctg7180001672219_4481_SAC  | 43,264,460 | Atlantic - Scotland            |
| H119 | Ssa07 | ctg7180001672219_5520_SCT  | 43,265,499 | Atlantic - Scotland            |
| H120 | Ssa07 | ctg7180001672219_5995_SAC  | 43,265,974 | Atlantic - Scotland            |
| H121 | Ssa07 | ctg7180001672219_6240_SGT  | 43,266,219 | Atlantic - Scotland            |
| H122 | Ssa07 | ctg7180001672219_6301_SAC  | 43,266,280 | Atlantic - Scotland            |
| H123 | Ssa07 | ctg7180001672219_6390_SCT  | 43,266,369 | Atlantic - Scotland            |
| H124 | Ssa07 | ctg7180001672219_6510_SAC  | 43,266,489 | Atlantic& Cantabrig - Scotland |
| H125 | Ssa07 | ctg7180001793746_8564_SAC  | 43,371,429 | Atlantic - Scotland            |
| H126 | Ssa07 | ctg7180001826079_3087_SGT  | 43,405,455 | Atlantic - Scotland            |
| H127 | Ssa07 | ctg7180001805184_4596_SCT  | 43,498,942 | Atlantic - Scotland            |
| H128 | Ssa07 | ctg7180001805184_4532_SCT  | 43,499,006 | Atlantic - Scotland            |
| H129 | Ssa07 | ctg7180001805184_4434_SAC  | 43,499,104 | Atlantic - Scotland            |
| H130 | Ssa07 | ctg7180001838980_4508_SAG  | 43,508,161 | Atlantic - Scotland            |
| H131 | Ssa07 | ctg7180001838980_4339_SAG  | 43,508,330 | Atlantic - Scotland            |
| H132 | Ssa07 | ctg7180001624097_4181_SGT  | 43,592,260 | Atlantic - Scotland            |
| H133 | Ssa07 | ctg7180001915467_2618_SGT  | 43,682,168 | Atlantic - Scotland            |
| H134 | Ssa07 | ctg7180001923514_7991_SAC  | 43,760,760 | Cantabrig - Scotland           |
| H135 | Ssa08 | ctg7180001885288_8610_SAC  | 5,949,717  | Cantabrig - Scotland           |
| H136 | Ssa09 | ctg7180001337954_175_SAG   | 32,533,654 | Atlantic - Scotland            |
| H137 | Ssa09 | ctg7180001703712_449_SAC   | 32,606,736 | Atlantic - Scotland            |
| H138 | Ssa09 | ctg7180001619872_240_SCT   | 53,067,170 | Atlantic - Scotland            |
| H139 | Ssa09 | ctg7180001887817_4712_SAG  | 53,483,285 | Atlantic - Scotland            |
| H140 | Ssa09 | ctg7180001794200_7623_SAG  | 53,664,357 | Atlantic - Scotland            |
| H141 | Ssa09 | ctg7180001794200_7660_SAG  | 53,664,394 | Atlantic - Scotland            |
| H142 | Ssa09 | ctg7180001740047_2126_SCT  | 53,677,948 | Atlantic - Scotland            |
| H143 | Ssa09 | ctg7180001720194_1426_SCT  | 58,184,143 | Atlantic - Scotland            |
| H144 | Ssa09 | ctg7180001848662_1098_SCT  | 58,193,464 | Atlantic - Scotland            |
| H145 | Ssa09 | ctg7180001848663_157_SAG   | 58,195,011 | Atlantic - Scotland            |
| H146 | Ssa09 | ctg7180001848663_584_SAG   | 58,195,438 | Atlantic - Scotland            |
| H147 | Ssa09 | ctg7180001848663_1122_SAG  | 58,195,976 | Atlantic - Scotland            |
| H148 | Ssa09 | ctg7180001848663_10213_SCT | 58,205,067 | Atlantic - Scotland            |
| H149 | Ssa09 | ctg7180001847355_9337_SAG  | 58,223,389 | Atlantic - Scotland            |
| H150 | Ssa09 | ctg7180001312649_14961_SAC | 58,248,402 | Atlantic - Scotland            |
| H151 | Ssa09 | ctg7180001312649_453_SAG   | 58,262,909 | Atlantic - Scotland            |
| H152 | Ssa09 | ctg7180001887843_972_SGT   | 58,266,637 | Atlantic - Scotland            |
| H153 | Ssa09 | ctg7180001887843_2898_SGT  | 58,268,563 | Atlantic - Scotland            |
| H154 | Ssa09 | ctg7180001838944_8427_SAC  | 58,375,235 | Atlantic - Scotland            |
| H155 | Ssa09 | ctg7180001865919_2204_SAG  | 58,389,661 | Atlantic - Scotland            |
| H156 | Ssa09 | ctg7180001590636_1895_SCT  | 58,430,105 | Atlantic - Scotland            |
| H157 | Ssa09 | ctg7180001402062_4911_SAG  | 58,452,828 | Atlantic - Scotland            |
| H158 | Ssa09 | ctg7180001830587_2964_SAC  | 58,482,665 | Atlantic - Scotland            |
| H159 | Ssa09 | ctg7180001884548_9438_SAG  | 58,500,020 | Atlantic - Scotland            |
| H160 | Ssa09 | ctg7180001880756_664_SAG   | 58,847,162 | Atlantic - Scotland            |
| H161 | Ssa09 | ctg7180001855470_4117_SAG  | 58,869,843 | Atlantic - Scotland            |
| H162 | Ssa09 | ctg7180001855471_4478_SGT  | 58,876,238 | Atlantic - Scotland            |
| H163 | Ssa09 | ctg7180001598309_1102_SCT  | 58,893,732 | Atlantic - Scotland            |
| H164 | Ssa09 | ctg7180001865182_2554_SAC  | 58,924,618 | Atlantic - Scotland            |

|      |       |                            |            |                                |
|------|-------|----------------------------|------------|--------------------------------|
| H165 | Ssa09 | ctg7180001928730_8743_SCT  | 58,979,811 | Atlantic - Scotland            |
| H166 | Ssa09 | ctg7180001928730_11106_SGT | 58,982,174 | Atlantic - Scotland            |
| H167 | Ssa09 | ctg7180001928730_11750_SAC | 58,982,818 | Atlantic - Scotland            |
| H168 | Ssa09 | ctg7180001824427_4368_SGT  | 59,016,443 | Atlantic - Scotland            |
| H169 | Ssa09 | ctg7180001824427_1611_SCT  | 59,019,200 | Atlantic - Scotland            |
| H170 | Ssa09 | ctg7180001914278_2855_SAG  | 59,100,095 | Atlantic - Scotland            |
| H171 | Ssa09 | ctg7180001902377_817_SGT   | 59,124,136 | Atlantic - Scotland            |
| H172 | Ssa09 | ctg7180001902377_742_SAC   | 59,124,211 | Atlantic - Scotland            |
| H173 | Ssa09 | ctg7180001910145_3004_SCT  | 59,167,618 | Atlantic - Scotland            |
| H174 | Ssa09 | ctg7180001910145_3738_SGT  | 59,168,352 | Atlantic - Scotland            |
| H175 | Ssa09 | ctg7180001910145_14822_SCT | 59,179,436 | Atlantic - Scotland            |
| H176 | Ssa09 | ctg7180001910145_15746_SAG | 59,180,360 | Atlantic - Scotland            |
| H177 | Ssa09 | ctg7180001807792_11224_SAC | 59,214,280 | Atlantic - Scotland            |
| H178 | Ssa09 | ctg7180001807792_6698_SAG  | 59,218,806 | Atlantic - Scotland            |
| H179 | Ssa09 | ctg7180001807792_3473_SCT  | 59,222,031 | Atlantic - Scotland            |
| H180 | Ssa09 | ctg7180001478185_911_SGT   | 59,232,485 | Atlantic - Scotland            |
| H181 | Ssa09 | ctg7180001343147_3757_SAG  | 59,235,024 | Atlantic - Scotland            |
| H182 | Ssa09 | ctg7180001503789_930_SCT   | 59,239,714 | Atlantic - Scotland            |
| H183 | Ssa09 | ctg7180001503789_1591_SCT  | 59,240,375 | Atlantic - Scotland            |
| H184 | Ssa09 | ctg7180001910931_2027_SCT  | 59,260,699 | Atlantic - Scotland            |
| H185 | Ssa09 | ctg7180001910931_936_SGT   | 59,261,790 | Atlantic - Scotland            |
| H186 | Ssa09 | ctg7180001857343_125_SAG   | 59,267,390 | Atlantic - Scotland            |
| H187 | Ssa09 | ctg7180001857343_4447_SCT  | 59,271,712 | Atlantic - Scotland            |
| H188 | Ssa09 | ctg7180001857343_14669_SCT | 59,281,934 | Atlantic - Scotland            |
| H189 | Ssa09 | ctg7180001880651_15601_SAC | 59,293,193 | Atlantic& Cantabric - Scotland |
| H190 | Ssa09 | ctg7180001880651_13939_SCT | 59,294,855 | Atlantic - Scotland            |
| H191 | Ssa09 | ctg7180001880651_2788_SGT  | 59,306,006 | Atlantic& Cantabric - Scotland |
| H192 | Ssa09 | ctg7180001880650_17087_SCT | 59,310,176 | Atlantic - Scotland            |
| H193 | Ssa09 | ctg7180001880650_16601_SCT | 59,310,663 | Atlantic - Scotland            |
| H194 | Ssa09 | ctg7180001880650_6322_SAG  | 59,320,942 | Atlantic - Scotland            |
| H195 | Ssa09 | ctg7180001880650_6282_SAG  | 59,320,982 | Atlantic - Scotland            |
| H196 | Ssa09 | ctg7180001880650_5409_SGT  | 59,321,867 | Atlantic - Scotland            |
| H197 | Ssa09 | ctg7180001798132_4101_SAG  | 59,353,131 | Atlantic - Scotland            |
| H198 | Ssa09 | ctg7180001590691_546_SAC   | 59,354,976 | Atlantic - Scotland            |
| H199 | Ssa09 | ctg7180001590691_346_SAC   | 59,355,176 | Atlantic - Scotland            |
| H200 | Ssa09 | ctg7180001430493_2499_SCT  | 59,355,855 | Atlantic - Scotland            |
| H201 | Ssa09 | ctg7180001329698_2004_SAC  | 59,398,479 | Atlantic - Scotland            |
| H202 | Ssa09 | ctg7180001936708_9146_SCT  | 59,426,403 | Atlantic - Scotland            |
| H203 | Ssa09 | ctg7180001936708_18072_SAG | 59,435,329 | Atlantic - Scotland            |
| H204 | Ssa09 | ctg7180001936708_18687_SAG | 59,435,944 | Atlantic - Scotland            |
| H205 | Ssa09 | ctg7180001936708_23825_SGT | 59,441,082 | Atlantic - Scotland            |
| H206 | Ssa09 | ctg7180001794077_1426_SCT  | 59,445,417 | Atlantic - Scotland            |
| H207 | Ssa09 | ctg7180001794077_7541_SAG  | 59,451,532 | Atlantic - Scotland            |
| H208 | Ssa09 | ctg7180001900960_3117_SAC  | 59,455,456 | Atlantic - Scotland            |
| H209 | Ssa09 | ctg7180001590814_342_SAC   | 59,628,576 | Atlantic - Scotland            |
| H210 | Ssa09 | ctg7180001923719_5720_SGT  | 59,635,030 | Atlantic - Scotland            |
| H211 | Ssa09 | ctg7180001923719_8242_SGT  | 59,637,587 | Atlantic - Scotland            |
| H212 | Ssa09 | ctg7180001923719_8366_SAG  | 59,637,677 | Atlantic - Scotland            |
| H213 | Ssa09 | ctg7180001821349_5291_SAG  | 59,664,868 | Atlantic - Scotland            |

|      |       |                            |             |                                |
|------|-------|----------------------------|-------------|--------------------------------|
| H214 | Ssa09 | ctg7180001862708_2278_SAG  | 59,851,684  | Atlantic - Scotland            |
| H215 | Ssa09 | ctg7180001818102_11644_SAC | 59,877,367  | Atlantic - Scotland            |
| H216 | Ssa09 | ctg7180001818102_12694_SGT | 59,878,417  | Atlantic - Scotland            |
| H217 | Ssa09 | ctg7180001818102_14823_SCT | 59,880,546  | Atlantic - Scotland            |
| H218 | Ssa09 | ctg7180001848824_3128_SAG  | 59,908,141  | Atlantic - Scotland            |
| H219 | Ssa09 | ctg7180001848824_6025_SCT  | 59,911,038  | Atlantic - Scotland            |
| H220 | Ssa09 | ctg7180001848825_513_SAG   | 59,911,915  | Atlantic - Scotland            |
| H221 | Ssa09 | ctg7180001848825_4505_SCT  | 59,915,907  | Atlantic - Scotland            |
| H222 | Ssa09 | ctg7180001874248_14870_SCT | 60,004,787  | Atlantic - Scotland            |
| H223 | Ssa09 | ctg7180001841311_6068_SAC  | 60,030,507  | Atlantic - Scotland            |
| H224 | Ssa09 | ctg7180001744603_4752_SAC  | 112,700,513 | Cantabric - Scotland           |
| H225 | Ssa09 | ctg7180001898651_2354_SAG  | 117,342,909 | Atlantic - Scotland            |
| H226 | Ssa10 | ctg7180001910335_11899_SCT | 7,693,152   | Cantabric - Scotland           |
| H227 | Ssa10 | ctg7180001881285_2000_SGT  | 8,690,402   | Cantabric - Scotland           |
| H228 | Ssa10 | ctg7180001873085_5595_SGT  | 10,589,290  | Cantabric - Scotland           |
| H229 | Ssa10 | ctg7180001873085_5852_SCT  | 10,589,547  | Cantabric - Scotland           |
| H230 | Ssa10 | ctg7180001826825_3446_SGT  | 10,635,181  | Cantabric - Scotland           |
| H231 | Ssa10 | ctg7180001433539_2375_SAG  | 10,673,902  | Cantabric - Scotland           |
| H232 | Ssa10 | ctg7180001433539_7568_SAG  | 10,679,095  | Cantabric - Scotland           |
| H233 | Ssa10 | ctg7180001436140_1098_SAG  | 10,748,109  | Cantabric - Scotland           |
| H234 | Ssa10 | ctg7180001835524_8080_SGT  | 12,600,167  | Cantabric - Scotland           |
| H235 | Ssa10 | ctg7180001908181_8404_SAG  | 57,340,712  | Atlantic - Scotland            |
| H236 | Ssa10 | ctg7180001908181_8142_SCT  | 57,340,974  | Atlantic - Scotland            |
| H237 | Ssa10 | ctg7180001549788_3692_SCT  | 97,674,456  | Cantabric - Scotland           |
| H238 | Ssa10 | ctg7180001868951_5834_SCT  | 97,779,977  | Cantabric - Scotland           |
| H239 | Ssa10 | ctg7180001739572_1279_SCT  | 97,788,507  | Cantabric - Scotland           |
| H240 | Ssa10 | ctg7180001615130_768_SAG   | 97,802,281  | Cantabric - Scotland           |
| H241 | Ssa11 | ctg7180001505492_3927_SAG  | 874,306     | Cantabric - Scotland           |
| H242 | Ssa11 | ctg7180001793021_7140_SAG  | 910,538     | Cantabric - Scotland           |
| H243 | Ssa11 | ctg7180001907554_6589_SCT  | 995,223     | Cantabric - Scotland           |
| H244 | Ssa11 | ctg7180001907554_4514_SGT  | 997,298     | Cantabric - Scotland           |
| H245 | Ssa11 | ctg7180001907554_4482_SGT  | 997,330     | Cantabric - Scotland           |
| H246 | Ssa11 | ctg7180001907554_1153_SGT  | 1,000,659   | Cantabric - Scotland           |
| H247 | Ssa11 | ctg7180001904938_3860_SAC  | 1,005,642   | Atlantic& Cantabric - Scotland |
| H248 | Ssa11 | ctg7180001815957_4948_SGT  | 1,017,098   | Cantabric - Scotland           |
| H249 | Ssa11 | ctg7180001532142_1365_SAC  | 1,041,139   | Atlantic& Cantabric - Scotland |
| H250 | Ssa11 | ctg7180001532142_1560_SCT  | 1,041,334   | Atlantic& Cantabric - Scotland |
| H251 | Ssa11 | ctg7180001383734_1324_SCT  | 1,043,950   | Atlantic& Cantabric - Scotland |
| H252 | Ssa11 | ctg7180001882931_4294_SAC  | 1,049,881   | Atlantic& Cantabric - Scotland |
| H253 | Ssa11 | ctg7180001882931_8058_SAC  | 1,053,645   | Atlantic& Cantabric - Scotland |
| H254 | Ssa11 | ctg7180001882932_5229_SAG  | 1,060,087   | Atlantic - Scotland            |
| H255 | Ssa11 | ctg7180001882932_5398_SAG  | 1,060,256   | Atlantic - Scotland            |
| H256 | Ssa11 | ctg7180001824050_3906_SCT  | 1,090,743   | Atlantic& Cantabric - Scotland |
| H257 | Ssa11 | ctg7180001824050_3693_SGT  | 1,090,956   | Atlantic - Scotland            |
| H258 | Ssa11 | ctg7180001210942_818       | 1,095,585   | Atlantic - Scotland            |
| H259 | Ssa11 | ctg7180001210942_1639_SGT  | 1,096,371   | Atlantic - Scotland            |
| H260 | Ssa11 | ctg7180001921147_3977_SCT  | 1,117,469   | Atlantic - Scotland            |
| H261 | Ssa11 | ctg7180001921146_8382_SGT  | 1,127,695   | Atlantic - Scotland            |
| H262 | Ssa11 | ctg7180001613816_649_SCT   | 1,143,485   | Atlantic - Scotland            |

|      |       |                            |           |                                |
|------|-------|----------------------------|-----------|--------------------------------|
| H263 | Ssa11 | ctg7180001881465_7357_SAC  | 1,146,090 | Atlantic - Scotland            |
| H264 | Ssa11 | ctg7180001881465_6786_SAC  | 1,146,661 | Atlantic - Scotland            |
| H265 | Ssa11 | ctg7180001270964_8296_SAC  | 1,157,071 | Atlantic& Cantabric - Scotland |
| H266 | Ssa11 | ctg7180001270964_477_SAG   | 1,164,890 | Atlantic& Cantabric - Scotland |
| H267 | Ssa11 | ctg7180001270964_386_SCT   | 1,164,981 | Atlantic - Scotland            |
| H268 | Ssa11 | ctg7180001270964_362_SCT   | 1,165,005 | Atlantic - Scotland            |
| H269 | Ssa11 | ctg7180001915670_1543_SAC  | 1,167,122 | Atlantic - Scotland            |
| H270 | Ssa11 | ctg7180001893240_4064_SAG  | 1,210,370 | Atlantic& Cantabric - Scotland |
| H271 | Ssa11 | ctg7180001893240_7158_SGT  | 1,213,499 | Atlantic - Scotland            |
| H272 | Ssa11 | ctg7180001893240_7351_SAG  | 1,213,657 | Atlantic - Scotland            |
| H273 | Ssa11 | ctg7180001858710_12327_SAG | 1,234,760 | Atlantic - Scotland            |
| H274 | Ssa11 | ctg7180001858710_21824_SGT | 1,244,257 | Atlantic - Scotland            |
| H275 | Ssa11 | ctg7180001309811_341_SAC   | 1,245,184 | Atlantic& Cantabric - Scotland |
| H276 | Ssa11 | ctg7180001309811_750_SGT   | 1,245,593 | Atlantic - Scotland            |
| H277 | Ssa11 | ctg7180001914231_19513_SGT | 1,257,829 | Atlantic - Scotland            |
| H278 | Ssa11 | ctg7180001914231_13917_SAG | 1,263,425 | Atlantic - Scotland            |
| H279 | Ssa11 | ctg7180001914231_13301_SAG | 1,264,041 | Atlantic - Scotland            |
| H280 | Ssa11 | ctg7180001914231_19694_SCT | 1,273,688 | Atlantic - Scotland            |
| H281 | Ssa11 | ctg7180001853978_15040_SAG | 1,297,150 | Atlantic& Cantabric - Scotland |
| H282 | Ssa11 | ctg7180001865052_3369_SCT  | 1,361,087 | Atlantic - Scotland            |
| H283 | Ssa11 | ctg7180001923148_10333_SGT | 1,385,706 | Atlantic - Scotland            |
| H284 | Ssa11 | ctg7180001923148_10503_SCT | 1,385,876 | Atlantic - Scotland            |
| H285 | Ssa11 | ctg7180001923148_10929_SAG | 1,386,302 | Atlantic - Scotland            |
| H286 | Ssa11 | ctg7180001923148_11138_SCT | 1,386,511 | Atlantic - Scotland            |
| H287 | Ssa11 | ctg7180001923148_14460_SAG | 1,389,833 | Atlantic - Scotland            |
| H288 | Ssa11 | ctg7180001923148_21116_SCT | 1,396,489 | Atlantic - Scotland            |
| H289 | Ssa11 | ctg7180001923148_21898_SAG | 1,397,271 | Atlantic - Scotland            |
| H290 | Ssa11 | ctg7180001923148_22117_SAG | 1,397,490 | Atlantic - Scotland            |
| H291 | Ssa11 | ctg7180001923148_22465_SGT | 1,397,838 | Atlantic - Scotland            |
| H292 | Ssa11 | ctg7180001923148_23339_SCT | 1,398,718 | Atlantic - Scotland            |
| H293 | Ssa11 | ctg7180001912483_1150_SAG  | 1,405,904 | Atlantic - Scotland            |
| H294 | Ssa11 | ctg7180001912483_12052_SCT | 1,416,806 | Atlantic - Scotland            |
| H295 | Ssa11 | ctg7180001899290_23531_SCT | 1,464,450 | Atlantic - Scotland            |
| H296 | Ssa11 | ctg7180001899290_18435_SGT | 1,469,546 | Atlantic - Scotland            |
| H297 | Ssa11 | ctg7180001899290_15307_SAG | 1,473,123 | Atlantic& Cantabric - Scotland |
| H298 | Ssa11 | ctg7180001899290_14531_SAC | 1,473,450 | Atlantic& Cantabric - Scotland |
| H299 | Ssa11 | ctg7180001899290_10283_SAC | 1,477,698 | Atlantic& Cantabric - Scotland |
| H300 | Ssa11 | ctg7180001899289_1861_SCT  | 1,493,800 | Atlantic& Cantabric - Scotland |
| H301 | Ssa11 | ctg7180001831873_5394_SAC  | 1,528,954 | Atlantic& Cantabric - Scotland |
| H302 | Ssa11 | ctg7180001883718_7638_SCT  | 1,572,829 | Atlantic - Scotland            |
| H303 | Ssa11 | ctg7180001901617_8656_SCT  | 1,589,543 | Atlantic - Scotland            |
| H304 | Ssa11 | ctg7180001886989_1294_SGT  | 1,747,096 | Atlantic - Scotland            |
| H305 | Ssa11 | ctg7180001831322_6749_SAC  | 1,799,504 | Atlantic - Scotland            |
| H306 | Ssa11 | ctg7180001848210_4086_SCT  | 1,802,176 | Atlantic - Scotland            |
| H307 | Ssa11 | ctg7180001848210_3857_SCT  | 1,802,405 | Atlantic - Scotland            |
| H308 | Ssa11 | ctg7180001848210_634_SAC   | 1,805,628 | Atlantic - Scotland            |
| H309 | Ssa11 | ctg7180001848210_615_SCT   | 1,805,647 | Atlantic - Scotland            |
| H310 | Ssa11 | ctg7180001859185_2746_SAC  | 1,822,335 | Atlantic& Cantabric - Scotland |
| H311 | Ssa11 | ctg7180001859185_3461_SAG  | 1,823,050 | Atlantic - Scotland            |

|      |       |                            |            |                      |
|------|-------|----------------------------|------------|----------------------|
| H312 | Ssa11 | ctg7180001859185_3875_SAC  | 1,823,464  | Atlantic - Scotland  |
| H313 | Ssa11 | ctg7180001734006_1590_SCT  | 1,837,721  | Atlantic - Scotland  |
| H314 | Ssa11 | ctg7180001843450_18275_SAG | 1,853,254  | Atlantic - Scotland  |
| H315 | Ssa11 | ctg7180001843450_14099_SAG | 1,857,430  | Atlantic - Scotland  |
| H316 | Ssa11 | ctg7180001843450_4015_SAG  | 1,867,515  | Atlantic - Scotland  |
| H317 | Ssa11 | ctg7180001843450_3924_SCT  | 1,867,606  | Atlantic - Scotland  |
| H318 | Ssa11 | ctg7180001826880_3896_SAG  | 1,906,544  | Atlantic - Scotland  |
| H319 | Ssa11 | ctg7180001267856_502_SCT   | 1,985,119  | Atlantic - Scotland  |
| H320 | Ssa11 | ctg7180001344387_609_SAC   | 1,986,163  | Atlantic - Scotland  |
| H321 | Ssa11 | ctg7180001344387_1122_SCT  | 1,986,676  | Atlantic - Scotland  |
| H322 | Ssa11 | ctg7180001719742_1128_SCT  | 1,989,872  | Atlantic - Scotland  |
| H323 | Ssa11 | ctg7180001878029_2992_SAC  | 2,008,424  | Atlantic - Scotland  |
| H324 | Ssa11 | ctg7180001869773_5106_SGT  | 2,012,544  | Atlantic - Scotland  |
| H325 | Ssa11 | ctg7180001275940_3090_SCT  | 2,095,841  | Atlantic - Scotland  |
| H326 | Ssa11 | ctg7180001804348_10282_SAC | 4,029,683  | Atlantic - Scotland  |
| H327 | Ssa11 | ctg7180001848151_1867_SAG  | 5,016,230  | Atlantic - Scotland  |
| H328 | Ssa11 | ctg7180001835390_13690_SAC | 5,609,706  | Atlantic - Scotland  |
| H329 | Ssa11 | ctg7180001910695_8496_SAG  | 5,649,247  | Atlantic - Scotland  |
| H330 | Ssa11 | ctg7180001910695_6610_SGT  | 5,651,133  | Atlantic - Scotland  |
| H331 | Ssa11 | ctg7180001904475_6737_SCT  | 77,031,378 | Atlantic - Scotland  |
| H332 | Ssa11 | ctg7180001852881_7065_SGT  | 77,057,570 | Atlantic - Scotland  |
| H333 | Ssa11 | ctg7180001541637_66_SCT    | 77,074,011 | Atlantic - Scotland  |
| H334 | Ssa11 | ctg7180001753246_79_SCT    | 77,089,857 | Atlantic - Scotland  |
| H335 | Ssa11 | ctg7180001878972_374_SAG   | 77,112,559 | Atlantic - Scotland  |
| H336 | Ssa12 | ctg7180001299154_3833_SAG  | 36,223,137 | Atlantic - Scotland  |
| H337 | Ssa12 | ctg7180001802246_5796_SGT  | 36,528,557 | Atlantic - Scotland  |
| H338 | Ssa12 | ctg7180001803899_3428_SCG  | 36,573,142 | Atlantic - Scotland  |
| H339 | Ssa13 | ctg7180001899453_5271_SCT  | 65,545,947 | Atlantic - Cantabric |
| H340 | Ssa13 | ctg7180001805890_9129_SAG  | 65,709,860 | Atlantic - Cantabric |
| H341 | Ssa14 | ctg7180001439715_9021_SAC  | 61,526,521 | Atlantic - Scotland  |
| H342 | Ssa14 | ctg7180001439715_9362_SAG  | 61,526,862 | Atlantic - Scotland  |
| H343 | Ssa14 | ctg7180001686171_3826_SAC  | 61,533,936 | Atlantic - Scotland  |
| H344 | Ssa14 | ctg7180001766677_331_SCT   | 61,537,820 | Atlantic - Scotland  |
| H345 | Ssa14 | ctg7180001766677_665_SCT   | 61,538,117 | Atlantic - Scotland  |
| H346 | Ssa14 | ctg7180001898178_1544_SGT  | 61,623,028 | Atlantic - Scotland  |
| H347 | Ssa14 | ctg7180001899974_55334_SAG | 61,629,355 | Atlantic - Scotland  |
| H348 | Ssa14 | ctg7180001899974_54482_SCT | 61,630,207 | Atlantic - Scotland  |
| H349 | Ssa14 | ctg7180001899974_54438_SAG | 61,630,251 | Atlantic - Scotland  |
| H350 | Ssa14 | ctg7180001899974_53790_SAG | 61,630,899 | Atlantic - Scotland  |
| H351 | Ssa14 | ctg7180001899974_47280_SAG | 61,637,411 | Atlantic - Scotland  |
| H352 | Ssa14 | ctg7180001899974_47053_SAG | 61,637,638 | Atlantic - Scotland  |
| H353 | Ssa14 | ctg7180001899974_46545_SAG | 61,638,146 | Atlantic - Scotland  |
| H354 | Ssa14 | ctg7180001899974_46497_SAG | 61,638,194 | Atlantic - Scotland  |
| H355 | Ssa14 | ctg7180001899974_46494_SAC | 61,638,197 | Atlantic - Scotland  |
| H356 | Ssa14 | ctg7180001899974_45976_SAC | 61,638,715 | Atlantic - Scotland  |
| H357 | Ssa14 | ctg7180001899974_45406_SGT | 61,639,285 | Atlantic - Scotland  |
| H358 | Ssa14 | ctg7180001899974_45184_SAG | 61,639,507 | Atlantic - Scotland  |
| H359 | Ssa14 | ctg7180001899974_45181_SCT | 61,639,510 | Atlantic - Scotland  |
| H360 | Ssa14 | ctg7180001899974_45064_SCT | 61,639,627 | Atlantic - Scotland  |



|      |       |                            |            |                                |
|------|-------|----------------------------|------------|--------------------------------|
| H361 | Ssa14 | ctg7180001899974_44980_SCT | 61,639,711 | Atlantic - Scotland            |
| H362 | Ssa14 | ctg7180001899974_43833_SCT | 61,640,858 | Atlantic - Scotland            |
| H363 | Ssa14 | ctg7180001899974_43418_SGT | 61,641,273 | Atlantic - Scotland            |
| H364 | Ssa14 | ctg7180001899974_39915_SAG | 61,644,776 | Atlantic - Scotland            |
| H365 | Ssa14 | ctg7180001899974_39585_SCT | 61,645,106 | Atlantic - Scotland            |
| H366 | Ssa14 | ctg7180001899974_35399_SCT | 61,649,292 | Atlantic - Scotland            |
| H367 | Ssa14 | ctg7180001912177_4596_SAC  | 68,296,505 | Atlantic - Scotland            |
| H368 | Ssa14 | ctg7180001912177_4249_SCT  | 68,296,852 | Atlantic - Scotland            |
| H369 | Ssa14 | ctg7180001882025_6604_SAG  | 76,709,770 | Cantabric - Scotland           |
| H370 | Ssa15 | ctg7180001821128_12002_SAC | 27,751,213 | Cantabric - Scotland           |
| H371 | Ssa15 | ctg7180001821128_11976_SAC | 27,751,239 | Cantabric - Scotland           |
| H372 | Ssa15 | ctg7180001893122_4750_SCT  | 66,167,141 | Atlantic - Scotland            |
| H373 | Ssa15 | ctg7180001347103_6538_SAG  | 66,174,746 | Atlantic - Scotland            |
| H374 | Ssa15 | ctg7180001225716_4839_SAG  | 71,041,793 | Cantabric - Scotland           |
| H375 | Ssa15 | ctg7180001789781_1476_SGT  | 78,424,592 | Atlantic - Scotland            |
| H376 | Ssa15 | ctg7180001789781_2046_SCT  | 78,425,162 | Atlantic - Scotland            |
| H377 | Ssa15 | ctg7180001463780_1438_SCT  | 95,822,541 | Cantabric - Scotland           |
| H378 | Ssa16 | ctg7180001690596_1831_SCT  | 29,048,609 | Atlantic - Scotland            |
| H379 | Ssa16 | ctg7180001187717_2499_SAG  | 29,104,938 | Atlantic& Cantabric - Scotland |
| H380 | Ssa16 | ctg7180001187717_1844_SAC  | 29,105,593 | Atlantic& Cantabric - Scotland |
| H381 | Ssa16 | ctg7180001684182_2268_SAC  | 29,247,269 | Atlantic - Scotland            |
| H382 | Ssa16 | ctg7180001629042_26172_SCT | 29,259,954 | Atlantic - Scotland            |
| H383 | Ssa16 | ctg7180001232716_4779_SGT  | 29,291,371 | Atlantic - Scotland            |
| H384 | Ssa16 | ctg7180001563794_1084      | 29,314,299 | Atlantic - Scotland            |
| H385 | Ssa16 | ctg7180001824301_1009_SGT  | 29,382,992 | Atlantic - Scotland            |
| H386 | Ssa16 | ctg7180001911673_8376_SCT  | 29,891,003 | Atlantic - Scotland            |
| H387 | Ssa16 | ctg7180001830338_1987_SAG  | 29,898,378 | Atlantic - Scotland            |
| H388 | Ssa16 | ctg7180001830338_2646_SAC  | 29,899,037 | Atlantic - Scotland            |
| H389 | Ssa16 | ctg7180001818928_1075_SGT  | 29,929,051 | Atlantic - Scotland            |
| H390 | Ssa16 | ctg7180001877117_5794_SAG  | 29,945,805 | Atlantic - Scotland            |
| H391 | Ssa16 | ctg7180001827929_736_SAC   | 29,949,157 | Atlantic - Scotland            |
| H392 | Ssa16 | GCR_cBin16227_Ctg1_85      | 29,966,143 | Atlantic - Scotland            |
| H393 | Ssa16 | ctg7180001795854_411_SCT   | 29,966,454 | Atlantic - Scotland            |
| H394 | Ssa16 | ctg7180001795854_730_SAG   | 29,966,773 | Atlantic - Scotland            |
| H395 | Ssa16 | ctg7180001795854_1995_SGT  | 29,968,038 | Atlantic - Scotland            |
| H396 | Ssa16 | ctg7180001795854_2466_SAG  | 29,968,509 | Atlantic - Scotland            |
| H397 | Ssa16 | ctg7180001795854_5651_SCT  | 29,971,693 | Atlantic - Scotland            |
| H398 | Ssa16 | ctg7180001279355_3440_SGT  | 29,983,686 | Atlantic - Scotland            |
| H399 | Ssa16 | ctg7180001279355_1655_SAG  | 29,985,471 | Atlantic - Scotland            |
| H400 | Ssa16 | ctg7180001279355_59_SCT    | 29,987,067 | Atlantic - Scotland            |
| H401 | Ssa16 | ctg7180001589388_1492_SGT  | 30,018,748 | Atlantic - Scotland            |
| H402 | Ssa16 | ctg7180001852796_12159_SAC | 30,069,262 | Atlantic - Scotland            |
| H403 | Ssa16 | ctg7180001562309_1991_SGT  | 30,197,783 | Atlantic - Scotland            |
| H404 | Ssa16 | ctg7180001574197_675_SAG   | 30,204,693 | Atlantic - Scotland            |
| H405 | Ssa16 | ctg7180001581361_1577_SCT  | 30,209,377 | Atlantic - Scotland            |
| H406 | Ssa17 | ctg7180001871360_2456_SAC  | 4,499,082  | Atlantic - Scotland            |
| H407 | Ssa17 | ctg7180001871360_5835_SAG  | 4,502,461  | Atlantic - Scotland            |
| H408 | Ssa17 | ctg7180001894687_4835_SGT  | 5,507,371  | Atlantic - Cantabric           |
| H409 | Ssa17 | ctg7180001895274_64_SCT    | 5,557,108  | Atlantic - Cantabric           |

|      |       |                            |            |                                |
|------|-------|----------------------------|------------|--------------------------------|
| H410 | Ssa17 | ctg7180001926196_6568_SAG  | 5,575,350  | Atlantic - Cantabric           |
| H411 | Ssa17 | ctg7180001825609_496_SGT   | 5,725,753  | Atlantic - Cantabric           |
| H412 | Ssa17 | ctg7180001732592_2350_SCT  | 5,726,785  | Atlantic - Cantabric           |
| H413 | Ssa17 | ctg7180001902025_3556_SAG  | 6,850,553  | Atlantic - Scotland            |
| H414 | Ssa17 | ctg7180001902025_1418_SAC  | 6,852,691  | Atlantic - Scotland            |
| H415 | Ssa17 | ctg7180001922955_5846_SAG  | 6,860,933  | Atlantic - Scotland            |
| H416 | Ssa17 | ctg7180001922955_7029_SAC  | 6,862,116  | Atlantic - Scotland            |
| H417 | Ssa17 | ctg7180001922955_9218_SAG  | 6,864,305  | Atlantic - Scotland            |
| H418 | Ssa17 | ctg7180001901180_4957_SAG  | 12,948,551 | Atlantic - Scotland            |
| H419 | Ssa17 | ctg7180001901180_596_SCT   | 12,952,912 | Atlantic - Scotland            |
| H420 | Ssa17 | ctg7180001735894_1240_SGT  | 12,959,113 | Atlantic - Scotland            |
| H421 | Ssa17 | ctg7180001480207_2275_SAG  | 12,960,485 | Atlantic - Scotland            |
| H422 | Ssa17 | ctg7180001480207_1858_SCT  | 12,960,902 | Atlantic - Scotland            |
| H423 | Ssa17 | ctg7180001480207_1440_SCT  | 12,961,320 | Atlantic - Scotland            |
| H424 | Ssa17 | ctg7180001480207_671_SCT   | 12,962,089 | Atlantic - Scotland            |
| H425 | Ssa17 | ctg7180001480207_234_SGT   | 12,962,526 | Atlantic - Scotland            |
| H426 | Ssa17 | ctg7180001780683_4176_SAG  | 12,969,811 | Atlantic - Scotland            |
| H427 | Ssa17 | ctg7180001822119_6429_SCT  | 13,018,433 | Atlantic - Scotland            |
| H428 | Ssa18 | ctg7180001432617_3815_SAG  | 4,445,418  | Atlantic - Scotland            |
| H429 | Ssa18 | ctg7180001703813_1551_SAC  | 59,027,193 | Atlantic - Scotland            |
| H430 | Ssa18 | ctg7180001703813_1713_SCT  | 59,027,355 | Atlantic - Scotland            |
| H431 | Ssa18 | ctg7180001703813_1948_SGT  | 59,027,590 | Atlantic& Cantabric - Scotland |
| H432 | Ssa19 | ctg7180001799854_3907_SCT  | 4,246,376  | Atlantic - Scotland            |
| H433 | Ssa19 | ctg7180001908453_13063_SCT | 8,176,370  | Cantabric - Scotland           |
| H434 | Ssa19 | ctg7180001196981_2351_SCT  | 8,200,317  | Cantabric - Scotland           |
| H435 | Ssa19 | ctg7180001842604_3938_SGT  | 8,210,801  | Cantabric - Scotland           |
| H436 | Ssa19 | ctg7180001805830_328_SAG   | 10,956,263 | Atlantic - Scotland            |
| H437 | Ssa20 | ctg7180001822949_1132_SCT  | 9,063,295  | Atlantic - Scotland            |
| H438 | Ssa20 | ctg7180001822949_896_SAG   | 9,063,531  | Atlantic - Scotland            |
| H439 | Ssa20 | ctg7180001458779_131_SGT   | 12,877,492 | Atlantic - Cantabric           |
| H440 | Ssa20 | ctg7180001859363_19054_SCT | 13,742,992 | Atlantic - Scotland            |
| H441 | Ssa20 | ctg7180001875589_5087_SGT  | 51,348,431 | Cantabric - Scotland           |
| H442 | Ssa20 | ctg7180001289793_1211_SAC  | 51,400,831 | Cantabric - Scotland           |
| H443 | Ssa20 | ctg7180001932294_6712_SCT  | 51,409,488 | Cantabric - Scotland           |
| H444 | Ssa21 | ctg7180001910313_8618_SAG  | 15,460,165 | Atlantic - Scotland            |
| H445 | Ssa21 | ctg7180001881048_749_SAG   | 15,781,775 | Atlantic - Scotland            |
| H446 | Ssa21 | ctg7180001870953_1829_SCT  | 16,070,580 | Atlantic - Scotland            |
| H447 | Ssa21 | ctg7180001870953_2034_SAG  | 16,070,785 | Atlantic - Scotland            |
| H448 | Ssa21 | ctg7180001900148_13156_SGT | 16,080,694 | Atlantic - Scotland            |
| H449 | Ssa21 | ctg7180001900148_9051_SAG  | 16,084,799 | Atlantic - Scotland            |
| H450 | Ssa21 | ctg7180001794673_4695_SAC  | 41,360,019 | Atlantic - Scotland            |
| H451 | Ssa21 | ctg7180001843512_6137_SAG  | 49,908,772 | Atlantic - Scotland            |
| H452 | Ssa21 | ctg7180001895237_1805_SAG  | 50,142,608 | Cantabric - Scotland           |
| H453 | Ssa22 | ctg7180001872597_6133_SAG  | 21,063,319 | Atlantic - Scotland            |
| H454 | Ssa22 | ctg7180001872597_2430_SCT  | 21,067,022 | Atlantic - Scotland            |
| H455 | Ssa22 | ctg7180001886294_2306_SAG  | 21,095,730 | Atlantic - Scotland            |
| H456 | Ssa22 | ctg7180001886294_3123_SAC  | 21,096,547 | Atlantic - Scotland            |
| H457 | Ssa22 | ctg7180001886294_4976_SAG  | 21,098,400 | Atlantic - Scotland            |
| H458 | Ssa22 | ctg7180001911652_4500_SAG  | 21,105,147 | Atlantic - Scotland            |

|      |       |                            |            |                                |
|------|-------|----------------------------|------------|--------------------------------|
| H459 | Ssa22 | ctg7180001911652_6459_SAG  | 21,107,106 | Atlantic - Scotland            |
| H460 | Ssa22 | ctg7180001922606_10111_SGT | 21,136,117 | Atlantic - Scotland            |
| H461 | Ssa22 | ctg7180001922606_25030     | 21,146,040 | Atlantic - Scotland            |
| H462 | Ssa22 | ctg7180001510474_892_SGT   | 21,208,122 | Atlantic - Scotland            |
| H463 | Ssa22 | ctg7180001791406_3889_SAC  | 21,284,102 | Atlantic - Scotland            |
| H464 | Ssa22 | ctg7180001791406_4749_SAG  | 21,284,962 | Atlantic - Scotland            |
| H465 | Ssa22 | ctg7180001791406_6499_SCT  | 21,286,712 | Atlantic - Scotland            |
| H466 | Ssa22 | ctg7180001791406_8999_SAG  | 21,289,712 | Atlantic - Scotland            |
| H467 | Ssa22 | ctg7180001861102_1098_SAG  | 21,294,818 | Atlantic - Scotland            |
| H468 | Ssa22 | ctg7180001861104_1736_SAG  | 21,307,877 | Atlantic - Scotland            |
| H469 | Ssa22 | ctg7180001861104_5482_SGT  | 21,311,588 | Atlantic& Cantabric - Scotland |
| H470 | Ssa22 | ctg7180001861104_6760_SCT  | 21,312,866 | Atlantic - Scotland            |
| H471 | Ssa22 | ctg7180001790123_1093_SCT  | 21,391,174 | Atlantic - Scotland            |
| H472 | Ssa22 | ctg7180001817574_6975_SGT  | 28,796,204 | Cantabric - Scotland           |
| H473 | Ssa22 | ctg7180001569764_256_SAC   | 28,847,745 | Cantabric - Scotland           |
| H474 | Ssa24 | ctg7180001866170_4096_SCT  | 23,941,228 | Atlantic - Scotland            |
| H475 | Ssa24 | ctg7180001915028_7514_SAG  | 24,944,591 | Atlantic - Scotland            |
| H476 | Ssa24 | ctg7180001856738_104_SGT   | 25,097,646 | Atlantic - Scotland            |
| H477 | Ssa24 | ctg7180001821474_3967_SAG  | 25,118,090 | Atlantic - Scotland            |
| H478 | Ssa24 | ctg7180001516867_2850_SCT  | 25,173,557 | Cantabric - Scotland           |
| H479 | Ssa24 | ctg7180001908592_4387_SCT  | 25,178,986 | Atlantic& Cantabric - Scotland |
| H480 | Ssa24 | ctg7180001908592_10854_SCT | 25,185,453 | Cantabric - Scotland           |
| H481 | Ssa24 | ctg7180001908592_11488_SGT | 25,186,087 | Atlantic& Cantabric - Scotland |
| H482 | Ssa24 | ctg7180001908592_15027_SAC | 25,189,626 | Atlantic& Cantabric - Scotland |
| H483 | Ssa24 | ctg7180001908592_22106_SAG | 25,196,705 | Atlantic& Cantabric - Scotland |
| H484 | Ssa24 | ctg7180001908592_22338_SAG | 25,196,937 | Cantabric - Scotland           |
| H485 | Ssa24 | ctg7180001931927_12945_SAC | 25,224,283 | Atlantic& Cantabric - Scotland |
| H486 | Ssa24 | ctg7180001878964_1947_SCT  | 25,239,312 | Cantabric - Scotland           |
| H487 | Ssa24 | ctg7180001878964_2058_SGT  | 25,239,423 | Cantabric - Scotland           |
| H488 | Ssa24 | ctg7180001812117_1745_SGT  | 25,249,910 | Atlantic& Cantabric - Scotland |
| H489 | Ssa24 | ctg7180001812117_2070_SAC  | 25,250,235 | Atlantic& Cantabric - Scotland |
| H490 | Ssa24 | ctg7180001812117_2701_SCT  | 25,250,866 | Atlantic& Cantabric - Scotland |
| H491 | Ssa24 | ctg7180001425328_580_SCT   | 25,256,160 | Atlantic& Cantabric - Scotland |
| H492 | Ssa24 | ctg7180001807519_15025_SCT | 25,272,938 | Atlantic - Scotland            |
| H493 | Ssa24 | ctg7180001807519_8272_SAG  | 25,280,830 | Atlantic - Scotland            |
| H494 | Ssa24 | ctg7180001807519_451_SAG   | 25,287,512 | Atlantic - Scotland            |
| H495 | Ssa24 | ctg7180001741632_299_SGT   | 25,291,395 | Atlantic - Scotland            |
| H496 | Ssa24 | ctg7180001919198_16843_SGT | 25,317,008 | Atlantic - Scotland            |
| H497 | Ssa24 | ctg7180001919198_7460_SAC  | 25,326,389 | Atlantic - Scotland            |
| H498 | Ssa24 | ctg7180001919198_4458_SAG  | 25,329,391 | Atlantic - Scotland            |
| H499 | Ssa24 | ctg7180001919198_306_SAG   | 25,333,542 | Atlantic - Scotland            |
| H500 | Ssa24 | ctg7180001899698_7089_SCT  | 25,502,040 | Atlantic - Scotland            |
| H501 | Ssa24 | ctg7180001919737_18870_SGT | 25,514,293 | Atlantic - Scotland            |
| H502 | Ssa24 | ctg7180001919737_3620_SGT  | 25,529,543 | Atlantic - Scotland            |
| H503 | Ssa24 | ctg7180001817456_1115_SCT  | 25,537,226 | Atlantic& Cantabric - Scotland |
| H504 | Ssa24 | ctg7180001817456_2124_SCT  | 25,538,633 | Atlantic - Scotland            |
| H505 | Ssa24 | ctg7180001839382_173_SGT   | 25,539,413 | Atlantic - Scotland            |
| H506 | Ssa24 | ctg7180001839382_2024_SAG  | 25,541,299 | Atlantic - Scotland            |
| H507 | Ssa24 | ctg7180001810142_632_SCT   | 25,554,902 | Atlantic - Scotland            |

|      |       |                            |            |                                |
|------|-------|----------------------------|------------|--------------------------------|
| H508 | Ssa24 | ctg7180001810142_807_SGT   | 25,555,077 | Atlantic - Scotland            |
| H509 | Ssa24 | ctg7180001810142_5402_SAG  | 25,559,672 | Atlantic - Scotland            |
| H510 | Ssa24 | ctg7180001810142_10425_SGT | 25,564,695 | Atlantic - Scotland            |
| H511 | Ssa24 | ctg7180001850076_10066_SAG | 25,635,255 | Atlantic - Scotland            |
| H512 | Ssa24 | ctg7180001850076_250_SAC   | 25.645.595 | Atlantic - Scotland            |
| H513 | Ssa24 | ctg7180001778985_687_SAG   | 25.669.630 | Atlantic - Scotland            |
| H514 | Ssa24 | ctg7180001794579_12715_SAC | 25,674,456 | Atlantic - Scotland            |
| H515 | Ssa24 | ctg7180001627869_731_SCT   | 25,840,216 | Atlantic - Scotland            |
| H516 | Ssa24 | ctg7180001469599_940_SCT   | 25,864,496 | Atlantic - Scotland            |
| H517 | Ssa24 | ctg7180001469599_5312_SCT  | 25,868,868 | Atlantic - Scotland            |
| H518 | Ssa24 | ctg7180001876298_2225_SAG  | 25,871,806 | Atlantic - Scotland            |
| H519 | Ssa24 | ctg7180001935000_14361_SAC | 25,919,189 | Atlantic - Scotland            |
| H520 | Ssa24 | ctg7180001935000_14228_SCT | 25,919,322 | Atlantic - Scotland            |
| H521 | Ssa24 | ctg7180001180420_1426_SCT  | 25,936,607 | Atlantic - Scotland            |
| H522 | Ssa24 | ctg7180001180420_802_SCT   | 25,937,231 | Atlantic - Scotland            |
| H523 | Ssa24 | ctg7180001902878_13479_SAG | 25,943,149 | Atlantic - Scotland            |
| H524 | Ssa24 | ctg7180001902878_11547_SCT | 25,945,081 | Atlantic - Scotland            |
| H525 | Ssa24 | ctg7180001902878_9833_SCT  | 25,946,795 | Atlantic - Scotland            |
| H526 | Ssa24 | ctg7180001902878_3616_SAG  | 25,953,012 | Atlantic - Scotland            |
| H527 | Ssa24 | ctg7180001857040_2423_SAG  | 25,964,712 | Atlantic - Scotland            |
| H528 | Ssa24 | ctg7180001857040_15721_SAG | 25,978,010 | Atlantic - Scotland            |
| H529 | Ssa24 | ctg7180001857040_18228_SAG | 25,980,517 | Atlantic - Scotland            |
| H530 | Ssa24 | ctg7180001546415_11728_SAG | 25,999,329 | Atlantic - Scotland            |
| H531 | Ssa24 | ctg7180001546415_9418_SAG  | 26,001,639 | Atlantic& Cantabric - Scotland |
| H532 | Ssa24 | ctg7180001546415_2232_SAG  | 26,008,825 | Atlantic - Scotland            |
| H533 | Ssa24 | ctg7180001890582_1324_SAG  | 26,059,207 | Atlantic - Scotland            |
| H534 | Ssa24 | ctg7180001890582_11181_SAG | 26,070,018 | Atlantic - Scotland            |
| H535 | Ssa24 | ctg7180001918049_3927_SAG  | 26,103,524 | Atlantic - Scotland            |
| H536 | Ssa24 | ctg7180001918049_3340_SCT  | 26,104,111 | Atlantic - Scotland            |
| H537 | Ssa24 | ctg7180001758461_1649_SAC  | 26,127,186 | Atlantic - Scotland            |
| H538 | Ssa24 | ctg7180001357756_2268_SCT  | 26,138,709 | Atlantic - Scotland            |
| H539 | Ssa24 | ctg7180001788059_469_SAC   | 26,173,065 | Atlantic - Scotland            |
| H540 | Ssa24 | ctg7180001301776_6698_SGT  | 26,188,282 | Atlantic - Scotland            |
| H541 | Ssa24 | ctg7180001301776_5842_SAG  | 26,189,138 | Atlantic - Scotland            |
| H542 | Ssa24 | ctg7180001787258_2803_SAG  | 33,916,510 | Atlantic - Scotland            |
| H543 | Ssa24 | ctg7180001787258_1514_SAC  | 33,917,799 | Atlantic - Scotland            |
| H544 | Ssa24 | ctg7180001787258_213_SGT   | 33,919,100 | Atlantic - Scotland            |
| H545 | Ssa24 | ctg7180001787258_179_SCT   | 33,919,134 | Atlantic - Scotland            |
| H546 | Ssa24 | ctg7180001873440_14271_SAG | 34,238,364 | Atlantic - Scotland            |
| H547 | Ssa24 | ctg7180001873440_11804_SAC | 34,240,831 | Cantabric - Scotland           |
| H548 | Ssa24 | ctg7180001873440_11406_SCT | 34,241,229 | Atlantic - Scotland            |
| H549 | Ssa24 | ctg7180001873440_4390_SAC  | 34,248,245 | Atlantic - Scotland            |
| H550 | Ssa24 | ctg7180001442840_2717_SCT  | 34,254,971 | Atlantic& Cantabric - Scotland |
| H551 | Ssa24 | ctg7180001667216_3777_SGT  | 34,285,495 | Cantabric - Scotland           |
| H552 | Ssa24 | ctg7180001667216_3795_SGT  | 34,285,513 | Cantabric - Scotland           |
| H553 | Ssa24 | ctg7180001917002_11499_SCT | 34,307,595 | Atlantic - Scotland            |
| H554 | Ssa24 | ctg7180001438770_1771_SAG  | 34,346,206 | Cantabric - Scotland           |
| H555 | Ssa24 | ctg7180001877673_7001_SGT  | 34,363,076 | Atlantic - Scotland            |
| H556 | Ssa24 | ctg7180001831265_4965_SAG  | 34,392,645 | Atlantic - Scotland            |

|      |       |                            |            |                                |
|------|-------|----------------------------|------------|--------------------------------|
| H557 | Ssa24 | ctg7180001444597_14097_SGT | 34,396,181 | Atlantic& Cantabric - Scotland |
| H558 | Ssa24 | ctg7180001823327_1122_SAG  | 34,411,670 | Atlantic& Cantabric - Scotland |
| H559 | Ssa24 | ctg7180001823327_3720_SCT  | 34,414,267 | Atlantic& Cantabric - Scotland |
| H560 | Ssa24 | ctg7180001823327_8293_SAG  | 34,418,840 | Atlantic& Cantabric - Scotland |
| H561 | Ssa24 | ctg7180001924378_2105_SAC  | 34,426,792 | Atlantic& Cantabric - Scotland |
| H562 | Ssa24 | ctg7180001924378_2273_SGT  | 34,426,960 | Atlantic& Cantabric - Scotland |
| H563 | Ssa24 | ctg7180001924378_6311_SCT  | 34,430,998 | Atlantic& Cantabric - Scotland |
| H564 | Ssa24 | ctg7180001924378_8657_SAC  | 34,433,344 | Atlantic& Cantabric - Scotland |
| H565 | Ssa24 | ctg7180001924378_10026_SAC | 34,434,713 | Atlantic& Cantabric - Scotland |
| H566 | Ssa24 | ctg7180001671303_5671_SCT  | 34,500,517 | Atlantic& Cantabric - Scotland |
| H567 | Ssa24 | ctg7180001873903_10850_SAG | 34,526,840 | Atlantic - Scotland            |
| H568 | Ssa24 | ctg7180001873903_7471_SAG  | 34,530,219 | Atlantic - Scotland            |
| H569 | Ssa24 | ctg7180001832887_6847_SCT  | 34,579,691 | Atlantic& Cantabric - Scotland |
| H570 | Ssa24 | ctg7180001832887_4244_SGT  | 34,582,294 | Atlantic - Scotland            |
| H571 | Ssa24 | ctg7180001832887_3346_SGT  | 34,583,192 | Atlantic - Scotland            |
| H572 | Ssa24 | ctg7180001934797_11171_SAG | 34,594,910 | Atlantic - Scotland            |
| H573 | Ssa24 | ctg7180001934797_5659_SGT  | 34,600,422 | Atlantic - Scotland            |
| H574 | Ssa24 | ctg7180001934797_3831_SAG  | 34,602,250 | Atlantic - Scotland            |
| H575 | Ssa24 | ctg7180001934797_956_SCT   | 34,605,125 | Atlantic - Scotland            |
| H576 | Ssa24 | ctg7180001739432_1031_SCT  | 34,607,059 | Atlantic - Scotland            |
| H577 | Ssa24 | ctg7180001739432_2109_SCT  | 34,608,137 | Atlantic& Cantabric - Scotland |
| H578 | Ssa24 | ctg7180001739432_3082_SAG  | 34,609,110 | Atlantic& Cantabric - Scotland |
| H579 | Ssa24 | ctg7180001826026_27021_SCT | 34,622,839 | Atlantic - Scotland            |
| H580 | Ssa24 | ctg7180001826026_19583_SAG | 34,630,604 | Atlantic - Scotland            |
| H581 | Ssa24 | ctg7180001826026_19535_SAG | 34,630,652 | Atlantic - Scotland            |
| H582 | Ssa24 | ctg7180001826026_18626_SGT | 34,631,561 | Atlantic& Cantabric - Scotland |
| H583 | Ssa24 | ctg7180001826026_17233_SAG | 34,632,954 | Atlantic& Cantabric - Scotland |
| H584 | Ssa24 | ctg7180001826026_13446_SAG | 34,636,741 | Atlantic& Cantabric - Scotland |
| H585 | Ssa24 | ctg7180001826026_17709_SCT | 34,639,940 | Atlantic& Cantabric - Scotland |
| H586 | Ssa24 | ctg7180001919078_12605_SCT | 34,653,643 | Atlantic - Scotland            |
| H587 | Ssa24 | ctg7180001919078_10373_SGT | 34,655,875 | Cantabric - Scotland           |
| H588 | Ssa24 | ctg7180001919078_9062_SAC  | 34,657,186 | Atlantic - Scotland            |
| H589 | Ssa24 | ctg7180001919078_8281_SCT  | 34,657,967 | Atlantic& Cantabric - Scotland |
| H590 | Ssa24 | ctg7180001919078_6438_SCT  | 34,659,810 | Atlantic - Scotland            |
| H591 | Ssa24 | ctg7180001919078_4019_SCT  | 34,662,229 | Cantabric - Scotland           |
| H592 | Ssa24 | ctg7180001842969_6949_SCT  | 34,691,349 | Cantabric - Scotland           |
| H593 | Ssa25 | ctg7180001293867_1285_SCT  | 7,175,102  | Atlantic - Cantabric           |
| H594 | Ssa25 | ctg7180001293867_2418_SCT  | 7,176,323  | Atlantic - Cantabric           |
| H595 | Ssa25 | ctg7180001870040_8892_SAC  | 32,308,767 | Atlantic - Scotland            |
| H596 | Ssa25 | ctg7180001267213_2822_SAG  | 32,316,665 | Atlantic - Scotland            |
| H597 | Ssa25 | ctg7180001734517_847_SCT   | 32,362,494 | Atlantic - Scotland            |
| H598 | Ssa25 | ctg7180001928497_2262_SAC  | 32,983,986 | Cantabric - Scotland           |
| H599 | Ssa26 | ctg7180001664107_1632_SAC  | 6,121,954  | Atlantic - Scotland            |
| H600 | Ssa26 | ctg7180001804697_4461_SCT  | 29,506,080 | Atlantic - Cantabric           |
| H601 | Ssa26 | ctg7180001879095_18614_SGT | 29,547,999 | Atlantic - Cantabric           |
| H602 | Ssa27 | ctg7180001436605_2179_SCT  | 17,063,988 | Atlantic& Cantabric - Scotland |
| H603 | Ssa27 | ctg7180001436605_2724_SCT  | 17,064,533 | Atlantic& Cantabric - Scotland |
| H604 | Ssa27 | ctg7180001545651_306_SCT   | 17,070,515 | Atlantic - Scotland            |
| H605 | Ssa27 | ctg7180001545651_364_SGT   | 17,070,573 | Atlantic - Scotland            |

|      |              |                            |            |                                |
|------|--------------|----------------------------|------------|--------------------------------|
| H606 | <i>Ssa27</i> | ctg7180001545651_652_SCT   | 17,070,861 | Atlantic - Scotland            |
| H607 | <i>Ssa27</i> | ctg7180001576823_458_SCT   | 17,073,799 | Atlantic - Scotland            |
| H608 | <i>Ssa27</i> | ctg7180001869134_308_SAG   | 17,082,064 | Atlantic - Scotland            |
| H609 | <i>Ssa27</i> | ctg7180001583406_3778_SAG  | 17,093,128 | Atlantic - Scotland            |
| H610 | <i>Ssa27</i> | ctg7180001583406_2745_SAC  | 17,094,161 | Atlantic - Scotland            |
| H611 | <i>Ssa27</i> | ctg7180001583406_245_SCT   | 17,096,475 | Atlantic - Scotland            |
| H612 | <i>Ssa27</i> | ctg7180001210476_199_SGT   | 17,100,902 | Atlantic - Scotland            |
| H613 | <i>Ssa27</i> | ctg7180001213070_591_SCT   | 17,106,340 | Atlantic - Scotland            |
| H614 | <i>Ssa27</i> | ctg7180001890551_1421_SCT  | 17,114,269 | Atlantic - Scotland            |
| H615 | <i>Ssa27</i> | ctg7180001890551_1096_SAC  | 17,114,594 | Atlantic& Cantabrig - Scotland |
| H616 | <i>Ssa27</i> | ctg7180001890551_1036_SAG  | 17,114,654 | Atlantic& Cantabrig - Scotland |
| H617 | <i>Ssa27</i> | ctg7180001228300_461_SAC   | 17,121,458 | Atlantic - Scotland            |
| H618 | <i>Ssa27</i> | ctg7180001436526_972_SAC   | 17,129,093 | Atlantic - Scotland            |
| H619 | <i>Ssa27</i> | ctg7180001879469_2220_SCT  | 17,135,671 | Atlantic - Scotland            |
| H620 | <i>Ssa27</i> | ctg7180001879469_6161_SCT  | 17,139,612 | Atlantic - Scotland            |
| H621 | <i>Ssa27</i> | ctg7180001879469_6524_SCT  | 17,139,975 | Atlantic - Scotland            |
| H622 | <i>Ssa27</i> | ctg7180001817910_12905_SCT | 23,721,355 | Cantabrig - Scotland           |
| H623 | <i>Ssa28</i> | ctg7180001919998_1589_SCT  | 5,208,704  | Atlantic - Scotland            |
| H624 | <i>Ssa28</i> | ctg7180001854384_8001_SAC  | 7,152,154  | Cantabrig - Scotland           |
| H625 | <i>Ssa28</i> | ctg7180001854384_7628_SGT  | 7,152,527  | Cantabrig - Scotland           |
| H626 | <i>Ssa28</i> | ctg7180001854384_6223_SGT  | 7,153,932  | Cantabrig - Scotland           |
| H627 | <i>Ssa28</i> | ctg7180001913270_16239_SCT | 7,162,784  | Cantabrig - Scotland           |
| H628 | <i>Ssa29</i> | ctg7180001788132_886_SCT   | 31,989,744 | Atlantic - Scotland            |
| H629 | <i>Ssa29</i> | ctg7180001788132_2146_SGT  | 31,991,045 | Atlantic - Scotland            |
| H630 | <i>Ssa29</i> | ctg7180001337052_3998_SCT  | 32,047,897 | Cantabrig - Scotland           |

**Table S2.** Methods corresponding to the significant SNPs in Table S1 (significant for at least two haplotype-based methods). An asterisk indicates that the corresponding method detected the SNP as significant (SF: SmileFinder; sel: selscan).

| <b>Crom.</b> | <b>ID</b>                       | <b>nvd</b> | <b>SF</b> | <b>sel</b> | <b>EOS</b> | <b>Number</b> |
|--------------|---------------------------------|------------|-----------|------------|------------|---------------|
| <i>Ssa01</i> | H1 - H9, H13 - H14              | -          | *         | *          | -          | 2             |
| <i>Ssa01</i> | H10 - H12, H15 - H17, H25 - H28 | *          | *         | -          | -          | 2             |
| <i>Ssa01</i> | H18 - H24, H29 - H30            | *          | -         | *          | -          | 2             |
| <i>Ssa01</i> | H31 - H32                       | *          | -         | *          | *          | 3             |
| <i>Ssa03</i> | H33 - H36                       | -          | *         | *          | -          | 2             |
| <i>Ssa03</i> | H37, H44 - H51                  | *          | -         | *          | -          | 2             |
| <i>Ssa03</i> | H38 - H43                       | *          | *         | -          | -          | 2             |
| <i>Ssa04</i> | H52 - H65                       | -          | *         | *          | -          | 2             |
| <i>Ssa04</i> | H66 - H69, H84, H92 - H95       | *          | -         | *          | -          | 2             |
| <i>Ssa04</i> | H70 - H91                       | *          | -         | *          | *          | 3             |
| <i>Ssa05</i> | H96 - H104                      | *          | -         | *          | -          | 2             |
| <i>Ssa06</i> | H105 - H115                     | -          | *         | *          | -          | 2             |
| <i>Ssa07</i> | H116 - H124, H133 - H134        | *          | *         | -          | -          | 2             |
| <i>Ssa07</i> | H125, H132                      | -          | *         | *          | -          | 2             |
| <i>Ssa07</i> | H126 - H131                     | *          | -         | *          | -          | 2             |
| <i>Ssa08</i> | H135                            | *          | -         | *          | -          | 2             |

|              |                                                                                                            |   |   |   |   |   |
|--------------|------------------------------------------------------------------------------------------------------------|---|---|---|---|---|
| <i>Ssa09</i> | H136 - H159, H224 - H225                                                                                   | * | - | * | - | 2 |
| <i>Ssa09</i> | H160, H165, H167, H169 - H173, H176 - H180, H187, H195, H198 - H221, H223                                  | - | * | * | - | 2 |
| <i>Ssa09</i> | H161 - H164, H166, H168, H174 - H175, H181 - H186, H188 - H194, H196 - H197                                | * | * | * | - | 3 |
| <i>Ssa09</i> | H222                                                                                                       | * | * | - | - | 2 |
| <i>Ssa10</i> | H226                                                                                                       | * | * | - | * | 3 |
| <i>Ssa10</i> | H227 - H234                                                                                                | * | * | - | - | 2 |
| <i>Ssa10</i> | H235 - H240                                                                                                | * | - | * | - | 2 |
| <i>Ssa11</i> | H241 - H251                                                                                                | * | * | - | - | 2 |
| <i>Ssa11</i> | H252 - H253                                                                                                | * | * | * | - | 3 |
| <i>Ssa11</i> | H254, H257, H260, H273 - H274, H276 - H278, H280, H283 - H296, H303, H311 - H312, H314 - H323, H331 - H335 | - | * | * | - | 2 |
| <i>Ssa11</i> | H255 - H256, H259, H261 - H272, H275, H279, H281 - H282, H297 - H302, H304 - H310, H313, H324 - H325       | * | * | * | - | 3 |
| <i>Ssa11</i> | H326 - H330                                                                                                | * | - | * | - | 2 |
| <i>Ssa12</i> | H336, H338                                                                                                 | * | - | * | - | 2 |
| <i>Ssa12</i> | H337                                                                                                       | * | - | * | * | 3 |
| <i>Ssa13</i> | H339 - H340                                                                                                | * | * | - | - | 2 |
| <i>Ssa14</i> | H341 - H369                                                                                                | * | - | * | - | 2 |
| <i>Ssa15</i> | H370 - H371                                                                                                | * | * | - | - | 2 |
| <i>Ssa15</i> | H372 - H377                                                                                                | * | - | * | - | 2 |
| <i>Ssa16</i> | H378 - H385                                                                                                | * | - | * | - | 2 |
| <i>Ssa16</i> | H386 - H405                                                                                                | - | * | * | - | 2 |
| <i>Ssa17</i> | H406 - H407                                                                                                | * | - | * | - | 2 |
| <i>Ssa17</i> | H408 - H413, H418 - H426                                                                                   | * | * | - | - | 2 |
| <i>Ssa17</i> | H414 - H417, H427                                                                                          | - | * | * | - | 2 |
| <i>Ssa18</i> | H428                                                                                                       | * | * | - | - | 2 |
| <i>Ssa18</i> | H429 - H430                                                                                                | * | - | * | * | 3 |
| <i>Ssa18</i> | H431                                                                                                       | * | - | * | - | 2 |
| <i>Ssa19</i> | H432                                                                                                       | * | - | * | * | 3 |
| <i>Ssa19</i> | H433 - H436                                                                                                | * | - | * | - | 2 |
| <i>Ssa20</i> | H437 - H438, H440                                                                                          | * | - | * | - | 2 |
| <i>Ssa20</i> | H439, H441 - H443                                                                                          | * | * | - | - | 2 |
| <i>Ssa21</i> | H444 - H445                                                                                                | * | * | - | - | 2 |
| <i>Ssa21</i> | H446 - H449                                                                                                | - | * | * | - | 2 |
| <i>Ssa21</i> | H450 - H452                                                                                                | * | - | * | - | 2 |
| <i>Ssa22</i> | H453                                                                                                       | * | - | * | * | 3 |
| <i>Ssa22</i> | H454 - H473                                                                                                | * | - | * | - | 2 |
| <i>Ssa24</i> | H474 - H477, H485                                                                                          | * | - | * | - | 2 |
| <i>Ssa24</i> | H478, H480 - H538, H540 - H541                                                                             | - | * | * | - | 2 |
| <i>Ssa24</i> | H479, H488                                                                                                 | * | * | * | - | 3 |
| <i>Ssa24</i> | H539, H543 - H592                                                                                          | * | * | - | - | 2 |
| <i>Ssa25</i> | H593 - H594                                                                                                | - | * | * | - | 2 |
| <i>Ssa25</i> | H595 - H598                                                                                                | * | * | - | - | 2 |
| <i>Ssa26</i> | H599                                                                                                       | * | - | * | - | 2 |
| <i>Ssa26</i> | H600 - H601                                                                                                | * | * | - | - | 2 |
| <i>Ssa27</i> | H602 - H603                                                                                                | * | * | - | - | 2 |
| <i>Ssa27</i> | H604 - H614, H617 - H621                                                                                   | - | * | * | - | 2 |

|              |             |   |   |   |   |   |
|--------------|-------------|---|---|---|---|---|
| <i>Ssa27</i> | H615 - H616 | * | * | * | - | 3 |
| <i>Ssa27</i> | H622        | * | - | * | - | 2 |
| <i>Ssa28</i> | H623        | * | * | - | - | 2 |
| <i>Ssa28</i> | H624 - H627 | * | - | * | - | 2 |
| <i>Ssa29</i> | H628 - H630 | * | - | * | - | 2 |

**Table S3.** Candidate genes, corresponding significant SNPs and gene ontology (GO).

| Chromosome   | SNP ID (Table S1) | Name          | Alias             | GO term                                                                                                                                            |
|--------------|-------------------|---------------|-------------------|----------------------------------------------------------------------------------------------------------------------------------------------------|
| <i>Ssa01</i> | H1 - H9           | CIGSSA_002336 | <i>ldlrp1-b</i>   | Biological process                                                                                                                                 |
| <i>Ssa01</i> | H10 - H11         | CIGSSA_002782 | <i>lrrfip2</i>    | Metabolism.                                                                                                                                        |
| <i>Ssa01</i> | H12               | CIGSSA_002790 | <i>inpp5f</i>     | Localization.                                                                                                                                      |
| <i>Ssa01</i> | H13 - H17         | CIGSSA_005109 | <i>csgalnact2</i> | Development. Metabolism.                                                                                                                           |
| <i>Ssa01</i> | H18 - H23         | CIGSSA_003292 | <i>csmd1</i>      | Multicellular organic processes. Regulation. Development.                                                                                          |
| <i>Ssa01</i> | H25               | CIGSSA_003864 | <i>astn2</i>      | Localization.                                                                                                                                      |
| <i>Ssa01</i> | H26               | CIGSSA_003911 | <i>tmem132c</i>   | Cellular anatomical entity.                                                                                                                        |
| <i>Ssa01</i> | H29 - H32         | CIGSSA_004177 | <i>nek6</i>       | Cellular process.                                                                                                                                  |
| <i>Ssa03</i> | H33 - H35         | CIGSSA_016245 | <i>tpr</i>        | Cellular process.                                                                                                                                  |
|              |                   |               |                   | Cellular component biogenesis. Localization. Metabolic process. Cellular process. Negative regulation of biological process. Response to stimulus. |
| <i>Ssa03</i> | H37               | CIGSSA_016346 | <i>dip2c</i>      | Metabolic process.                                                                                                                                 |
| <i>Ssa03</i> | H38               | CIGSSA_016961 | <i>psmd3</i>      | Behaviour. Development. Metabolic process. Regulation of molecular function.                                                                       |
| <i>Ssa03</i> | H39               | CIGSSA_018885 | <i>pdk2</i>       | Development. Metabolic process. Cellular process. Regulation. Response to stimulus.                                                                |
| <i>Ssa03</i> | H43               | CIGSSA_018973 | <i>ccdc43</i>     | -                                                                                                                                                  |
| <i>Ssa03</i> | H44 - H50         | CIGSSA_018998 | <i>ttyh3a</i>     | Cellular anatomical entity. Localization                                                                                                           |
| <i>Ssa04</i> | H52 - H54         | CIGSSA_022723 | <i>spns2</i>      | Development. Localization. Cellular process. Regulation. Localization.                                                                             |
| <i>Ssa04</i> | H59 - H63         | CIGSSA_024135 | <i>abcg4b</i>     | Cellular anatomical entity.                                                                                                                        |
| <i>Ssa04</i> | H64 - H65         | CIGSSA_022727 | <i>c2cd2</i>      | Development. Metabolic process. Cellular process.                                                                                                  |
| <i>Ssa05</i> | H100 - H103       | CIGSSA_028974 | <i>pitx2</i>      | -                                                                                                                                                  |
| <i>Ssa06</i> | H107 - H115       | CIGSSA_033021 | <i>cep85l</i>     | Metabolic process.                                                                                                                                 |
| <i>Ssa07</i> | H125              | CIGSSA_037981 | <i>frrs1</i>      | Cellular process.                                                                                                                                  |
| <i>Ssa07</i> | H126              | CIGSSA_037982 | <i>pawr</i>       | Multicellular organismal process.                                                                                                                  |



|              |             |               |                  |                                                                                                                                                                                                                           |
|--------------|-------------|---------------|------------------|---------------------------------------------------------------------------------------------------------------------------------------------------------------------------------------------------------------------------|
| <i>Ssa07</i> | H132 - H133 | CIGSSA_037983 | <i>syt1</i>      | Cellular component<br>biogenesis. Behaviour.<br>Development.<br>Localization. Cellular<br>process. Regulation.<br>Cellular component<br>biogenesis. Cellular<br>anatomical entity. Cellular<br>process.                   |
| <i>Ssa09</i> | H136        | CIGSSA_045014 | <i>daam2</i>     | Cellular process.                                                                                                                                                                                                         |
| <i>Ssa09</i> | H137        | CIGSSA_045016 | <i>ppp1r13b</i>  | Cellular process.                                                                                                                                                                                                         |
| <i>Ssa09</i> | H138        | CIGSSA_043221 | <i>limch1</i>    | Cellular process.                                                                                                                                                                                                         |
| <i>Ssa09</i> | H140 - H142 | CIGSSA_043227 | <i>fst15</i>     | Cellular anatomical entity.                                                                                                                                                                                               |
| <i>Ssa09</i> | H157        | CIGSSA_045324 | <i>npm1</i>      | Cellular component<br>biogenesis. Development.<br>Localization. Metabolic<br>process. Cellular process.<br>T cell proliferation.<br>Regulation. Positive<br>regulation of biological<br>process. Response to<br>stimulus. |
| <i>Ssa09</i> | H158        | CIGSSA_045325 | <i>tlx2</i>      | Development. Metabolic<br>process.                                                                                                                                                                                        |
| <i>Ssa09</i> | H170 - H173 | CIGSSA_045334 | <i>ankrd50</i>   | Localization.                                                                                                                                                                                                             |
| <i>Ssa09</i> | H177 - H188 | CIGSSA_043270 | <i>fat4</i>      | Biological adhesion.<br>Development.                                                                                                                                                                                      |
| <i>Ssa09</i> | H209 - H212 | CIGSSA_043276 | <i>pcgf3</i>     | Development. Metabolic<br>process.                                                                                                                                                                                        |
| <i>Ssa09</i> | H222        | CIGSSA_043278 | <i>smu1</i>      | Cellular component<br>biogenesis. Metabolic<br>process. Cellular process.                                                                                                                                                 |
| <i>Ssa09</i> | H223        | CIGSSA_043279 | <i>tbc1d2</i>    | Cellular component<br>biogenesis. Localization.<br>Regulation.                                                                                                                                                            |
| <i>Ssa09</i> | H224        | CIGSSA_044147 | <i>cct6a</i>     | Protein complex. Cellular<br>process.                                                                                                                                                                                     |
| <i>Ssa09</i> | H225        | CIGSSA_046259 | <i>cltcb</i>     | Localization.<br>Developmental process.                                                                                                                                                                                   |
| <i>Ssa10</i> | H228 - H229 | CIGSSA_051679 | <i>tab3</i>      | Cellular process.                                                                                                                                                                                                         |
| <i>Ssa10</i> | H231        | CIGSSA_051680 | <i>fam150a</i>   | Development. Cellular<br>process.                                                                                                                                                                                         |
| <i>Ssa10</i> | H233        | CIGSSA_050022 | <i>obscna</i>    | Development. Cellular<br>process.                                                                                                                                                                                         |
| <i>Ssa10</i> | H234        | CIGSSA_050051 | <i>fam163a</i>   | -                                                                                                                                                                                                                         |
| <i>Ssa10</i> | H235 - H236 | CIGSSA_050714 | <i>osbpl5</i>    | Localization.                                                                                                                                                                                                             |
| <i>Ssa10</i> | H237        | CIGSSA_052850 | <i>nup205</i>    | Cellular component<br>biogenesis. Cellular<br>process.                                                                                                                                                                    |
| <i>Ssa10</i> | H239        | CIGSSA_051263 | <i>atp6v1e1b</i> | Development.<br>Localization. Response to<br>stress.                                                                                                                                                                      |
| <i>Ssa11</i> | H256 - H264 | CIGSSA_057338 | <i>wdr43</i>     | Cellular component<br>biogenesis. Development.                                                                                                                                                                            |

|              |             |               |                    |                                                                   |
|--------------|-------------|---------------|--------------------|-------------------------------------------------------------------|
| <i>Ssa11</i> | H269        | CIGSSA_055817 | <i>trmt61b</i>     | Localization. Regulation.                                         |
| <i>Ssa11</i> | H270 - H276 | CIGSSA_055818 | <i>aats-glupro</i> | Reproducción. Immune system process.                              |
| <i>Ssa11</i> | H281        | CIGSSA_055820 | <i>glo1</i>        | Binding. Cellular process.                                        |
|              |             |               |                    | Protein complex.                                                  |
|              |             |               |                    | Development. Metabolic process. Cellular process.                 |
|              |             |               |                    | Immune system process.                                            |
| <i>Ssa11</i> | H295 - H300 | CIGSSA_055823 | <i>zfand3</i>      | Binding.                                                          |
| <i>Ssa11</i> | H304 - H325 | CIGSSA_055824 | <i>mdga1</i>       | Cellular component biogenesis. Development.                       |
| <i>Ssa11</i> | H326        | CIGSSA_055831 | <i>syt24</i>       | -                                                                 |
| <i>Ssa11</i> | H328 - H330 | CIGSSA_055848 | <i>nell1</i>       | Cellular component biogenesis. Cellular anatomical entity.        |
|              |             |               |                    | Metabolic process.                                                |
|              |             |               |                    | Cellular process.                                                 |
|              |             |               |                    | Multicellular organismal process. T cell proliferation.           |
| <i>Ssa11</i> | H334 - H335 | CIGSSA_056993 | <i>dlg4</i>        | Cellular component biogenesis. Behaviour. Development.            |
|              |             |               |                    | Localization. Cellular process. Multicellular organismal process. |
|              |             |               |                    | Regulation. Response to stimulus.                                 |
| <i>Ssa12</i> | H337        | CIGSSA_063584 | <i>pltp</i>        | Metabolic process.                                                |
|              |             |               |                    | Multicellular organismal process.                                 |
| <i>Ssa12</i> | H338        | CIGSSA_061951 | <i>pcif1</i>       | Cellular process.                                                 |
| <i>Ssa13</i> | H339 - H340 | CIGSSA_067684 | <i>arghap32</i>    | Cellular anatomical entity.                                       |
| <i>Ssa14</i> | H346        | CIGSSA_075128 | <i>s10ae</i>       | Localization.                                                     |
| <i>Ssa14</i> | H366        | CIGSSA_075129 | <i>sirpa</i>       | Biological adhesion.                                              |
|              |             |               |                    | Cellular component biogenesis. Localization.                      |
|              |             |               |                    | Cellular process. Immune system process.                          |
| <i>Ssa14</i> | H367 - H368 | CIGSSA_075230 | <i>thrb</i>        | Development.                                                      |
| <i>Ssa15</i> | H372 - H373 | CIGSSA_080580 | <i>espn</i>        | Cellular process.                                                 |
| <i>Ssa15</i> | H375 - H376 | CIGSSA_080784 | <i>hdac7</i>       | Development. Metabolic process.                                   |
|              |             |               |                    | Metabolic process.                                                |
| <i>Ssa15</i> | H377        | CIGSSA_079459 | <i>plch2</i>       | Cellular process.                                                 |
|              |             |               |                    | Cellular component biogenesis. Development.                       |
| <i>Ssa16</i> | H385        | CIGSSA_085229 | <i>mef2a</i>       | Localization. Metabolic process. Cellular process.                |
|              |             |               |                    | Multicellular organismal process.                                 |
| <i>Ssa16</i> | H386 - H388 | CIGSSA_085235 | <i>calb2</i>       | Regulation.                                                       |

|              |             |               |                   |                                                                                                                                                 |
|--------------|-------------|---------------|-------------------|-------------------------------------------------------------------------------------------------------------------------------------------------|
| <i>Ssa16</i> | H389 - H400 | CIGSSA_083859 | <i>hydin</i>      | Cellular process.                                                                                                                               |
| <i>Ssa16</i> | H401 - H402 | CIGSSA_083860 | <i>necab2</i>     | Cellular process.                                                                                                                               |
| <i>Ssa16</i> | H403 - H404 | CIGSSA_085238 | <i>pskh1</i>      | Cellular process.                                                                                                                               |
| <i>Ssa17</i> | H406 - H407 | CIGSSA_088719 | <i>cpb2</i>       | Metabolic process.<br>Cellular process. Response to stress.                                                                                     |
| <i>Ssa17</i> | H408        | CIGSSA_088733 | <i>gsk3b</i>      | Development. Cellular process.                                                                                                                  |
| <i>Ssa17</i> | H409        | CIGSSA_089957 | <i>trappc10</i>   | Localization.                                                                                                                                   |
| <i>Ssa17</i> | H418 - H419 | CIGSSA_088840 | <i>casq2</i>      | Cellular component biogenesis. Development. Localization. Cellular process. Multicellular organismal process. Regulation. Response to stimulus. |
| <i>Ssa17</i> | H421 - H422 | CIGSSA_090047 | <i>vangl1</i>     | Development. Cellular anatomical entity.                                                                                                        |
| <i>Ssa17</i> | H423        | CIGSSA_090048 | <i>vangl2</i>     | Cellular component biogenesis. Development. Cellular anatomical entity. Localization. Cellular process.                                         |
| <i>Ssa17</i> | H424        | CIGSSA_090049 | <i>vangl3</i>     | Cellular anatomical entity.                                                                                                                     |
| <i>Ssa17</i> | H425 - H426 | CIGSSA_090050 | <i>vangl4</i>     | Cellular anatomical entity.                                                                                                                     |
| <i>Ssa18</i> | H428        | CIGSSA_092658 | <i>pprc1</i>      | Metabolic process.<br>Cellular process. Positive regulation of biological process.                                                              |
| <i>Ssa18</i> | H429 - H431 | CIGSSA_093469 | <i>pfdn2</i>      | Cellular process.                                                                                                                               |
| <i>Ssa19</i> | H433        | CIGSSA_096823 | <i>lrit1a</i>     | -                                                                                                                                               |
| <i>Ssa20</i> | H439        | CIGSSA_102235 | <i>card9</i>      | Cellular process.                                                                                                                               |
| <i>Ssa20</i> | H440        | CIGSSA_101013 | <i>sgsm1</i>      | Cellular component biogenesis. Localization. Metabolic process. Regulation.                                                                     |
| <i>Ssa20</i> | H441        | CIGSSA_101587 | <i>zgc:158328</i> | -                                                                                                                                               |
| <i>Ssa20</i> | H442 - H443 | CIGSSA_102872 | <i>mecom</i>      | Development. Metabolic process.                                                                                                                 |
| <i>Ssa21</i> | H444        | CIGSSA_105802 | <i>scn2a</i>      | Binding. Development. Localization. Cellular process. Regulation. Metabolic process.                                                            |
| <i>Ssa21</i> | H445        | CIGSSA_105808 | <i>b3galt1</i>    | -                                                                                                                                               |
| <i>Ssa21</i> | H446 - H449 | CIGSSA_105813 | <i>col28a1a</i>   | -                                                                                                                                               |
| <i>Ssa21</i> | H450        | CIGSSA_106830 | <i>clasp1</i>     | Biological adhesion. Cellular component biogenesis. Development. Localization. Cellular process. Multicellular organismal process.              |
| <i>Ssa21</i> | H452        | CIGSSA_106235 | <i>farp1</i>      | Cellular anatomical entity.                                                                                                                     |
| <i>Ssa22</i> | H453 - H457 | CIGSSA_108521 | <i>ccdc3</i>      | Cellular process.<br>Cellular component                                                                                                         |

|              |             |               |                  |                                                            |
|--------------|-------------|---------------|------------------|------------------------------------------------------------|
| <i>Ssa22</i> | H460 - H461 | CIGSSA_109442 | <i>kcc1a</i>     | biogenesis. Metabolic process.                             |
| <i>Ssa22</i> | H462        | CIGSSA_108522 | <i>nek4</i>      | -                                                          |
| <i>Ssa22</i> | H471        | CIGSSA_109445 | <i>phc2b</i>     | Cellular process.                                          |
| <i>Ssa22</i> | H472 - H473 | CIGSSA_108626 | <i>eefsec</i>    | -                                                          |
| <i>Ssa24</i> | H474        | CIGSSA_114324 | <i>hps4</i>      | Metabolic process.                                         |
|              |             |               |                  | Cellular component biogenesis. Cellular anatomical entity. |
|              |             |               |                  | Localization.                                              |
|              |             |               |                  | Pigmentation. Cellular process. Regulation.                |
|              |             |               |                  | Response to stress.                                        |
| <i>Ssa24</i> | H475        | CIGSSA_115013 | <i>slc25a25</i>  | Localization.                                              |
| <i>Ssa24</i> | H478        | CIGSSA_114350 | <i>ppp6c</i>     | Response to stress.                                        |
| <i>Ssa24</i> | H480 - H482 | CIGSSA_114351 | <i>golga1</i>    | Localization.                                              |
| <i>Ssa24</i> | H483 - H484 | CIGSSA_114352 | <i>rpl35</i>     | Binding. Metabolic process.                                |
| <i>Ssa24</i> | H492        | CIGSSA_115020 | <i>ofml2a</i>    | -                                                          |
| <i>Ssa24</i> | H493 - H499 | CIGSSA_114353 | <i>nr6a1a</i>    | Development.                                               |
|              |             |               |                  | Localization. Metabolic process. Cellular process.         |
|              |             |               |                  | Response to stimulus.                                      |
| <i>Ssa24</i> | H500 - H501 | CIGSSA_115024 | <i>adgrd2</i>    | Cellular process.                                          |
| <i>Ssa24</i> | H514        | CIGSSA_115025 | <i>lhx2</i>      | Anatomical structure development. Metabolic process.       |
| <i>Ssa24</i> | H515        | CIGSSA_115026 | <i>crb2a</i>     | Biological adhesion.                                       |
|              |             |               |                  | Development.                                               |
|              |             |               |                  | Localization. Cellular process.                            |
| <i>Ssa24</i> | H517        | CIGSSA_114356 | <i>zgc:55461</i> | Cellular process. Multi-organism process.                  |
| <i>Ssa24</i> | H518        | CIGSSA_115029 | <i>bcl2l1</i>    | Binding. Development.                                      |
|              |             |               |                  | Cellular process.                                          |
|              |             |               |                  | Regulation.                                                |
| <i>Ssa24</i> | H519 - H520 | CIGSSA_115033 | <i>fkbp15</i>    | Localization. Cellular process.                            |
| <i>Ssa24</i> | H539        | CIGSSA_115870 | <i>enp2</i>      | Metabolic process.                                         |
| <i>Ssa24</i> | H531 - H532 | CIGSSA_114357 | <i>nelfb</i>     | Development.                                               |
| <i>Ssa24</i> | H533 - H541 | CIGSSA_114360 | <i>cacna1ba</i>  | Localization. Regulation.                                  |
|              |             |               |                  | Cellular component biogenesis. Cellular process.           |
| <i>Ssa24</i> | H546 - H564 | CIGSSA_114431 | <i>mfge8b</i>    | Biological adhesion.                                       |
| <i>Ssa24</i> | H569 - H585 | CIGSSA_114432 | <i>hapln1</i>    | Biological adhesion.                                       |
|              |             |               |                  | Cellular component biogenesis. Development.                |
|              |             |               |                  | Metabolic process.                                         |
|              |             |               |                  | Cellular process.                                          |
|              |             |               |                  | Multicellular organismal process. Response to              |

|              |             |               |                 |                                                                                                                                   |
|--------------|-------------|---------------|-----------------|-----------------------------------------------------------------------------------------------------------------------------------|
| <i>Ssa24</i> | H586 - H592 | CIGSSA_115109 | <i>vcn</i>      | stimulus.<br>Biological adhesion.<br>Development. Cellular<br>process. Multicellular<br>organismal process.<br>Metabolic process. |
| <i>Ssa25</i> | H593 - H594 | CIGSSA_116392 | <i>lrrfip1a</i> |                                                                                                                                   |
| <i>Ssa25</i> | H595 - H596 | CIGSSA_116729 | <i>mospd2</i>   | -                                                                                                                                 |
| <i>Ssa25</i> | H597        | CIGSSA_116730 | <i>gpr143</i>   | Cellular process.                                                                                                                 |
| <i>Ssa26</i> | H599        | CIGSSA_119826 | <i>prmt3</i>    | Cellular process.                                                                                                                 |
| <i>Ssa26</i> | H601        | CIGSSA_119296 | <i>cyld</i>     | Metabolic process.<br>Development. Cellular<br>process.                                                                           |
| <i>Ssa28</i> | H623        | CIGSSA_124485 | <i>wapa1</i>    | Intracellular component.                                                                                                          |
| <i>Ssa29</i> | H628 - H630 | CIGSSA_126794 | <i>mtrr</i>     | Metabolic process.                                                                                                                |

---

**Table S4.** SNPs in chromosome *Ssa25*.

| <b>Id</b> | <b>SNP</b>                 | <b>BP</b> |
|-----------|----------------------------|-----------|
| 25_0      | ctg7180001935593_3805_SCT  | 40203     |
| 25_1      | ctg7180001855357_14284_SGT | 50632     |
| 25_2      | ctg7180001877470_10613_SCT | 67559     |
| 25_3      | ctg7180001877470_8497_SAC  | 69675     |
| 25_4      | ctg7180001764704_504_SAC   | 89443     |
| 25_5      | ctg7180001764704_74_SAC    | 89873     |
| 25_6      | ctg7180001496214_1916_SCT  | 100308    |
| 25_7      | ctg7180001877879_1317_SAG  | 174112    |
| 25_8      | ctg7180001826470_6832_SCT  | 181905    |
| 25_9      | ctg7180001837775_6202_SAC  | 248468    |
| 25_10     | ctg7180001926624_1920_SAC  | 270664    |
| 25_11     | ctg7180001926624_693_SAC   | 271891    |
| 25_12     | ctg7180001936426_13596_SAG | 279600    |
| 25_13     | ctg7180001714329_1196_SGT  | 316193    |
| 25_14     | ctg7180001932127_11853_SAG | 323428    |
| 25_15     | ctg7180001370096_954_SAC   | 359473    |
| 25_16     | ctg7180001370096_1418_SAC  | 359937    |
| 25_17     | ctg7180001370096_3431_SCT  | 361950    |
| 25_18     | ctg7180001773173_1544_SCT  | 374530    |
| 25_19     | ctg7180001804499_3552_SCT  | 379156    |
| 25_20     | ctg7180001805524_6739_SCT  | 421269    |
| 25_21     | ctg7180001805524_7463_SGT  | 421993    |
| 25_22     | ctg7180001805524_8317_SAC  | 422847    |
| 25_23     | ctg7180001805524_9011_SAG  | 423541    |
| 25_24     | ctg7180001805524_9801_SAG  | 424331    |
| 25_25     | ctg7180001805524_13771_SCT | 428301    |
| 25_26     | ctg7180001805524_16608_SGT | 431138    |
| 25_27     | ctg7180001764591_2672_SAC  | 441116    |
| 25_28     | ctg7180001932318_10112_SGT | 462904    |
| 25_29     | ctg7180001890657_9608_SCT  | 475098    |
| 25_30     | ctg7180001890657_835_SAC   | 483871    |
| 25_31     | ctg7180001490221_1801_SGT  | 484975    |

|       |                            |        |
|-------|----------------------------|--------|
| 25_32 | ctg7180001615657_277_SCT   | 487036 |
| 25_33 | ctg7180001833143_5424_SCT  | 495903 |
| 25_34 | ctg7180001339448_2744_SGT  | 513300 |
| 25_35 | ctg7180001891049_10685_SAG | 544876 |
| 25_36 | ctg7180001557515_393_SCT   | 545814 |
| 25_37 | ctg7180001911356_10126_SGT | 562519 |
| 25_38 | ctg7180001911356_12608_SAC | 565001 |
| 25_39 | ctg7180001234870_2258_SGT  | 610446 |
| 25_40 | ctg7180001709308_265_SCT   | 639308 |
| 25_41 | ctg7180001709308_103_SCT   | 639470 |
| 25_42 | ctg7180001374476_734_SCT   | 640743 |
| 25_43 | ctg7180001883172_3488_SCT  | 651177 |
| 25_44 | ctg7180001488992_11478_SCT | 720052 |
| 25_45 | ctg7180001872751_6149_SAG  | 726530 |
| 25_46 | ctg7180001501644_3619_SAC  | 741429 |
| 25_47 | ctg7180001794297_12438_SGT | 758409 |
| 25_48 | ctg7180001794297_12291_SGT | 758556 |
| 25_49 | ctg7180001794297_9805_SAG  | 761042 |
| 25_50 | ctg7180001795472_13025_SAC | 774453 |
| 25_51 | ctg7180001871227_517_SCT   | 791189 |
| 25_52 | ctg7180001871226_16417_SCT | 793799 |
| 25_53 | ctg7180001871226_13024_SCT | 797192 |
| 25_54 | ctg7180001871226_10403_SAG | 799813 |
| 25_55 | ctg7180001871225_4858_SAG  | 821223 |
| 25_56 | ctg7180001871225_3110_SGT  | 822971 |
| 25_57 | ctg7180001858998_1423_SCT  | 881883 |
| 25_58 | ctg7180001858998_3454_SAG  | 883914 |
| 25_59 | ctg7180001428206_6299_SAG  | 899025 |
| 25_60 | ctg7180001226125_1390_SAG  | 901905 |
| 25_61 | ctg7180001226125_1983_SCT  | 902230 |
| 25_62 | ctg7180001226125_813_SAG   | 903400 |
| 25_63 | ctg7180001226125_690_SCT   | 903523 |
| 25_64 | ctg7180001226125_484_SGT   | 903729 |
| 25_65 | ctg7180001900984_7602_SGT  | 906472 |
| 25_66 | ctg7180001900984_7401_SAG  | 906673 |

|        |                            |         |
|--------|----------------------------|---------|
| 25_67  | ctg7180001900984_6732_SAG  | 907342  |
| 25_68  | ctg7180001900984_5272_SAG  | 908802  |
| 25_69  | ctg7180001900984_2074_SAG  | 912000  |
| 25_70  | ctg7180001898685_682_SCT   | 914548  |
| 25_71  | ctg7180001898685_4929_SAG  | 918795  |
| 25_72  | ctg7180001898685_13191_SCT | 927057  |
| 25_73  | ctg7180001898685_17511_SCT | 931377  |
| 25_74  | ctg7180001918913_4985_SAC  | 951691  |
| 25_75  | ctg7180001918913_3383_SAG  | 953293  |
| 25_76  | ctg7180001886069_6600_SCT  | 958576  |
| 25_77  | ctg7180001814145_749_SGT   | 968451  |
| 25_78  | ctg7180001814145_1197_SCT  | 968899  |
| 25_79  | ctg7180001814145_3951_SCT  | 971653  |
| 25_80  | ctg7180001814145_4131_SCT  | 971833  |
| 25_81  | ctg7180001814145_4468_SAC  | 972170  |
| 25_82  | ctg7180001814145_7361_SAC  | 975063  |
| 25_83  | ctg7180001915746_2340_SCT  | 994752  |
| 25_84  | ctg7180001822550_2417_SAC  | 1370599 |
| 25_85  | ctg7180001886582_954_SCT   | 1543728 |
| 25_86  | ctg7180001832349_7185_SAG  | 1635925 |
| 25_87  | ctg7180001287511_1263_SGT  | 1644437 |
| 25_88  | ctg7180001742262_357_SAG   | 1666648 |
| 25_89  | ctg7180001886963_1717_SCT  | 1671066 |
| 25_90  | ctg7180001886963_2080_SAC  | 1671429 |
| 25_91  | ctg7180001871095_56_SAC    | 1735994 |
| 25_92  | ctg7180001871095_1439_SAG  | 1737377 |
| 25_93  | ctg7180001871095_2199_SCT  | 1738172 |
| 25_94  | ctg7180001929449_3300_SCT  | 1749509 |
| 25_95  | ctg7180001325578_800_SCT   | 1767418 |
| 25_96  | ctg7180001658479_531_SAG   | 1782949 |
| 25_97  | ctg7180001904413_305_SAG   | 1786421 |
| 25_98  | ctg7180001903113_1550_SAG  | 1807164 |
| 25_99  | ctg7180001811099_299_SAC   | 1857091 |
| 25_100 | ctg7180001811099_864_SGT   | 1857656 |
| 25_101 | ctg7180001881179_5171_SGT  | 1898257 |



|        |                            |         |
|--------|----------------------------|---------|
| 25_102 | ctg7180001881179_5311_SAC  | 1898397 |
| 25_103 | ctg7180001547313_547_SAG   | 1920679 |
| 25_104 | ctg7180001817734_500_SCT   | 1931303 |
| 25_105 | ctg7180001900935_1854_SCT  | 1947697 |
| 25_106 | ctg7180001900935_7501_SAG  | 1953344 |
| 25_107 | ctg7180001918404_14204_SCT | 1966129 |
| 25_108 | ctg7180001918404_2349_SAG  | 1977984 |
| 25_109 | ctg7180001290487_2691_SCT  | 1987177 |
| 25_110 | ctg7180001800687_3254_SAG  | 2013408 |
| 25_111 | ctg7180001339452_13356_SAG | 2017838 |
| 25_112 | ctg7180001717994_9199_SCT  | 2035385 |
| 25_113 | ctg7180001717994_8748_SAG  | 2035836 |
| 25_114 | ctg7180001717994_6413_SAG  | 2038171 |
| 25_115 | ctg7180001717994_5832_SAG  | 2038752 |
| 25_116 | ctg7180001717994_2906_SAC  | 2041678 |
| 25_117 | ctg7180001873181_1683_SGT  | 2052584 |
| 25_118 | ctg7180001440554_1293_SAC  | 2055199 |
| 25_119 | ctg7180001901671_5129_SCT  | 2064514 |
| 25_120 | ctg7180001789746_576_SGT   | 2069076 |
| 25_121 | ctg7180001820983_1044_SCT  | 2077918 |
| 25_122 | ctg7180001820983_1482_SAC  | 2078356 |
| 25_123 | ctg7180001827118_4677_SGT  | 2126484 |
| 25_124 | ctg7180001902892_11036_SAG | 2170372 |
| 25_125 | ctg7180001902892_11218_SGT | 2170554 |
| 25_126 | ctg7180001817801_6204_SCT  | 2209383 |
| 25_127 | ctg7180001917382_3952_SGT  | 2220242 |
| 25_128 | ctg7180001910534_11503_SAG | 2229425 |
| 25_129 | ctg7180001910534_11474_SAC | 2229454 |
| 25_130 | ctg7180001910534_11321_SAC | 2229607 |
| 25_131 | ctg7180001910534_11209_SCT | 2229719 |
| 25_132 | ctg7180001904850_3009_SGT  | 2249819 |
| 25_133 | ctg7180001927082_10542_SAG | 2318725 |
| 25_134 | ctg7180001927082_7529_SAG  | 2321684 |
| 25_135 | ctg7180001286864_1966_SCT  | 2354974 |
| 25_136 | ctg7180001286864_2454_SAG  | 2355462 |

|        |                               |         |
|--------|-------------------------------|---------|
| 25_137 | ctg7180001875250_2781_SAC     | 2387434 |
| 25_138 | ctg7180001875250_2951_SAG     | 2387604 |
| 25_139 | ctg7180001875250_5562_SGT     | 2390215 |
| 25_140 | ctg7180001883843_8792_SAG     | 2415600 |
| 25_141 | ctg7180001549796_1880_SCT     | 2424778 |
| 25_142 | ctg7180001549796_6484_SCT     | 2429382 |
| 25_143 | ctg7180001805637_4034_SGT     | 2539703 |
| 25_144 | ctg7180001805637_3423_SCT     | 2540314 |
| 25_145 | ctg7180001805637_3278_SCT     | 2540459 |
| 25_146 | ctg7180001490778_370_SAC      | 2548288 |
| 25_147 | ctg7180001871596_109192572762 |         |
| 25_148 | ctg7180001829711_831_SAG      | 2584792 |
| 25_149 | ctg7180001829711_886_SCT      | 2584847 |
| 25_150 | ctg7180001872191_7613_SGT     | 2608865 |
| 25_151 | ctg7180001214221_4284_SAG     | 2649673 |
| 25_152 | ctg7180001692300_409_SAG      | 2677776 |
| 25_153 | ctg7180001692300_1475_SCT     | 2678842 |
| 25_154 | ctg7180001692300_4475_SCT     | 2681842 |
| 25_155 | ctg7180001839087_612_SGT      | 2727442 |
| 25_156 | ctg7180001839087_961_SAG      | 2727791 |
| 25_157 | ctg7180001763875_1707_SGT     | 2737167 |
| 25_158 | ctg7180001868897_7728_SAG     | 2750567 |
| 25_159 | ctg7180001868897_2174_SAC     | 2756121 |
| 25_160 | ctg7180001910905_1337_SCT     | 2774019 |
| 25_161 | ctg7180001910905_2259_SAC     | 2774941 |
| 25_162 | ctg7180001910905_2964_SCT     | 2775646 |
| 25_163 | ctg7180001910905_8823_SAG     | 2781505 |
| 25_164 | ctg7180001910905_18840_SAC    | 2791522 |
| 25_165 | ctg7180001910534_2984_SCT     | 2800113 |
| 25_166 | ctg7180001820176_6140_SAG     | 2817561 |
| 25_167 | ctg7180001228299_4344_SAC     | 2828121 |
| 25_168 | ctg7180001228299_6174_SAG     | 2829951 |
| 25_169 | ctg7180001846957_7799_SCT     | 2855830 |
| 25_170 | ctg7180001850041_13884_SAG    | 2890250 |
| 25_171 | ctg7180001850041_10004_SGT    | 2894130 |

|        |                            |         |
|--------|----------------------------|---------|
| 25_172 | ctg7180001931081_2185_SGT  | 2933125 |
| 25_173 | ctg7180001931081_2872_SCT  | 2933812 |
| 25_174 | ctg7180001931081_3223_SAC  | 2934163 |
| 25_175 | ctg7180001931081_4720_SGT  | 2935660 |
| 25_176 | ctg7180001931081_6512_SCT  | 2937452 |
| 25_177 | ctg7180001901727_2759_SAC  | 2990508 |
| 25_178 | ctg7180001935758_2726_SAG  | 3002167 |
| 25_179 | ctg7180001507916_1359_SAG  | 3065430 |
| 25_180 | ctg7180001841444_5634_SCT  | 3072255 |
| 25_181 | ctg7180001345614_2505_SAG  | 3088526 |
| 25_182 | ctg7180001924168_185_SAG   | 3097815 |
| 25_183 | ctg7180001915454_1245_SCT  | 3119557 |
| 25_184 | ctg7180001805729_5017_SCT  | 3124845 |
| 25_185 | ctg7180001861707_14025_SCT | 3133435 |
| 25_186 | ctg7180001861707_13603_SCT | 3133857 |
| 25_187 | ctg7180001861707_11802_SAG | 3135658 |
| 25_188 | ctg7180001861707_11757_SAG | 3135703 |
| 25_189 | ctg7180001876896_4415_SAG  | 3225640 |
| 25_190 | ctg7180001244499_1945_SCT  | 3237519 |
| 25_191 | ctg7180001869686_6066_SAG  | 3295635 |
| 25_192 | ctg7180001919467_1821_SAG  | 3348902 |
| 25_193 | ctg7180001884727_2152_SAG  | 3377299 |
| 25_194 | ctg7180001916740_552_SCT   | 3508536 |
| 25_195 | ctg7180001916740_601_SCT   | 3508585 |
| 25_196 | ctg7180001916740_8079_SAG  | 3516063 |
| 25_197 | ctg7180001452310_421_SCT   | 3533346 |
| 25_198 | ctg7180001669659_1323_SAC  | 3553048 |
| 25_199 | ctg7180001589299_335_SCT   | 3555749 |
| 25_200 | ctg7180001492932_6126_SAG  | 3564707 |
| 25_201 | ctg7180001492932_3379_SGT  | 3567454 |
| 25_202 | ctg7180001861920_5630_SCT  | 3580304 |
| 25_203 | ctg7180001810033_732_SGT   | 3613942 |
| 25_204 | ctg7180001900606_4654_SCT  | 3663420 |
| 25_205 | ctg7180001893046_13772_SGT | 3708514 |
| 25_206 | ctg7180001645886_1219_SAC  | 3724425 |

|        |                            |         |
|--------|----------------------------|---------|
| 25_207 | ctg7180001454729_3659_SGT  | 3751169 |
| 25_208 | ctg7180001804470_10163_SAG | 3762058 |
| 25_209 | ctg7180001914198_1339_SAC  | 3780470 |
| 25_210 | ctg7180001915823_11026_SAG | 3801190 |
| 25_211 | ctg7180001915823_11330_SGT | 3801494 |
| 25_212 | ctg7180001915823_11364_SGT | 3801528 |
| 25_213 | ctg7180001891582_4194_SCT  | 3827188 |
| 25_214 | ctg7180001901921_3973_SAC  | 3866966 |
| 25_215 | ctg7180001880024_5101_SAC  | 3954961 |
| 25_216 | ctg7180001880024_4634_SAC  | 3955428 |
| 25_217 | ctg7180001880024_4342_SGT  | 3955720 |
| 25_218 | ctg7180001933032_19790_SAG | 3973022 |
| 25_219 | ctg7180001933032_18791_SAC | 3974021 |
| 25_220 | ctg7180001933032_8676_SCT  | 3984136 |
| 25_221 | ctg7180001824328_2983_SCT  | 4055785 |
| 25_222 | ctg7180001824328_5583_SAG  | 4058422 |
| 25_223 | ctg7180001824328_11067_SCT | 4063870 |
| 25_224 | ctg7180001898803_4794_SAG  | 4104275 |
| 25_225 | ctg7180001898803_3446_SGT  | 4105623 |
| 25_226 | ctg7180001242022_2228_SAG  | 4117809 |
| 25_227 | ctg7180001931398_17043_SGT | 4123300 |
| 25_228 | ctg7180001388717_3206_SGT  | 4138862 |
| 25_229 | ctg7180001876853_2669_SGT  | 4161325 |
| 25_230 | ctg7180001935278_3613_SCT  | 4187950 |
| 25_231 | ctg7180001834284_4057_SAC  | 4214026 |
| 25_232 | ctg7180001834284_767_SGT   | 4217316 |
| 25_233 | ctg7180001834284_732_SAC   | 4217351 |
| 25_234 | ctg7180001834284_328_SAG   | 4217755 |
| 25_235 | ctg7180001816812_16119_SAC | 4252370 |
| 25_236 | ctg7180001842599_3140_SCT  | 4273168 |
| 25_237 | ctg7180001842599_3820_SCT  | 4273848 |
| 25_238 | ctg7180001842599_5951_SCT  | 4275979 |
| 25_239 | ctg7180001794302_4121_SGT  | 4326746 |
| 25_240 | ctg7180001909521_6667_SGT  | 4342222 |
| 25_241 | ctg7180001909521_6711_SCT  | 4342266 |

|        |                            |         |
|--------|----------------------------|---------|
| 25_242 | ctg7180001909521_6920_SGT  | 4342475 |
| 25_243 | ctg7180001909521_11955_SAG | 4347510 |
| 25_244 | ctg7180001928602_14997_SGT | 4423806 |
| 25_245 | ctg7180001928602_14905_SAC | 4423898 |
| 25_246 | ctg7180001928602_13705_SGT | 4425098 |
| 25_247 | ctg7180001928602_13540_SCT | 4425263 |
| 25_248 | ctg7180001921938_4561_SAC  | 4536848 |
| 25_249 | ctg7180001881900_16683_SAC | 4574508 |
| 25_250 | ctg7180001881900_15008_SAC | 4576183 |
| 25_251 | ctg7180001881900_14971_SCT | 4576220 |
| 25_252 | ctg7180001881900_14502_SAC | 4576689 |
| 25_253 | ctg7180001881900_10144_SCT | 4581047 |
| 25_254 | ctg7180001881900_8805_SAG  | 4582386 |
| 25_255 | ctg7180001788314_3766_SCT  | 4638396 |
| 25_256 | ctg7180001788314_3174_SAG  | 4638988 |
| 25_257 | ctg7180001788314_316_SCT   | 4641846 |
| 25_258 | ctg7180001937184_33332_SAG | 4663094 |
| 25_259 | ctg7180001937184_564_SCT   | 4697705 |
| 25_260 | ctg7180001804479_4304_SGT  | 4702624 |
| 25_261 | ctg7180001907427_9929_SCT  | 4729039 |
| 25_262 | ctg7180001852893_3473_SAC  | 4740908 |
| 25_263 | ctg7180001937542_21700_SCT | 4760675 |
| 25_264 | ctg7180001937542_21396_SAG | 4760979 |
| 25_265 | ctg7180001937542_18096_SCT | 4764279 |
| 25_266 | ctg7180001937542_17814_SCT | 4764561 |
| 25_267 | ctg7180001937542_17680_SGT | 4775779 |
| 25_268 | ctg7180001937542_5324_SCT  | 4777051 |
| 25_269 | ctg7180001937542_4814_SAC  | 4777561 |
| 25_270 | ctg7180001937540_15596_SAG | 4900891 |
| 25_271 | ctg7180001937540_13874_SAC | 4902614 |
| 25_272 | ctg7180001937540_8867_SAG  | 4907622 |
| 25_273 | ctg7180001937540_3950_SCT  | 4912539 |
| 25_274 | ctg7180001892317_7435_SAG  | 4921779 |
| 25_275 | ctg7180001892317_667_SCT   | 4928547 |
| 25_276 | ctg7180001636798_1175_SCT  | 4930575 |

|        |                            |         |
|--------|----------------------------|---------|
| 25_277 | ctg7180001636798_9909_SCT  | 4939309 |
| 25_278 | ctg7180001865629_5400_SGT  | 4949289 |
| 25_279 | ctg7180001865629_7700_SGT  | 4951589 |
| 25_280 | ctg7180001865629_11397_SAC | 4955286 |
| 25_281 | ctg7180001865629_11766_SAG | 4955655 |
| 25_282 | ctg7180001865629_18481_SAG | 4962370 |
| 25_283 | ctg7180001865629_18685_SCT | 4962574 |
| 25_284 | ctg7180001865629_18772_SAG | 4962661 |
| 25_285 | ctg7180001865629_28313_SAG | 4972202 |
| 25_286 | ctg7180001865629_36058_SGT | 4979947 |
| 25_287 | ctg7180001800511_2003_SCT  | 4982761 |
| 25_288 | ctg7180001800511_6383_SCT  | 4987141 |
| 25_289 | ctg7180001670914_3795_SAG  | 4991280 |
| 25_290 | ctg7180001895082_16635_SAG | 5011796 |
| 25_291 | ctg7180001895082_18235_SAG | 5013396 |
| 25_292 | ctg7180001895082_18688_SAG | 5013849 |
| 25_293 | ctg7180001904766_32348_SAC | 5025152 |
| 25_294 | ctg7180001904766_30100_SAG | 5027400 |
| 25_295 | ctg7180001904766_655_SAC   | 5056847 |
| 25_296 | ctg7180001651772_1057_SCT  | 5064594 |
| 25_297 | ctg7180001615140_3380_SAC  | 5069207 |
| 25_298 | ctg7180001307690_5822_SGT  | 5080396 |
| 25_299 | ctg7180001307690_1582_SAG  | 5080818 |
| 25_300 | ctg7180001307690_2470_SAG  | 5083748 |
| 25_301 | ctg7180001917075_5647_SAC  | 5097538 |
| 25_302 | ctg7180001917075_1750_SAG  | 5101435 |
| 25_303 | ctg7180001813548_3738_SCT  | 5109874 |
| 25_304 | ctg7180001813548_4633_SCT  | 5110769 |
| 25_305 | ctg7180001813548_4715_SCT  | 5110851 |
| 25_306 | ctg7180001813548_5334_SAG  | 5111470 |
| 25_307 | ctg7180001835918_5791_SGT  | 5123007 |
| 25_308 | ctg7180001835918_10870_SAC | 5128086 |
| 25_309 | ctg7180001815641_664_SCT   | 5170382 |
| 25_310 | ctg7180001815641_1553_SAC  | 5171271 |
| 25_311 | ctg7180001815641_1722      | 5171475 |

|        |                            |         |
|--------|----------------------------|---------|
| 25_312 | ctg7180001815641_2214_SCT  | 5171932 |
| 25_313 | ctg7180001815641_3086_SAG  | 5172804 |
| 25_314 | ctg7180001815641_4803_SAG  | 5174521 |
| 25_315 | ctg7180001803192_12815_SAC | 5202280 |
| 25_316 | ctg7180001803192_12996_SAC | 5202461 |
| 25_317 | ctg7180001360769_758_SGT   | 5209089 |
| 25_318 | ctg7180001285088_8333      | 5219484 |
| 25_319 | ctg7180001805892_1326_SAC  | 5288298 |
| 25_320 | ctg7180001594927_398_SGT   | 5292452 |
| 25_321 | ctg7180001594927_436_SAC   | 5292490 |
| 25_322 | ctg7180001594927_502_SCT   | 5292556 |
| 25_323 | ctg7180001594927_915_SAC   | 5292969 |
| 25_324 | ctg7180001893337_9135_SAG  | 5322780 |
| 25_325 | ctg7180001900444_1184_SGT  | 5335957 |
| 25_326 | ctg7180001831059_9237_SGT  | 5359063 |
| 25_327 | ctg7180001831059_8345_SAG  | 5359955 |
| 25_328 | ctg7180001814594_13956_SCT | 5385988 |
| 25_329 | ctg7180001368988_1799_SCT  | 5465152 |
| 25_330 | GCR_cBin31585_Ctg1_216     | 5470730 |
| 25_331 | ctg7180001650120_2144_SAG  | 5562143 |
| 25_332 | ctg7180001923663_9757_SAC  | 5605835 |
| 25_333 | ctg7180001798976_6581_SAG  | 5621039 |
| 25_334 | ctg7180001798976_8463_SCT  | 5622921 |
| 25_335 | ctg7180001908666_8331_SAC  | 5631683 |
| 25_336 | ctg7180001896329_1754_SAG  | 5660907 |
| 25_337 | ctg7180001927889_4720_SAG  | 5679139 |
| 25_338 | ctg7180001916723_3879_SGT  | 5693424 |
| 25_339 | ctg7180001856764_10656_SGT | 5713867 |
| 25_340 | ctg7180001856764_8886_SAG  | 5715637 |
| 25_341 | ctg7180001211218_2037_SGT  | 5730531 |
| 25_342 | ctg7180001211218_1799_SAG  | 5730769 |
| 25_343 | ctg7180001844522_443_SCT   | 5733202 |
| 25_344 | ctg7180001844522_4230_SAG  | 5736990 |
| 25_345 | ctg7180001580412_296_SCT   | 5758329 |
| 25_346 | ctg7180001297471_2066_SAG  | 5872148 |

|        |                            |         |
|--------|----------------------------|---------|
| 25_347 | ctg7180001288933_6554_SCT  | 5898240 |
| 25_348 | ctg7180001789427_928_SAC   | 5945085 |
| 25_349 | ctg7180001872131_6803_SAC  | 5961297 |
| 25_350 | ctg7180001897430_6700_SAG  | 5977118 |
| 25_351 | ctg7180001930313_4689_SAG  | 5991122 |
| 25_352 | ctg7180001911838_4189_SAG  | 6076594 |
| 25_353 | ctg7180001799086_4819_SGT  | 6093673 |
| 25_354 | ctg7180001887537_8166_SAC  | 6189140 |
| 25_355 | ctg7180001812156_2361_SCT  | 6215621 |
| 25_356 | ctg7180001925613_5157_SGT  | 6250923 |
| 25_357 | ctg7180001879684_5373_SAG  | 6282220 |
| 25_358 | ctg7180001879684_5090_SCT  | 6282503 |
| 25_359 | ctg7180001917261_10084_SAG | 6319685 |
| 25_360 | ctg7180001824312_729_SAG   | 6361775 |
| 25_361 | ctg7180001816366_1061_SAG  | 6482133 |
| 25_362 | ctg7180001539878_3877_SAC  | 6490173 |
| 25_363 | ctg7180001539878_2671_SAG  | 6491379 |
| 25_364 | ctg7180001539878_2342_SCT  | 6491708 |
| 25_365 | ctg7180001895574_2747_SAG  | 6517587 |
| 25_366 | ctg7180001895574_8794_SCT  | 6523599 |
| 25_367 | ctg7180001895574_12728_SCT | 6527533 |
| 25_368 | ctg7180001895574_12898_SAG | 6527703 |
| 25_369 | ctg7180001895574_24741_SAG | 6539546 |
| 25_370 | ctg7180001453857_5532_SAG  | 6565850 |
| 25_371 | ctg7180001453857_5252_SCT  | 6566130 |
| 25_372 | ctg7180001453857_4516_SCT  | 6566866 |
| 25_373 | ctg7180001814336_1520_SCT  | 6577827 |
| 25_374 | ctg7180001361811_2292_SGT  | 6643502 |
| 25_375 | ctg7180001361811_4429_SCT  | 6645639 |
| 25_376 | ctg7180001855361_294_SCT   | 6660842 |
| 25_377 | ctg7180001293420_2561_SGT  | 6665471 |
| 25_378 | ctg7180001293420_2836_SAC  | 6665746 |
| 25_379 | ctg7180001293420_3408_SCT  | 6666318 |
| 25_380 | ctg7180001293420_4344_SCT  | 6667254 |
| 25_381 | ctg7180001810041_7339_SCT  | 6673445 |



|        |                            |         |
|--------|----------------------------|---------|
| 25_382 | ctg7180001894108_650_SGT   | 6716677 |
| 25_383 | ctg7180001894108_1383_SGT  | 6717410 |
| 25_384 | ctg7180001894108_8191_SCT  | 6724218 |
| 25_385 | ctg7180001894108_12271_SAG | 6728298 |
| 25_386 | ctg7180001894108_16489_SAC | 6732516 |
| 25_387 | ctg7180001483697_1422_SCT  | 6738542 |
| 25_388 | ctg7180001812121_2475_SGT  | 6758497 |
| 25_389 | ctg7180001797954_2453_SGT  | 6802546 |
| 25_390 | ctg7180001840776_2128_SGT  | 6845116 |
| 25_391 | ctg7180001840776_3174_SCT  | 6846162 |
| 25_392 | ctg7180001909169_6561_SGT  | 6866045 |
| 25_393 | ctg7180001936846_386_SCT   | 6893813 |
| 25_394 | ctg7180001936848_1304_SCT  | 6972468 |
| 25_395 | ctg7180001889517_9401_SAC  | 7019278 |
| 25_396 | ctg7180001889517_1876_SCT  | 7026803 |
| 25_397 | ctg7180001889517_1270_SAC  | 7027409 |
| 25_398 | ctg7180001889517_1112_SAG  | 7027567 |
| 25_399 | ctg7180001889517_1007_SAG  | 7027672 |
| 25_400 | ctg7180001889517_748_SCT   | 7027931 |
| 25_401 | ctg7180001895941_5314_SAC  | 7048022 |
| 25_402 | ctg7180001895940_15003_SAG | 7058649 |
| 25_403 | ctg7180001895940_10255_SCT | 7063397 |
| 25_404 | ctg7180001895940_9243_SAG  | 7064409 |
| 25_405 | ctg7180001895940_8055_SAC  | 7065597 |
| 25_406 | ctg7180001895940_2665_SAG  | 7070987 |
| 25_407 | ctg7180001602886_1614_SCT  | 7074446 |
| 25_408 | ctg7180001929920_1022_SCT  | 7101120 |
| 25_409 | ctg7180001849805_15379_SGT | 7109056 |
| 25_410 | ctg7180001836950_7814_SAC  | 7140426 |
| 25_411 | ctg7180001694128_3601_SCT  | 7171067 |
| 25_412 | ctg7180001293867_1362_SAG  | 7175025 |
| 25_413 | ctg7180001293867_1308_SGT  | 7175079 |
| 25_414 | ctg7180001293867_1285_SCT  | 7175102 |
| 25_415 | ctg7180001293867_941_SGT   | 7175446 |
| 25_416 | ctg7180001293867_2418_SCT  | 7176323 |

|        |                           |         |
|--------|---------------------------|---------|
| 25_417 | ctg7180001246245_6209_SCT | 7177929 |
| 25_418 | ctg7180001246245_3803_SGT | 7180335 |
| 25_419 | ctg7180001246245_3698_SCT | 7180440 |
| 25_420 | ctg7180001246245_2533_SCT | 7181605 |
| 25_421 | ctg7180001932392_547_SAG  | 7185227 |
| 25_422 | ctg7180001809690_3042_SAG | 7208541 |
| 25_423 | ctg7180001809690_2910_SCT | 7208673 |
| 25_424 | ctg7180001933288_877_SCT  | 7267539 |
| 25_425 | ctg7180001933288_745_SGT  | 7267671 |
| 25_426 | ctg7180001933288_733_SAC  | 7267683 |
| 25_427 | ctg7180001933288_113_SGT  | 7268303 |
| 25_428 | ctg7180001320361_2012_SGT | 7271634 |
| 25_429 | ctg7180001320361_1965_SGT | 7271681 |
| 25_430 | ctg7180001320361_1738_SGT | 7271908 |
| 25_431 | ctg7180001320361_1352_SAC | 7272294 |
| 25_432 | ctg7180001320361_695_SCT  | 7272952 |
| 25_433 | ctg7180001544433_2254_SGT | 7290077 |
| 25_434 | ctg7180001544433_8198_SAG | 7296021 |
| 25_435 | ctg7180001659268_7868_SGT | 7307898 |
| 25_436 | ctg7180001659268_7579_SAC | 7308187 |
| 25_437 | ctg7180001349252_565_SGT  | 7316305 |
| 25_438 | ctg7180001349252_601_SAC  | 7316341 |
| 25_439 | ctg7180001729866_1480_SAC | 7320383 |
| 25_440 | ctg7180001674422_2743_SCT | 7350245 |
| 25_441 | ctg7180001674422_2194_SCT | 7350794 |
| 25_442 | ctg7180001674422_2172_SAG | 7350816 |
| 25_443 | ctg7180001937991_7984_SCT | 7361214 |
| 25_444 | ctg7180001937991_8629_SAC | 7361859 |
| 25_445 | ctg7180001937991_8680_SAC | 7361910 |
| 25_446 | ctg7180001577012_2059_SAG | 7402424 |
| 25_447 | ctg7180001577012_708_SCT  | 7403775 |
| 25_448 | ctg7180001628303_3218_SAG | 7405034 |
| 25_449 | ctg7180001628303_558_SGT  | 7407694 |
| 25_450 | ctg7180001628303_285_SAG  | 7407967 |
| 25_451 | ctg7180001787249_2581_SAG | 7411791 |

|        |                            |         |
|--------|----------------------------|---------|
| 25_452 | ctg7180001934787_13500_SCT | 7417339 |
| 25_453 | ctg7180001891578_237_SAG   | 7433981 |
| 25_454 | ctg7180001593785_2760_SGT  | 7455340 |
| 25_455 | ctg7180001593785_879_SCT   | 7457221 |
| 25_456 | ctg7180001821135_865_SCT   | 7469797 |
| 25_457 | ctg7180001821135_831_SCT   | 7469831 |
| 25_458 | ctg7180001216992_7013_SAG  | 7483722 |
| 25_459 | ctg7180001912994_6720_SGT  | 7497502 |
| 25_460 | ctg7180001912994_6771_SAG  | 7497553 |
| 25_461 | ctg7180001912994_8701_SAG  | 7499483 |
| 25_462 | ctg7180001913162_1601_SAG  | 7511985 |
| 25_463 | ctg7180001913162_3479_SCT  | 7513863 |
| 25_464 | ctg7180001913162_4022_SAC  | 7514406 |
| 25_465 | ctg7180001913162_22489_SCT | 7532873 |
| 25_466 | ctg7180001913162_23291_SCT | 7533675 |
| 25_467 | ctg7180001913162_24586_SAC | 7534970 |
| 25_468 | ctg7180001913162_25423_SAC | 7535807 |
| 25_469 | ctg7180001913162_25669_SGT | 7536053 |
| 25_470 | ctg7180001386140_1423_SAG  | 7542548 |
| 25_471 | ctg7180001386140_1351_SGT  | 7542620 |
| 25_472 | ctg7180001326282_564_SAG   | 7548718 |
| 25_473 | ctg7180001740542_2964_SAG  | 7552782 |
| 25_474 | ctg7180001869786_6967_SAC  | 7569303 |
| 25_475 | ctg7180001488958_1864_SAG  | 7582939 |
| 25_476 | ctg7180001488958_1623_SAG  | 7583180 |
| 25_477 | ctg7180001826187_4908_SAG  | 7586531 |
| 25_478 | ctg7180001826187_4705_SAG  | 7586734 |
| 25_479 | ctg7180001937488_2080_SCT  | 7593802 |
| 25_480 | ctg7180001937488_3573_SAG  | 7595295 |
| 25_481 | ctg7180001937488_5249_SCT  | 7596969 |
| 25_482 | ctg7180001344083_2247_SGT  | 7602408 |
| 25_483 | ctg7180001901783_6435_SAG  | 7621452 |
| 25_484 | ctg7180001901783_9787_SCT  | 7624804 |
| 25_485 | ctg7180001927162_2918_SAG  | 7642378 |
| 25_486 | ctg7180001927162_19214_SGT | 7658674 |

|        |                               |         |
|--------|-------------------------------|---------|
| 25_487 | ctg7180001927162_19402_SCT    | 7658862 |
| 25_488 | ctg7180001927162_19770_SAG    | 7659230 |
| 25_489 | ctg7180001927162_19842_SCT    | 7659302 |
| 25_490 | ctg7180001927162_21998_SAG    | 7661458 |
| 25_491 | ctg7180001927162_22495_SAC    | 7661955 |
| 25_492 | ctg7180001863418_13483_SAG    | 7666762 |
| 25_493 | ctg7180001863418_11497_SGT    | 7668748 |
| 25_494 | ctg7180001863418_8884_SGT     | 7671361 |
| 25_495 | ctg7180001863418_8359_SAC     | 7671886 |
| 25_496 | ctg7180001863418_8055_SAC     | 7672190 |
| 25_497 | ctg7180001863418_6896_SAG     | 7673349 |
| 25_498 | ctg7180001863418_5608_SAC     | 7674637 |
| 25_499 | ctg7180001863418_5417_SAC     | 7674828 |
| 25_500 | ctg7180001603500_622_SGT      | 7685070 |
| 25_501 | ctg7180001824997_4490_SGT     | 7699363 |
| 25_502 | ctg7180001824997_4409_SCT     | 7699444 |
| 25_503 | ctg7180001496552_3822_SGT     | 7707435 |
| 25_504 | ctg7180001496552_5011_SGT     | 7708589 |
| 25_505 | ctg7180001496552_5760_SAC     | 7709338 |
| 25_506 | ctg7180001496552_6223_SAC     | 7709801 |
| 25_507 | ctg7180001496552_8073_SCT     | 7711651 |
| 25_508 | ctg7180001496552_9613_SCT     | 7713191 |
| 25_509 | ctg7180001820735_20945_SAC    | 7732578 |
| 25_510 | ctg7180001820735_21665_SCT    | 7733298 |
| 25_511 | ctg7180001820735_22425_SAG    | 7734058 |
| 25_512 | ctg7180001820735_220237741514 |         |
| 25_513 | ctg7180001299329_1388_SAC     | 7746267 |
| 25_514 | ctg7180001913830_3355_SAG     | 7750631 |
| 25_515 | ctg7180001913830_7669_SAC     | 7754945 |
| 25_516 | ctg7180001913830_8964_SCT     | 7756240 |
| 25_517 | ctg7180001913831_3376_SAG     | 7773754 |
| 25_518 | ctg7180001913831_3602_SGT     | 7773980 |
| 25_519 | ctg7180001913831_14563_SCT    | 7784941 |
| 25_520 | ctg7180001913831_14817_SAG    | 7785195 |
| 25_521 | ctg7180001700884_935_SCT      | 7810280 |

|        |                            |         |
|--------|----------------------------|---------|
| 25_522 | ctg7180001250815_7768_SCT  | 7818992 |
| 25_523 | ctg7180001250815_9622_SAC  | 7820846 |
| 25_524 | ctg7180001250815_10098_SAC | 7821322 |
| 25_525 | ctg7180001361536_1783_SGT  | 7829383 |
| 25_526 | ctg7180001361536_954_SCT   | 7830212 |
| 25_527 | ctg7180001919017_7901_SAG  | 7841867 |
| 25_528 | ctg7180001907059_1921_SAG  | 7865280 |
| 25_529 | ctg7180001886887_5783_SAG  | 7874935 |
| 25_530 | ctg7180001477832_2889_SCT  | 7896965 |
| 25_531 | ctg7180001877202_14790_SCT | 7916087 |
| 25_532 | ctg7180001892444_19191_SGT | 7931082 |
| 25_533 | ctg7180001892444_19179_SGT | 7931094 |
| 25_534 | ctg7180001892444_23100_SAC | 7941649 |
| 25_535 | ctg7180001661310_889_SCT   | 7953342 |
| 25_536 | ctg7180001921885_1080_SGT  | 7972217 |
| 25_537 | ctg7180001921885_1218_SAC  | 7972355 |
| 25_538 | ctg7180001921885_7954_SGT  | 7979091 |
| 25_539 | ctg7180001894387_5106_SCT  | 8008948 |
| 25_540 | ctg7180001894387_3038_SCT  | 8011016 |
| 25_541 | ctg7180001860204_1286_SAC  | 8127389 |
| 25_542 | ctg7180001860204_2848_SAG  | 8128951 |
| 25_543 | ctg7180001860204_36975_SAG | 8163078 |
| 25_544 | ctg7180001910774_7911_SAC  | 8188942 |
| 25_545 | ctg7180001921815_7944_SAG  | 8208428 |
| 25_546 | ctg7180001921815_7576_SAC  | 8208796 |
| 25_547 | ctg7180001921815_7485_SCT  | 8208887 |
| 25_548 | ctg7180001842434_4085_SAG  | 8255400 |
| 25_549 | ctg7180001842434_2971_SAG  | 8256514 |
| 25_550 | ctg7180001650895_1184_SAG  | 8261424 |
| 25_551 | ctg7180001650895_2371_SAG  | 8262611 |
| 25_552 | ctg7180001840167_5964_SCT  | 8293861 |
| 25_553 | ctg7180001840167_6988_SAC  | 8294885 |
| 25_554 | ctg7180001928793_12045_SAG | 8327052 |
| 25_555 | ctg7180001928793_11338_SCT | 8327759 |
| 25_556 | ctg7180001928793_5786_SAC  | 8333311 |

|        |                            |         |
|--------|----------------------------|---------|
| 25_557 | ctg7180001221724_5798_SAG  | 8341790 |
| 25_558 | ctg7180001221724_5626_SAC  | 8341962 |
| 25_559 | ctg7180001909594_3776_SAG  | 8354999 |
| 25_560 | ctg7180001909594_12364_SAG | 8363586 |
| 25_561 | ctg7180001909594_12456_SCT | 8363678 |
| 25_562 | ctg7180001870044_17212_SAC | 8391348 |
| 25_563 | ctg7180001192072_1350_SAG  | 8427148 |
| 25_564 | ctg7180001793547_4987_SAC  | 8434269 |
| 25_565 | ctg7180001793547_6316_SAG  | 8435598 |
| 25_566 | ctg7180001793547_7243_SGT  | 8436525 |
| 25_567 | ctg7180001793547_7666_SAG  | 8436948 |
| 25_568 | ctg7180001609599_10858_SAG | 8438877 |
| 25_569 | ctg7180001609599_5560_SCT  | 8444175 |
| 25_570 | ctg7180001609599_5115_SAG  | 8444620 |
| 25_571 | ctg7180001866255_18658_SAC | 8451061 |
| 25_572 | ctg7180001866255_18348_SAC | 8451371 |
| 25_573 | ctg7180001656204_6126_SCT  | 8477178 |
| 25_574 | ctg7180001518674_190_SAG   | 8487789 |
| 25_575 | ctg7180001907494_3657_SAC  | 8498913 |
| 25_576 | ctg7180001907494_3591_SAG  | 8498979 |
| 25_577 | ctg7180001484292_550_SCT   | 8504828 |
| 25_578 | ctg7180001433617_4203_SAC  | 8539065 |
| 25_579 | ctg7180001688315_1601_SGT  | 8555644 |
| 25_580 | ctg7180001903203_7596_SAG  | 8609883 |
| 25_581 | ctg7180001717584_3729_SGT  | 8637786 |
| 25_582 | ctg7180001825551_9441_SAG  | 8656876 |
| 25_583 | ctg7180001935619_7806_SCT  | 8675070 |
| 25_584 | ctg7180001935619_753_SCT   | 8682123 |
| 25_585 | ctg7180001257370_3015_SAG  | 8685166 |
| 25_586 | ctg7180001257370_5194_SAG  | 8687345 |
| 25_587 | ctg7180001257370_5230_SGT  | 8687416 |
| 25_588 | ctg7180001257370_5997_SCT  | 8688148 |
| 25_589 | ctg7180001257370_6557_SAG  | 8688708 |
| 25_590 | ctg7180001351747_456_SCT   | 8703714 |
| 25_591 | ctg7180001351747_1243_SCT  | 8704501 |

|        |                            |         |
|--------|----------------------------|---------|
| 25_592 | ctg7180001351747_1260_SCT  | 8704518 |
| 25_593 | ctg7180001913751_13154_SGT | 8718866 |
| 25_594 | ctg7180001913751_7352_SAG  | 8724668 |
| 25_595 | ctg7180001913751_1750_SCT  | 8730264 |
| 25_596 | ctg7180001929917_2826_SGT  | 8736509 |
| 25_597 | ctg7180001194812_1085_SGT  | 8749814 |
| 25_598 | ctg7180001821918_1901_SCT  | 8773753 |
| 25_599 | ctg7180001821918_3801_SAG  | 8775654 |
| 25_600 | ctg7180001821918_3897_SAC  | 8775750 |
| 25_601 | ctg7180001270031_1201_SAG  | 8826856 |
| 25_602 | ctg7180001264182_1782_SAG  | 8838029 |
| 25_603 | ctg7180001598829_2153_SCT  | 8860581 |
| 25_604 | ctg7180001598829_1934_SCT  | 8860800 |
| 25_605 | ctg7180001818955_5026_SCT  | 8886821 |
| 25_606 | ctg7180001818955_4342_SAG  | 8887505 |
| 25_607 | ctg7180001875571_257_SGT   | 8914204 |
| 25_608 | ctg7180001875571_2428_SAC  | 8916375 |
| 25_609 | ctg7180001450487_158_SAG   | 8933838 |
| 25_610 | ctg7180001450487_348_SGT   | 8934028 |
| 25_611 | ctg7180001450487_2653_SAG  | 8936333 |
| 25_612 | ctg7180001450487_3232_SGT  | 8936912 |
| 25_613 | ctg7180001491644_6913_SGT  | 8949336 |
| 25_614 | ctg7180001491644_6839_SCT  | 8949410 |
| 25_615 | ctg7180001526568_10004_SGT | 8957808 |
| 25_616 | ctg7180001526568_2020_SCT  | 8965792 |
| 25_617 | ctg7180001886316_2524_SAG  | 8973956 |
| 25_618 | ctg7180001807747_18321_SCT | 8996017 |
| 25_619 | ctg7180001825439_9546_SAG  | 9086839 |
| 25_620 | ctg7180001737979_2208_SCT  | 9131638 |
| 25_621 | ctg7180001836545_4079_SAG  | 9155894 |
| 25_622 | ctg7180001795265_4858_SGT  | 9196407 |
| 25_623 | ctg7180001795265_5360_SAG  | 9196909 |
| 25_624 | ctg7180001213231_3056_SAC  | 9217501 |
| 25_625 | ctg7180001821765_10341_SGT | 9223405 |
| 25_626 | ctg7180001821765_3051_SCT  | 9225155 |

|        |                            |         |
|--------|----------------------------|---------|
| 25_627 | ctg7180001821765_4554_SCT  | 9229194 |
| 25_628 | ctg7180001821765_466_SCT   | 9233281 |
| 25_629 | ctg7180001857836_2572_SGT  | 9239996 |
| 25_630 | ctg7180001377987_1086_SAG  | 9254360 |
| 25_631 | ctg7180001377987_1167_SGT  | 9254441 |
| 25_632 | ctg7180001844787_3631_SCT  | 9263256 |
| 25_633 | ctg7180001844787_4024_SAC  | 9263649 |
| 25_634 | ctg7180001827334_2979_SAG  | 9281032 |
| 25_635 | ctg7180001827334_3745_SCT  | 9281798 |
| 25_636 | ctg7180001855009_4183_SGT  | 9297615 |
| 25_637 | ctg7180001498532_6208_SAG  | 9299010 |
| 25_638 | ctg7180001937900_29203_SAG | 9316563 |
| 25_639 | ctg7180001937900_29053_SCT | 9316713 |
| 25_640 | ctg7180001937900_28881_SAC | 9316885 |
| 25_641 | ctg7180001937900_28674_SCT | 9317092 |
| 25_642 | ctg7180001937900_28591_SGT | 9317175 |
| 25_643 | ctg7180001937900_28506_SAG | 9317260 |
| 25_644 | ctg7180001937900_28278_SCT | 9317488 |
| 25_645 | ctg7180001937900_26879_SAC | 9318887 |
| 25_646 | ctg7180001937900_22816_SAC | 9322950 |
| 25_647 | ctg7180001937900_18610_SAG | 9327156 |
| 25_648 | ctg7180001937900_16704_SAG | 9329062 |
| 25_649 | ctg7180001937900_16358_SAG | 9329408 |
| 25_650 | ctg7180001937900_22634_SGT | 9337221 |
| 25_651 | ctg7180001937900_7735_SGT  | 9338031 |
| 25_652 | ctg7180001937900_6841_SCT  | 9338925 |
| 25_653 | ctg7180001937900_6231_SCT  | 9339535 |
| 25_654 | ctg7180001872385_256_SCT   | 9349127 |
| 25_655 | ctg7180001913316_1787_SGT  | 9352804 |
| 25_656 | ctg7180001685787_2689_SAC  | 9386686 |
| 25_657 | ctg7180001816664_3453_SAG  | 9397789 |
| 25_658 | ctg7180001784796_4551_SAG  | 9407545 |
| 25_659 | ctg7180001784796_242_SAG   | 9411854 |
| 25_660 | ctg7180001510359_114_SAC   | 9420883 |
| 25_661 | ctg7180001867869_3525_SAC  | 9424113 |



|        |                            |         |
|--------|----------------------------|---------|
| 25_662 | ctg7180001867869_2742_SAC  | 9424896 |
| 25_663 | ctg7180001820576_4391_SAC  | 9432077 |
| 25_664 | ctg7180001700823_5642_SAC  | 9440061 |
| 25_665 | ctg7180001700823_3576_SAG  | 9442127 |
| 25_666 | ctg7180001700823_1995_SAC  | 9443708 |
| 25_667 | ctg7180001700823_387_SAG   | 9445316 |
| 25_668 | ctg7180001617142_1977_SAG  | 9474627 |
| 25_669 | ctg7180001802600_1178_SAG  | 9492888 |
| 25_670 | ctg7180001802600_1842_SAG  | 9493552 |
| 25_671 | ctg7180001802600_4370_SCT  | 9496080 |
| 25_672 | ctg7180001802600_4540_SAG  | 9496250 |
| 25_673 | ctg7180001802600_4995_SCT  | 9496705 |
| 25_674 | ctg7180001802600_5701_SAG  | 9497411 |
| 25_675 | ctg7180001802600_6644_SAG  | 9498354 |
| 25_676 | ctg7180001802600_7149_SAC  | 9498859 |
| 25_677 | ctg7180001802600_8160_SCT  | 9499870 |
| 25_678 | ctg7180001802600_8335_SAG  | 9500045 |
| 25_679 | ctg7180001802600_9728_SCT  | 9501438 |
| 25_680 | ctg7180001912390_364_SCT   | 9549739 |
| 25_681 | ctg7180001934986_3650_SCT  | 9570741 |
| 25_682 | ctg7180001934986_8817_SAG  | 9575908 |
| 25_683 | ctg7180001934986_8996_SAC  | 9576087 |
| 25_684 | ctg7180001934986_16127_SAC | 9583220 |
| 25_685 | ctg7180001934986_17345_SGT | 9584438 |
| 25_686 | ctg7180001287773_6302_SCT  | 9607428 |
| 25_687 | ctg7180001889079_7502_SAG  | 9615586 |
| 25_688 | ctg7180001615195_1234_SCT  | 9622992 |
| 25_689 | ctg7180001615195_2400_SCT  | 9624158 |
| 25_690 | ctg7180001615195_2755_SAC  | 9624513 |
| 25_691 | ctg7180001876823_7670_SCT  | 9627351 |
| 25_692 | ctg7180001906920_2196_SCT  | 9660352 |
| 25_693 | ctg7180001906920_445_SGT   | 9662103 |
| 25_694 | ctg7180001634671_5908_SCT  | 9693866 |
| 25_695 | ctg7180001634671_3948_SCT  | 9695826 |
| 25_696 | ctg7180001634671_3588_SAC  | 9696186 |

|        |                            |         |
|--------|----------------------------|---------|
| 25_697 | ctg7180001743685_1181_SAG  | 9709037 |
| 25_698 | ctg7180001937019_2731_SGT  | 9735252 |
| 25_699 | ctg7180001937019_11510_SAG | 9744031 |
| 25_700 | ctg7180001937019_12311_SAG | 9744832 |
| 25_701 | ctg7180001811247_9871_SAG  | 9758277 |
| 25_702 | ctg7180001811247_9182_SAC  | 9758966 |
| 25_703 | ctg7180001811247_9179_SCT  | 9758969 |
| 25_704 | ctg7180001811247_2636_SGT  | 9765512 |
| 25_705 | ctg7180001811247_2569_SAG  | 9765579 |
| 25_706 | ctg7180001792933_11730_SCT | 9771909 |
| 25_707 | ctg7180001792933_11545_SCT | 9772094 |
| 25_708 | ctg7180001792933_11308_SCT | 9772331 |
| 25_709 | ctg7180001792933_9779_SAC  | 9773860 |
| 25_710 | ctg7180001792933_9485_SAC  | 9774154 |
| 25_711 | ctg7180001792933_5878_SCT  | 9777761 |
| 25_712 | ctg7180001792933_4603_SAC  | 9779036 |
| 25_713 | ctg7180001792933_3890_SAC  | 9779749 |
| 25_714 | ctg7180001792933_2799_SGT  | 9780840 |
| 25_715 | ctg7180001792933_2562_SAG  | 9781077 |
| 25_716 | ctg7180001792933_1841_SCT  | 9781798 |
| 25_717 | ctg7180001792933_1276_SAC  | 9782363 |
| 25_718 | ctg7180001604360_498_SCT   | 9785791 |
| 25_719 | ctg7180001604360_902_SAC   | 9786195 |
| 25_720 | ctg7180001586346_548_SCT   | 9792698 |
| 25_721 | ctg7180001586346_2463_SCT  | 9794613 |
| 25_722 | ctg7180001821282_9166_SAG  | 9839804 |
| 25_723 | ctg7180001821282_7979_SCT  | 9840991 |
| 25_724 | ctg7180001821282_4012_SAG  | 9844958 |
| 25_725 | ctg7180001821282_2313_SCT  | 9846657 |
| 25_726 | ctg7180001292196_6499_SAG  | 9850016 |
| 25_727 | ctg7180001292196_2832_SAG  | 9853683 |
| 25_728 | ctg7180001292196_2445_SAG  | 9854070 |
| 25_729 | ctg7180001292196_2426_SCT  | 9854089 |
| 25_730 | ctg7180001292196_877_SCT   | 9855638 |
| 25_731 | ctg7180001887187_3393_SCT  | 9868854 |

|        |                            |          |
|--------|----------------------------|----------|
| 25_732 | ctg7180001800164_1298_SCT  | 9877192  |
| 25_733 | ctg7180001800164_1978_SAG  | 9877872  |
| 25_734 | ctg7180001800164_5903_SAC  | 9881797  |
| 25_735 | ctg7180001355199_160_SAC   | 9885587  |
| 25_736 | ctg7180001937020_1779_SGT  | 9887916  |
| 25_737 | ctg7180001937020_7703_SAC  | 9893840  |
| 25_738 | ctg7180001937020_12198_SAG | 9898335  |
| 25_739 | ctg7180001937020_17924_SAC | 9904061  |
| 25_740 | ctg7180001937020_19833_SCT | 9905970  |
| 25_741 | ctg7180001937020_26723_SCT | 9912860  |
| 25_742 | ctg7180001937020_26809_SAC | 9912946  |
| 25_743 | ctg7180001937020_27007_SAG | 9913144  |
| 25_744 | ctg7180001937020_27378_SAC | 9913515  |
| 25_745 | ctg7180001837057_945_SAC   | 9916675  |
| 25_746 | ctg7180001837057_1493_SAG  | 9917223  |
| 25_747 | ctg7180001837057_5900_SAG  | 9921630  |
| 25_748 | ctg7180001837057_7733_SAG  | 9923463  |
| 25_749 | ctg7180001837057_8823_SAC  | 9924553  |
| 25_750 | ctg7180001837057_9668_SAG  | 9925398  |
| 25_751 | ctg7180001866525_3161_SAC  | 9939895  |
| 25_752 | ctg7180001866525_3877_SAG  | 9940611  |
| 25_753 | ctg7180001866525_9903_SAG  | 9946637  |
| 25_754 | ctg7180001821901_894_SCT   | 9956012  |
| 25_755 | ctg7180001821900_11150_SCT | 9957610  |
| 25_756 | ctg7180001821900_10638_SAG | 9958122  |
| 25_757 | ctg7180001821900_7892_SGT  | 9960865  |
| 25_758 | ctg7180001821900_7866_SAG  | 9960891  |
| 25_759 | ctg7180001821900_6577_SAC  | 9962180  |
| 25_760 | ctg7180001821900_505_SAC   | 9968240  |
| 25_761 | ctg7180001821900_11199_SGT | 9968555  |
| 25_762 | ctg7180001840010_4779_SCT  | 9971071  |
| 25_763 | ctg7180001932831_18872_SCT | 9976732  |
| 25_764 | ctg7180001932831_1783_SAC  | 9993821  |
| 25_765 | ctg7180001794004_2261_SAC  | 10006500 |
| 25_766 | ctg7180001794004_1345_SAC  | 10007417 |

|        |                            |          |
|--------|----------------------------|----------|
| 25_767 | ctg7180001794004_780_SCT   | 10007982 |
| 25_768 | ctg7180001860462_12668_SGT | 10027014 |
| 25_769 | ctg7180001860462_11167_SAG | 10028515 |
| 25_770 | ctg7180001860462_9372_SAG  | 10030310 |
| 25_771 | ctg7180001860462_6435_SAG  | 10033247 |
| 25_772 | ctg7180001860462_5886_SAG  | 10033796 |
| 25_773 | ctg7180001860462_3111_SAC  | 10036571 |
| 25_774 | ctg7180001860462_1996_SGT  | 10037686 |
| 25_775 | ctg7180001860461_1158_SCT  | 10044618 |
| 25_776 | ctg7180001874853_18955_SCT | 10058946 |
| 25_777 | ctg7180001874853_11695_SGT | 10066206 |
| 25_778 | ctg7180001874853_11647_SAG | 10066254 |
| 25_779 | ctg7180001874853_10774_SAC | 10067127 |
| 25_780 | ctg7180001874853_3350_SAC  | 10074551 |
| 25_781 | ctg7180001874853_2320_SAG  | 10075581 |
| 25_782 | ctg7180001455688_3628_SGT  | 10081940 |
| 25_783 | ctg7180001455688_3048_SCT  | 10082520 |
| 25_784 | ctg7180001902362_11293_SCT | 10111095 |
| 25_785 | ctg7180001902362_11351_SAC | 10111153 |
| 25_786 | ctg7180001897317_2347_SAT  | 10130608 |
| 25_787 | ctg7180001897317_1350_SAG  | 10131605 |
| 25_788 | ctg7180001813259_1157_SCT  | 10143258 |
| 25_789 | ctg7180001813259_1090_SAG  | 10143325 |
| 25_790 | ctg7180001923649_686_SAG   | 10145054 |
| 25_791 | ctg7180001915130_5298_SCT  | 10153360 |
| 25_792 | ctg7180001702532_3927_SAC  | 10174185 |
| 25_793 | ctg7180001866298_3962_SCT  | 10181845 |
| 25_794 | ctg7180001866298_4685_SAG  | 10182568 |
| 25_795 | ctg7180001866298_5573_SAG  | 10183456 |
| 25_796 | ctg7180001866298_6337_SCT  | 10184220 |
| 25_797 | ctg7180001866298_7466_SAC  | 10185349 |
| 25_798 | ctg7180001535605_964_SCT   | 10188198 |
| 25_799 | ctg7180001433766_2158_SAG  | 10197534 |
| 25_800 | ctg7180001739449_5929_SAC  | 10205600 |
| 25_801 | ctg7180001739449_5752_SGT  | 10205777 |

|        |                            |          |
|--------|----------------------------|----------|
| 25_802 | ctg7180001898468_5055_SCT  | 10219619 |
| 25_803 | ctg7180001615113_915_SAC   | 10236219 |
| 25_804 | ctg7180001615113_1563_SAG  | 10236867 |
| 25_805 | ctg7180001908452_3414_SAC  | 10242717 |
| 25_806 | ctg7180001908452_5043_SAG  | 10244346 |
| 25_807 | ctg7180001908452_6585_SAC  | 10245888 |
| 25_808 | ctg7180001908452_6648_SAG  | 10245951 |
| 25_809 | ctg7180001910967_4383_SCT  | 10255962 |
| 25_810 | ctg7180001910967_10291_SAG | 10261870 |
| 25_811 | ctg7180001866979_2365_SGT  | 10266982 |
| 25_812 | ctg7180001866979_2789_SCT  | 10267406 |
| 25_813 | ctg7180001528025_7319_SGT  | 10299091 |
| 25_814 | ctg7180001528025_4657_SAG  | 10301753 |
| 25_815 | ctg7180001798567_1402_SAC  | 10312880 |
| 25_816 | ctg7180001688370_3516_SAG  | 10333955 |
| 25_817 | ctg7180001807907_1752_SAG  | 10356812 |
| 25_818 | ctg7180001914005_3268_SCT  | 10373667 |
| 25_819 | ctg7180001914005_3414_SAG  | 10373813 |
| 25_820 | ctg7180001914005_3580_SAG  | 10373979 |
| 25_821 | ctg7180001914005_5174_SGT  | 10375573 |
| 25_822 | ctg7180001914005_5438_SAG  | 10375837 |
| 25_823 | ctg7180001914005_5966_SCT  | 10376365 |
| 25_824 | ctg7180001914005_7977_SCT  | 10378376 |
| 25_825 | ctg7180001914005_8801_SAG  | 10379200 |
| 25_826 | ctg7180001914005_10136_SAC | 10380535 |
| 25_827 | ctg7180001914005_10225_SCT | 10380624 |
| 25_828 | ctg7180001914005_17004_SCT | 10387403 |
| 25_829 | ctg7180001914005_17704_SCT | 10388103 |
| 25_830 | ctg7180001914006_7411_SCT  | 10405069 |
| 25_831 | ctg7180001892775_534       | 10409495 |
| 25_832 | ctg7180001892775_1264_SAG  | 10419693 |
| 25_833 | ctg7180001892775_706_SAG   | 10420251 |
| 25_834 | ctg7180001795930_3295_SCT  | 10425800 |
| 25_835 | ctg7180001795930_3353_SAG  | 10425858 |
| 25_836 | ctg7180001795930_3487_SAC  | 10425992 |

|        |                            |          |
|--------|----------------------------|----------|
| 25_837 | ctg7180001795930_3586_SAG  | 10426091 |
| 25_838 | ctg7180001818408_21706_SCT | 10431401 |
| 25_839 | ctg7180001818408_15605_SCT | 10437502 |
| 25_840 | ctg7180001818408_15436_SGT | 10437671 |
| 25_841 | ctg7180001818408_12383_SAC | 10440724 |
| 25_842 | ctg7180001818408_11799_SCT | 10441308 |
| 25_843 | ctg7180001912741_842_SCT   | 10454406 |
| 25_844 | ctg7180001912741_1876_SGT  | 10455440 |
| 25_845 | ctg7180001912741_2282_SAG  | 10455846 |
| 25_846 | ctg7180001912741_4407_SGT  | 10457971 |
| 25_847 | ctg7180001912741_8845_SAC  | 10462409 |
| 25_848 | ctg7180001913733_16837_SGT | 10476237 |
| 25_849 | ctg7180001913733_3315_SGT  | 10489932 |
| 25_850 | ctg7180001913733_1443_SCT  | 10491804 |
| 25_851 | ctg7180001904937_1224_SGT  | 10494710 |
| 25_852 | ctg7180001216944_6008_SAC  | 10509066 |
| 25_853 | ctg7180001216944_5764_SCT  | 10509310 |
| 25_854 | ctg7180001917939_43_SAG    | 10522687 |
| 25_855 | ctg7180001907194_20821_SAG | 10527639 |
| 25_856 | ctg7180001904904_5154_SCT  | 10556341 |
| 25_857 | ctg7180001800243_909_SAG   | 10588344 |
| 25_858 | ctg7180001691730_929_SAC   | 10590426 |
| 25_859 | ctg7180001845734_14563_SAG | 10600683 |
| 25_860 | ctg7180001845734_13562_SCT | 10601684 |
| 25_861 | ctg7180001845734_13472_SGT | 10601774 |
| 25_862 | ctg7180001845734_6341_SCT  | 10608905 |
| 25_863 | ctg7180001845734_6290_SAC  | 10608956 |
| 25_864 | ctg7180001845734_1777_SCT  | 10613469 |
| 25_865 | ctg7180001845734_1337_SCT  | 10613909 |
| 25_866 | ctg7180001802151_14276_SGT | 10631268 |
| 25_867 | ctg7180001802151_1818_SAG  | 10643726 |
| 25_868 | ctg7180001802151_103_SAG   | 10645441 |
| 25_869 | ctg7180001792132_4131_SGT  | 10652141 |
| 25_870 | ctg7180001792132_3227_SCT  | 10653045 |
| 25_871 | ctg7180001792132_402_SAC   | 10655870 |

|        |                            |          |
|--------|----------------------------|----------|
| 25_872 | ctg7180001792132_238_SAG   | 10656034 |
| 25_873 | ctg7180001864750_1081_SAG  | 10657386 |
| 25_874 | ctg7180001864750_3622_SCT  | 10660711 |
| 25_875 | ctg7180001864750_5409_SGT  | 10662498 |
| 25_876 | ctg7180001937672_18577_SCT | 10667345 |
| 25_877 | ctg7180001864750_18471_SAC | 10675018 |
| 25_878 | ctg7180001864750_19389_SAC | 10675936 |
| 25_879 | ctg7180001864750_20177_SAG | 10676724 |
| 25_880 | ctg7180001864750_22413_SAC | 10678960 |
| 25_881 | ctg7180001789208_692_SCT   | 10686055 |
| 25_882 | ctg7180001789208_612_SAC   | 10686135 |
| 25_883 | ctg7180001204739_704_SAC   | 10731911 |
| 25_884 | ctg7180001204739_2728_SAG  | 10733935 |
| 25_885 | ctg7180001204739_6762_SAG  | 10738004 |
| 25_886 | ctg7180001917652_415_SAC   | 10740728 |
| 25_887 | ctg7180001917652_595_SCT   | 10740908 |
| 25_888 | ctg7180001917653_1307_SGT  | 10748381 |
| 25_889 | ctg7180001917653_1352_SCT  | 10748426 |
| 25_890 | ctg7180001917653_1624_SCT  | 10748698 |
| 25_891 | ctg7180001637188_1206_SAG  | 10754968 |
| 25_892 | ctg7180001637188_1534_SAC  | 10755296 |
| 25_893 | ctg7180001829949_2018_SAG  | 10765958 |
| 25_894 | ctg7180001281830_1837_SCT  | 10775777 |
| 25_895 | ctg7180001389609_797_SGT   | 10789616 |
| 25_896 | ctg7180001389609_2763_SAG  | 10791582 |
| 25_897 | ctg7180001389609_2961_SAG  | 10791780 |
| 25_898 | ctg7180001378642_3969_SAC  | 10802793 |
| 25_899 | ctg7180001378642_3952_SAG  | 10802810 |
| 25_900 | ctg7180001378642_3772_SCT  | 10802990 |
| 25_901 | ctg7180001378642_2758_SCT  | 10804004 |
| 25_902 | ctg7180001378642_2201_SAC  | 10804561 |
| 25_903 | ctg7180001822507_15142_SAC | 10827640 |
| 25_904 | ctg7180001527144_1466_SCT  | 10833349 |
| 25_905 | ctg7180001527144_1110_SCT  | 10833705 |
| 25_906 | ctg7180001628409_615_SAG   | 10844297 |

|        |                            |          |
|--------|----------------------------|----------|
| 25_907 | ctg7180001809298_5846_SAC  | 10860871 |
| 25_908 | ctg7180001809298_5898_SGT  | 10860923 |
| 25_909 | ctg7180001809298_5965_SCT  | 10860990 |
| 25_910 | ctg7180001809298_6042_SCT  | 10861067 |
| 25_911 | ctg7180001809298_6083_SCT  | 10861108 |
| 25_912 | ctg7180001809298_6371_SCG  | 10861396 |
| 25_913 | ctg7180001902250_9631_SGT  | 10868370 |
| 25_914 | ctg7180001902250_2676_SGT  | 10875325 |
| 25_915 | ctg7180001902249_11482_SGT | 10878492 |
| 25_916 | ctg7180001902249_10163_SAC | 10879811 |
| 25_917 | ctg7180001902249_9902_SGT  | 10880072 |
| 25_918 | ctg7180001902249_2698_SAG  | 10887276 |
| 25_919 | ctg7180001925111_3327_SGT  | 10927692 |
| 25_920 | ctg7180001925111_9262_SCT  | 10933627 |
| 25_921 | ctg7180001925111_9450_SCT  | 10933815 |
| 25_922 | ctg7180001925111_11755_SAG | 10936120 |
| 25_923 | ctg7180001925111_20262_SAG | 10944627 |
| 25_924 | ctg7180001800464_1192_SAG  | 10958112 |
| 25_925 | ctg7180001833281_1996_SAG  | 10973603 |
| 25_926 | ctg7180001815373_4087_SAG  | 10991855 |
| 25_927 | ctg7180001815373_4010_SCT  | 10991932 |
| 25_928 | ctg7180001907605_5971      | 11002106 |
| 25_929 | ctg7180001907605_9140_SGT  | 11005240 |
| 25_930 | ctg7180001824858_9422_SGT  | 11019604 |
| 25_931 | ctg7180001769198_866_SCT   | 11025362 |
| 25_932 | ctg7180001578930_6444_SGT  | 11053211 |
| 25_933 | ctg7180001897003_19142_SAC | 11065208 |
| 25_934 | ctg7180001897003_17932_SGT | 11066418 |
| 25_935 | ctg7180001897003_6472_SGT  | 11077878 |
| 25_936 | ctg7180001897003_1201_SCT  | 11083149 |
| 25_937 | ctg7180001833368_1334_SAG  | 11127365 |
| 25_938 | ctg7180001833368_2229_SGT  | 11128260 |
| 25_939 | ctg7180001809601_12717_SCT | 11135624 |
| 25_940 | ctg7180001809601_12583_SCT | 11135758 |
| 25_941 | ctg7180001809601_11983_SCT | 11136358 |



|        |                            |          |
|--------|----------------------------|----------|
| 25_942 | ctg7180001809601_11896_SCT | 11136445 |
| 25_943 | ctg7180001809601_10179_SAG | 11138162 |
| 25_944 | ctg7180001809601_3549_SCT  | 11144792 |
| 25_945 | ctg7180001843030_9192_SGT  | 11155353 |
| 25_946 | ctg7180001843030_7406_SCT  | 11157139 |
| 25_947 | ctg7180001843030_2289_SCT  | 11162256 |
| 25_948 | ctg7180001843030_2110_SAG  | 11162435 |
| 25_949 | ctg7180001843030_846_SGT   | 11163699 |
| 25_950 | ctg7180001915192_10451_SAG | 11173110 |
| 25_951 | ctg7180001915192_6815_SCT  | 11176746 |
| 25_952 | ctg7180001915192_4923_SGT  | 11178638 |
| 25_953 | ctg7180001915192_4430_SGT  | 11179131 |
| 25_954 | ctg7180001915192_4335_SAC  | 11179226 |
| 25_955 | ctg7180001915192_4270_SAG  | 11179291 |
| 25_956 | ctg7180001915192_4213_SAG  | 11179348 |
| 25_957 | ctg7180001915192_824_SCT   | 11182737 |
| 25_958 | ctg7180001846829_3696_SAG  | 11202688 |
| 25_959 | ctg7180001846829_2446_SAC  | 11203938 |
| 25_960 | ctg7180001846829_2420_SCT  | 11203964 |
| 25_961 | ctg7180001846829_2279_SAC  | 11204105 |
| 25_962 | ctg7180001358165_8306_SGT  | 11207365 |
| 25_963 | ctg7180001358165_6351_SAC  | 11209320 |
| 25_964 | ctg7180001358165_5229_SAG  | 11210442 |
| 25_965 | ctg7180001358165_242_SAC   | 11215429 |
| 25_966 | ctg7180001229997_1579_SGT  | 11217240 |
| 25_967 | ctg7180001229997_2158_SCT  | 11217819 |
| 25_968 | ctg7180001622829_1251_SAG  | 11220915 |
| 25_969 | ctg7180001933552_1480_SAC  | 11223099 |
| 25_970 | ctg7180001933552_16109_SCT | 11237728 |
| 25_971 | ctg7180001933552_16909_SCT | 11238528 |
| 25_972 | ctg7180001933552_17160_SAG | 11238779 |
| 25_973 | ctg7180001790927_4556_SCT  | 11250744 |
| 25_974 | ctg7180001823613_8935_SAC  | 11262322 |
| 25_975 | ctg7180001823613_8836_SGT  | 11262421 |
| 25_976 | ctg7180001823613_7890_SAG  | 11263367 |

|         |                            |          |
|---------|----------------------------|----------|
| 25_977  | ctg7180001823613_624_SAC   | 11270633 |
| 25_978  | ctg7180001222180_833_SAG   | 11277816 |
| 25_979  | ctg7180001319344_2127_SCT  | 11284783 |
| 25_980  | ctg7180001845876_1028_SAC  | 11287495 |
| 25_981  | ctg7180001845876_4619_SCT  | 11291086 |
| 25_982  | ctg7180001873205_296_SAG   | 11294225 |
| 25_983  | ctg7180001315087_2655_SCT  | 11299598 |
| 25_984  | ctg7180001869003_5556_SAG  | 11311304 |
| 25_985  | ctg7180001869003_3757_SAG  | 11313103 |
| 25_986  | ctg7180001869003_2926_SGT  | 11313934 |
| 25_987  | ctg7180001721520_1185_SAG  | 11319717 |
| 25_988  | ctg7180001927874_2570_SAG  | 11330730 |
| 25_989  | ctg7180001439515_21605_SAG | 11337892 |
| 25_990  | ctg7180001439515_20883_SAG | 11338614 |
| 25_991  | ctg7180001439515_12019_SAG | 11347478 |
| 25_992  | ctg7180001439515_4458_SAC  | 11354940 |
| 25_993  | ctg7180001439515_3842_SCT  | 11355556 |
| 25_994  | ctg7180001439515_1178_SCT  | 11358220 |
| 25_995  | ctg7180001439515_264_SAG   | 11359134 |
| 25_996  | ctg7180001439515_207_SGT   | 11359191 |
| 25_997  | ctg7180001591156_4982_SCT  | 11366111 |
| 25_998  | ctg7180001591156_6796_SCT  | 11367925 |
| 25_999  | ctg7180001191515_1543_SGT  | 11370078 |
| 25_1000 | ctg7180001807531_1701_SAG  | 11407939 |
| 25_1001 | ctg7180001807531_2982_SCT  | 11409220 |
| 25_1002 | ctg7180001807531_3163_SCT  | 11409401 |
| 25_1003 | ctg7180001807531_3429_SCT  | 11409667 |
| 25_1004 | ctg7180001807531_7470_SCT  | 11413708 |
| 25_1005 | ctg7180001807531_7479_SCT  | 11413717 |
| 25_1006 | ctg7180001807531_14635_SCT | 11420873 |
| 25_1007 | ctg7180001807531_14881_SAG | 11421119 |
| 25_1008 | ctg7180001807531_14975_SCT | 11421213 |
| 25_1009 | ctg7180001807532_3718_SCT  | 11431126 |
| 25_1010 | ctg7180001807532_3968_SAC  | 11431376 |
| 25_1011 | ctg7180001745454_467_SGT   | 11467542 |

|         |                            |          |
|---------|----------------------------|----------|
| 25_1012 | ctg7180001922204_15715_SCT | 11487588 |
| 25_1013 | ctg7180001926398_39_SAG    | 11510900 |
| 25_1014 | ctg7180001846909_461_SAG   | 11552949 |
| 25_1015 | ctg7180001788319_2362_SGT  | 11580519 |
| 25_1016 | ctg7180001901322_2945_SCT  | 11585609 |
| 25_1017 | ctg7180001901322_725_SCT   | 11587829 |
| 25_1018 | ctg7180001910716_7352_SAC  | 11592060 |
| 25_1019 | ctg7180001910716_5402_SAG  | 11594010 |
| 25_1020 | ctg7180001910715_16718_SGT | 11600549 |
| 25_1021 | ctg7180001910715_15306_SCT | 11601961 |
| 25_1022 | ctg7180001910715_5801_SCT  | 11611466 |
| 25_1023 | ctg7180001528210_924_SCT   | 11625113 |
| 25_1024 | ctg7180001865524_8446_SGT  | 11634722 |
| 25_1025 | ctg7180001897741_3987_SCT  | 11650564 |
| 25_1026 | ctg7180001897742_428_SAC   | 11652693 |
| 25_1027 | ctg7180001806488_2966_SGT  | 11679547 |
| 25_1028 | ctg7180001588397_301_SAG   | 11688559 |
| 25_1029 | ctg7180001865754_4091_SAC  | 11700518 |
| 25_1030 | ctg7180001865754_1967_SAC  | 11702642 |
| 25_1031 | ctg7180001547550_944_SAC   | 11718209 |
| 25_1032 | ctg7180001481239_1283_SCT  | 11740281 |
| 25_1033 | ctg7180001799661_21572_SAG | 11745146 |
| 25_1034 | ctg7180001799661_10947_SCT | 11755470 |
| 25_1035 | ctg7180001799661_10283_SAC | 11756134 |
| 25_1036 | ctg7180001799661_8810_SCT  | 11757607 |
| 25_1037 | ctg7180001799661_6489_SAG  | 11759928 |
| 25_1038 | ctg7180001799661_3937_SGT  | 11762480 |
| 25_1039 | ctg7180001799661_1105_SCT  | 11765312 |
| 25_1040 | ctg7180001440983_2817_SAG  | 11789726 |
| 25_1041 | ctg7180001485051_124_SCT   | 11793853 |
| 25_1042 | ctg7180001820563_559_SCT   | 11795334 |
| 25_1043 | ctg7180001820563_1682_SGT  | 11796458 |
| 25_1044 | ctg7180001820563_2264_SAC  | 11797040 |
| 25_1045 | ctg7180001820563_3008_SAC  | 11797784 |
| 25_1046 | ctg7180001820563_3610_SGT  | 11798387 |

|                                   |          |
|-----------------------------------|----------|
| 25_1047ctg7180001795447_8592_SCT  | 11810311 |
| 25_1048ctg7180001795447_6145_SAG  | 11812758 |
| 25_1049ctg7180001795447_4387_SAG  | 11814516 |
| 25_1050ctg7180001795447_365_SCT   | 11818538 |
| 25_1051ctg7180001820170_11272_SAG | 11819760 |
| 25_1052ctg7180001820170_9758_SCT  | 11821274 |
| 25_1053ctg7180001820170_9409_SAG  | 11821623 |
| 25_1054ctg7180001820170_2487_SAG  | 11828546 |
| 25_1055ctg7180001820170_1654_SGT  | 11829379 |
| 25_1056ctg7180001227682_1526_SAG  | 11831322 |
| 25_1057ctg7180001227682_378_SAC   | 11832470 |
| 25_1058ctg7180001871954_17323_SAG | 11834019 |
| 25_1059ctg7180001871954_6164_SCT  | 11845179 |
| 25_1060ctg7180001871954_5714_SAG  | 11845630 |
| 25_1061ctg7180001871954_3670_SAC  | 11847674 |
| 25_1062ctg7180001871954_1762_SGT  | 11849582 |
| 25_1063ctg7180001862185_8175_SCT  | 11853787 |
| 25_1064ctg7180001547439_2058_SAG  | 11876454 |
| 25_1065ctg7180001547439_1609_SCT  | 11876903 |
| 25_1066ctg7180001547439_1500_SGT  | 11877012 |
| 25_1067ctg7180001547439_1829_SCT  | 11877103 |
| 25_1068ctg7180001823978_10358_SCT | 11896730 |
| 25_1069ctg7180001929502_7605_SCT  | 11914750 |
| 25_1070ctg7180001328908_2960_SGT  | 11919967 |
| 25_1071ctg7180001328908_3933_SCT  | 11920940 |
| 25_1072ctg7180001328908_5052_SCT  | 11922059 |
| 25_1073ctg7180001214573_2288_SGT  | 11938399 |
| 25_1074ctg7180001214573_5272_SAG  | 11941383 |
| 25_1075ctg7180001214573_6155_SGT  | 11942266 |
| 25_1076ctg7180001214573_7109_SCT  | 11943220 |
| 25_1077ctg7180001794793_5075_SCT  | 11949140 |
| 25_1078ctg7180001794793_6425_SCT  | 11950490 |
| 25_1079ctg7180001794793_9511_SAG  | 11953576 |
| 25_1080ctg7180001794793_10610_SAG | 11954675 |
| 25_1081ctg7180001811672_1661_SAG  | 11964530 |

|         |                            |          |
|---------|----------------------------|----------|
| 25_1082 | ctg7180001855733_5784_SAC  | 11973630 |
| 25_1083 | ctg7180001935082_3692_SAG  | 11981802 |
| 25_1084 | ctg7180001935082_7981_SCT  | 11986054 |
| 25_1085 | ctg7180001935082_10080_SCT | 11988153 |
| 25_1086 | ctg7180001935082_15389_SAC | 11993462 |
| 25_1087 | ctg7180001286913_1026_SCT  | 12025503 |
| 25_1088 | ctg7180001897056_4029_SGT  | 12035033 |
| 25_1089 | ctg7180001897056_5810_SAG  | 12036814 |
| 25_1090 | ctg7180001897056_7687_SCT  | 12038691 |
| 25_1091 | ctg7180001257048_6191_SCT  | 12044962 |
| 25_1092 | ctg7180001257048_6082_SCT  | 12045071 |
| 25_1093 | ctg7180001257048_4154_SAC  | 12046999 |
| 25_1094 | ctg7180001843451_5478_SCT  | 12053519 |
| 25_1095 | ctg7180001444165_1203_SCT  | 12066386 |
| 25_1096 | ctg7180001444165_1480_SCT  | 12066663 |
| 25_1097 | ctg7180001769476_378_SAC   | 12077890 |
| 25_1098 | ctg7180001724871_2064_SCT  | 12080113 |
| 25_1099 | ctg7180001261775_817_SAG   | 12081023 |
| 25_1100 | ctg7180001845383_1884_SGT  | 12089681 |
| 25_1101 | ctg7180001869076_1835_SAC  | 12136851 |
| 25_1102 | ctg7180001869076_2370_SCT  | 12137386 |
| 25_1103 | ctg7180001919341_32513_SCT | 12152032 |
| 25_1104 | ctg7180001919341_31608_SAG | 12152937 |
| 25_1105 | ctg7180001919341_8456_SAC  | 12176090 |
| 25_1106 | ctg7180001919341_7107_SGT  | 12177439 |
| 25_1107 | ctg7180001463897_725_SGT   | 12231667 |
| 25_1108 | ctg7180001878177_7409_SCT  | 12239622 |
| 25_1109 | ctg7180001906643_5292_SAC  | 12248076 |
| 25_1110 | ctg7180001906643_13046_SAG | 12250395 |
| 25_1111 | ctg7180001906643_6123_SAG  | 12257355 |
| 25_1112 | ctg7180001635049_1619_SAG  | 12265770 |
| 25_1113 | ctg7180001298596_1178_SAG  | 12267948 |
| 25_1114 | ctg7180001759824_752_SCT   | 12269856 |
| 25_1115 | ctg7180001848910_15231_SAG | 12291216 |
| 25_1116 | ctg7180001848910_15111_SAG | 12291336 |

|                                   |          |
|-----------------------------------|----------|
| 25_1117ctg7180001810589_270_SCT   | 12316292 |
| 25_1118ctg7180001810589_160_SGT   | 12316402 |
| 25_1119ctg7180001796314_7416_SAC  | 12317138 |
| 25_1120ctg7180001796314_7302_SAG  | 12317252 |
| 25_1121ctg7180001796314_2991_SAG  | 12321563 |
| 25_1122ctg7180001796314_1511_SAG  | 12323043 |
| 25_1123ctg7180001796314_190_SCT   | 12324364 |
| 25_1124ctg7180001898022_8512_SGT  | 12356403 |
| 25_1125ctg7180001898022_3685_SCT  | 12361230 |
| 25_1126ctg7180001898022_2477_SCT  | 12362436 |
| 25_1127ctg7180001537452_1194_SAC  | 12368566 |
| 25_1128ctg7180001841174_18123_SAG | 12375940 |
| 25_1129ctg7180001841174_17265_SCT | 12376798 |
| 25_1130ctg7180001841174_10886_SAG | 12383177 |
| 25_1131ctg7180001841174_6954_SAG  | 12387109 |
| 25_1132ctg7180001841174_6212_SCT  | 12387851 |
| 25_1133ctg7180001841174_5170_SCT  | 12388893 |
| 25_1134ctg7180001841174_3092_SCT  | 12390971 |
| 25_1135ctg7180001841174_1737_SGT  | 12392326 |
| 25_1136ctg7180001186552_3036_SGT  | 12397948 |
| 25_1137ctg7180001186552_3522_SCT  | 12398434 |
| 25_1138GCR_cBin466_Ctg1_234       | 12401841 |
| 25_1139ctg7180001799478_3541_SCT  | 12411112 |
| 25_1140ctg7180001799478_4112_SAC  | 12411683 |
| 25_1141ctg7180001799478_6633_SAC  | 12414239 |
| 25_1142ctg7180001799478_7797_SAC  | 12415368 |
| 25_1143ctg7180001868148_1791_SGT  | 12439072 |
| 25_1144ctg7180001868148_1709_SGT  | 12439154 |
| 25_1145ctg7180001871711_3633_SAG  | 12449338 |
| 25_1146ctg7180001871711_2860_SCT  | 12450111 |
| 25_1147ctg7180001823124_4376_SGT  | 12460387 |
| 25_1148ctg7180001427879_1991_SAG  | 12466769 |
| 25_1149ctg7180001427879_3494_SAG  | 12468272 |
| 25_1150ctg7180001389052_493_SAG   | 12469011 |
| 25_1151ctg7180001389052_460_SAG   | 12469013 |

|         |                            |          |
|---------|----------------------------|----------|
| 25_1152 | ctg7180001867332_12274_SCT | 12487298 |
| 25_1153 | ctg7180001935286_1420_SAG  | 12491472 |
| 25_1154 | ctg7180001935286_2450_SAG  | 12492502 |
| 25_1155 | ctg7180001935286_5199_SCT  | 12495251 |
| 25_1156 | ctg7180001935286_5779_SAG  | 12495831 |
| 25_1157 | ctg7180001935286_13152_SAC | 12503204 |
| 25_1158 | ctg7180001935286_14962_SAC | 12505014 |
| 25_1159 | ctg7180001935286_19612_SAG | 12509663 |
| 25_1160 | ctg7180001935286_20656_SCT | 12510707 |
| 25_1161 | ctg7180001805887_2454_SGT  | 12534835 |
| 25_1162 | ctg7180001245633_2167_SAG  | 12538715 |
| 25_1163 | ctg7180001855710_4907_SCT  | 12550127 |
| 25_1164 | ctg7180001295818_3067_SCT  | 12558568 |
| 25_1165 | ctg7180001278497_484_SAG   | 12578782 |
| 25_1166 | ctg7180001278497_4791_SCT  | 12583089 |
| 25_1167 | ctg7180001743547_1030_SCT  | 12590642 |
| 25_1168 | ctg7180001901227_13900_SCT | 12594988 |
| 25_1169 | ctg7180001901227_12880_SCT | 12596008 |
| 25_1170 | ctg7180001901227_12067_SAG | 12596821 |
| 25_1171 | ctg7180001901227_11435_SCT | 12597453 |
| 25_1172 | ctg7180001901227_10234_SGT | 12598654 |
| 25_1173 | ctg7180001901227_9769_SCT  | 12599119 |
| 25_1174 | ctg7180001901227_9212_SAC  | 12599676 |
| 25_1175 | ctg7180001901227_8132_SAG  | 12600756 |
| 25_1176 | ctg7180001901227_6815_SCT  | 12602073 |
| 25_1177 | ctg7180001722864_7346_SAG  | 12620284 |
| 25_1178 | ctg7180001722864_11340_SCT | 12624278 |
| 25_1179 | ctg7180001689951_3662_SAG  | 12638521 |
| 25_1180 | ctg7180001689951_1558_SGT  | 12640625 |
| 25_1181 | ctg7180001859764_6227_SAC  | 12644305 |
| 25_1182 | ctg7180001868286_12431_SCT | 12691440 |
| 25_1183 | ctg7180001868286_11143_SCT | 12692724 |
| 25_1184 | ctg7180001868286_9995_SGT  | 12693872 |
| 25_1185 | ctg7180001868286_6840_SAC  | 12697027 |
| 25_1186 | ctg7180001868286_6785_SAC  | 12697082 |

|                                   |          |
|-----------------------------------|----------|
| 25_1187ctg7180001868286_5186_SCT  | 12698681 |
| 25_1188ctg7180001868286_4998_SAC  | 12698869 |
| 25_1189ctg7180001868286_2379_SCT  | 12701488 |
| 25_1190ctg7180001868286_2346_SGT  | 12701521 |
| 25_1191ctg7180001868286_1542_SCT  | 12702325 |
| 25_1192ctg7180001304401_6202_SAC  | 12713225 |
| 25_1193ctg7180001856795_13840_SAG | 12733191 |
| 25_1194ctg7180001934933_19690_SCT | 12754330 |
| 25_1195ctg7180001934933_25668_SCT | 12760308 |
| 25_1196GCR_cBin22511_Ctg1_246     | 12767399 |
| 25_1197ctg7180001840776_28488_SAC | 12794095 |
| 25_1198ctg7180001840776_7313      | 12799347 |
| 25_1199ctg7180001840776_13135_SAG | 12809447 |
| 25_1200ctg7180001840776_13049_SGT | 12809533 |
| 25_1201ctg7180001840776_12963_SAG | 12809619 |
| 25_1202ctg7180001898541_423_SCT   | 12819664 |
| 25_1203ctg7180001803858_13333_SAC | 12837802 |
| 25_1204ctg7180001803858_12519_SAG | 12838616 |
| 25_1205ctg7180001803858_7544_SAC  | 12843698 |
| 25_1206ctg7180001803858_6000_SGT  | 12845242 |
| 25_1207ctg7180001799730_5571_SAG  | 12859042 |
| 25_1208ctg7180001799730_1484_SCT  | 12863129 |
| 25_1209ctg7180001799730_1261_SAG  | 12863352 |
| 25_1210ctg7180001697830_16682_SGT | 12867724 |
| 25_1211ctg7180001697830_11182_SAG | 12873224 |
| 25_1212ctg7180001697830_10377_SCT | 12874029 |
| 25_1213ctg7180001697830_5681_SAG  | 12878725 |
| 25_1214ctg7180001697830_5062_SAC  | 12879344 |
| 25_1215ctg7180001697830_4935_SAC  | 12879471 |
| 25_1216ctg7180001697830_2048_SAG  | 12882358 |
| 25_1217ctg7180001582895_939_SCT   | 12918677 |
| 25_1218ctg7180001860240_12997_SCT | 12919875 |
| 25_1219ctg7180001860240_9887_SAG  | 12929553 |
| 25_1220ctg7180001903656_9829_SAC  | 12957487 |
| 25_1221ctg7180001903657_2442_SGT  | 12962156 |



|                                    |          |
|------------------------------------|----------|
| 25_1222 ctg7180001903657_5895_SAG  | 12965609 |
| 25_1223 ctg7180001903657_6304_SGT  | 12966018 |
| 25_1224 ctg7180001434805_1740_SAC  | 12974940 |
| 25_1225 ctg7180001434805_1895_SAC  | 12975095 |
| 25_1226 ctg7180001434805_2450_SAC  | 12975650 |
| 25_1227 ctg7180001496951_2109_SAG  | 12978009 |
| 25_1228 ctg7180001496951_1822_SCT  | 12978296 |
| 25_1229 ctg7180001496951_1347_SCT  | 12978771 |
| 25_1230 ctg7180001496951_1242_SGT  | 12978876 |
| 25_1231 ctg7180001804742_102_SAG   | 12983689 |
| 25_1232 ctg7180001753374_2035_SAG  | 13003407 |
| 25_1233 ctg7180001753374_1341_SAG  | 13004101 |
| 25_1234 ctg7180001211403_2738_SGT  | 13009931 |
| 25_1235 ctg7180001792191_4499_SGT  | 13020123 |
| 25_1236 ctg7180001792193_2027_SGT  | 13024326 |
| 25_1237 ctg7180001536638_2516_SAG  | 13036839 |
| 25_1238 ctg7180001826606_934_SAG   | 13045629 |
| 25_1239 ctg7180001826606_6958_SAG  | 13051653 |
| 25_1240 ctg7180001901329_10935_SCT | 13060767 |
| 25_1241 ctg7180001901329_6971_SCT  | 13064731 |
| 25_1242 ctg7180001901329_3668_SCT  | 13068034 |
| 25_1243 ctg7180001901329_10285_SGT | 13068051 |
| 25_1244 ctg7180001901329_1935_SGT  | 13069767 |
| 25_1245 ctg7180001901329_718_SGT   | 13070984 |
| 25_1246 ctg7180001896175_8313_SAG  | 13074609 |
| 25_1247 ctg7180001792505_789_SAG   | 13099204 |
| 25_1248 ctg7180001792505_2729_SGT  | 13101144 |
| 25_1249 ctg7180001792505_5143_SAG  | 13103558 |
| 25_1250 ctg7180001713094_1429_SAG  | 13106355 |
| 25_1251 ctg7180001806132_1760_SCT  | 13115740 |
| 25_1252 ctg7180001802522_1424_SCT  | 13128490 |
| 25_1253 ctg7180001619100_154_SCT   | 13130844 |
| 25_1254 ctg7180001542949_1393_SAG  | 13136893 |
| 25_1255 ctg7180001649349_864_SCT   | 13141891 |
| 25_1256 ctg7180001263016_12740_SAG | 13143517 |

|                                   |          |
|-----------------------------------|----------|
| 25_1257GCR_cBin2569_Ctg1_435      | 13143765 |
| 25_1258ctg7180001263016_10030_SGT | 13146227 |
| 25_1259ctg7180001263016_9871_SGT  | 13146386 |
| 25_1260ctg7180001263016_9845_SAG  | 13146412 |
| 25_1261ctg7180001263016_4678_SCT  | 13151579 |
| 25_1262ctg7180001263016_3931_SAG  | 13152326 |
| 25_1263ctg7180001858986_16957_SAC | 13186088 |
| 25_1264ctg7180001858986_19333_SAG | 13188464 |
| 25_1265ctg7180001858986_20425_SAG | 13189556 |
| 25_1266ctg7180001858986_20786_SGT | 13189917 |
| 25_1267ctg7180001446392_2935_SAG  | 13191013 |
| 25_1268ctg7180001446392_2784_SAG  | 13191164 |
| 25_1269ctg7180001446392_2456_SCT  | 13191492 |
| 25_1270ctg7180001888625_3156_SCT  | 13220017 |
| 25_1271ctg7180001589825_3146_SGT  | 13244480 |
| 25_1272ctg7180001265023_3622_SAG  | 13260097 |
| 25_1273ctg7180001232768_231_SAC   | 13305283 |
| 25_1274ctg7180001798739_9523_SAC  | 13309751 |
| 25_1275ctg7180001798739_7975_SAG  | 13311299 |
| 25_1276ctg7180001798739_3562_SGT  | 13315712 |
| 25_1277ctg7180001841187_5839_SGT  | 13362340 |
| 25_1278ctg7180001518741_4972_SAC  | 13398749 |
| 25_1279ctg7180001865598_2675_SCT  | 13417448 |
| 25_1280ctg7180001809046_3857_SCT  | 13433669 |
| 25_1281ctg7180001834645_3184_SAC  | 13442094 |
| 25_1282ctg7180001834645_3750_SCT  | 13442660 |
| 25_1283ctg7180001572527_6494_SGT  | 13444869 |
| 25_1284ctg7180001820751_8382_SAC  | 13457641 |
| 25_1285ctg7180001820751_7720_SCT  | 13458303 |
| 25_1286ctg7180001820751_7272_SGT  | 13458751 |
| 25_1287ctg7180001797138_226_SAC   | 13478492 |
| 25_1288ctg7180001261473_1020_SCT  | 13480656 |
| 25_1289ctg7180001261473_1441_SAG  | 13481077 |
| 25_1290ctg7180001860727_15859_SCT | 13507905 |
| 25_1291ctg7180001860727_31430_SCT | 13523476 |

|         |                            |          |
|---------|----------------------------|----------|
| 25_1292 | ctg7180001665834_5692_SCT  | 13528299 |
| 25_1293 | ctg7180001665834_4284_SCT  | 13529707 |
| 25_1294 | ctg7180001665834_4264_SGT  | 13529727 |
| 25_1295 | ctg7180001665834_3297_SAC  | 13530694 |
| 25_1296 | ctg7180001797947_9549_SAC  | 13538913 |
| 25_1297 | ctg7180001797947_9197_SGT  | 13539265 |
| 25_1298 | ctg7180001797947_7463_SAC  | 13540999 |
| 25_1299 | ctg7180001797947_5432_SAG  | 13543030 |
| 25_1300 | ctg7180001908211_685_SCT   | 13550321 |
| 25_1301 | ctg7180001908211_5190_SCT  | 13554826 |
| 25_1302 | ctg7180001833406_5576_SAG  | 13581541 |
| 25_1303 | ctg7180001794762_10902_SGT | 13585515 |
| 25_1304 | ctg7180001794762_6938_SAG  | 13589479 |
| 25_1305 | ctg7180001794762_6136_SCT  | 13590281 |
| 25_1306 | ctg7180001855493_66_SCT    | 13595257 |
| 25_1307 | ctg7180001649109_4288_SCT  | 13620593 |
| 25_1308 | ctg7180001811620_4944_SCT  | 13648945 |
| 25_1309 | ctg7180001201753_1153_SCT  | 13652289 |
| 25_1310 | ctg7180001254686_5509_SAC  | 13658726 |
| 25_1311 | ctg7180001872473_8796_SAC  | 13667530 |
| 25_1312 | ctg7180001872473_8763_SAG  | 13667563 |
| 25_1313 | ctg7180001872473_4211_SGT  | 13672115 |
| 25_1314 | ctg7180001872473_4012_SAG  | 13672314 |
| 25_1315 | ctg7180001887307_18011_SGT | 13678549 |
| 25_1316 | ctg7180001887307_10952_SAG | 13685608 |
| 25_1317 | ctg7180001924157_7978_SAG  | 13702525 |
| 25_1318 | ctg7180001924157_7538_SAG  | 13702965 |
| 25_1319 | ctg7180001924157_7342_SGT  | 13703161 |
| 25_1320 | ctg7180001805381_6456_SGT  | 13718295 |
| 25_1321 | ctg7180001805381_6092_SGT  | 13718659 |
| 25_1322 | ctg7180001877196_2068_SAG  | 13726588 |
| 25_1323 | ctg7180001805380_3722_SAC  | 13729298 |
| 25_1324 | ctg7180001805380_496_SAC   | 13732524 |
| 25_1325 | ctg7180001477774_310_SAG   | 13753837 |
| 25_1326 | ctg7180001809818_1896_SAC  | 13759922 |

|         |                            |          |
|---------|----------------------------|----------|
| 25_1327 | ctg7180001809818_1996_SAG  | 13760022 |
| 25_1328 | ctg7180001937397_11561_SCT | 13772693 |
| 25_1329 | ctg7180001937397_13409_SAC | 13774541 |
| 25_1330 | ctg7180001937397_15034_SAC | 13776166 |
| 25_1331 | ctg7180001937397_15761_SAC | 13776893 |
| 25_1332 | ctg7180001937397_16538_SGT | 13777670 |
| 25_1333 | ctg7180001937397_16630_SAG | 13777762 |
| 25_1334 | ctg7180001791023_1257      | 13780820 |
| 25_1335 | ctg7180001791023_11251_SCT | 13781119 |
| 25_1336 | ctg7180001791023_11230_SGT | 13781140 |
| 25_1337 | ctg7180001791023_10847_SAG | 13781523 |
| 25_1338 | ctg7180001791023_10732_SCT | 13781638 |
| 25_1339 | ctg7180001791023_10600_SAG | 13781770 |
| 25_1340 | ctg7180001791023_8936_SAT  | 13783434 |
| 25_1341 | ctg7180001791023_6123_SCT  | 13786247 |
| 25_1342 | ctg7180001431565_1578_SAC  | 13806121 |
| 25_1343 | ctg7180001431565_2129_SCT  | 13806672 |
| 25_1344 | ctg7180001431565_8895_SGT  | 13813438 |
| 25_1345 | ctg7180001443722_2913_SCT  | 13817852 |
| 25_1346 | ctg7180001443722_2906_SCT  | 13817859 |
| 25_1347 | ctg7180001443722_2837_SGT  | 13817928 |
| 25_1348 | ctg7180001443722_2013_SCT  | 13818752 |
| 25_1349 | ctg7180001443722_1269_SAG  | 13819496 |
| 25_1350 | ctg7180001932956_824_SAG   | 13822345 |
| 25_1351 | ctg7180001932956_3120_SCT  | 13824642 |
| 25_1352 | ctg7180001932956_5658_SAC  | 13827180 |
| 25_1353 | ctg7180001932956_7098_SAG  | 13828620 |
| 25_1354 | ctg7180001932956_9044_SAG  | 13830566 |
| 25_1355 | ctg7180001814724_10561_SAG | 13845430 |
| 25_1356 | ctg7180001814724_1273_SAC  | 13854718 |
| 25_1357 | ctg7180001877552_4408_SAC  | 13861171 |
| 25_1358 | ctg7180001877552_643_SCT   | 13864936 |
| 25_1359 | ctg7180001487314_525_SCT   | 13868457 |
| 25_1360 | ctg7180001825820_16168_SCT | 13871806 |
| 25_1361 | ctg7180001825820_15528_SAG | 13872446 |

|         |                            |          |
|---------|----------------------------|----------|
| 25_1362 | ctg7180001825820_15421_SCT | 13872553 |
| 25_1363 | ctg7180001825820_12090_SCT | 13875884 |
| 25_1364 | ctg7180001825820_9259_SCT  | 13878715 |
| 25_1365 | ctg7180001328260_445_SCT   | 13897633 |
| 25_1366 | ctg7180001795021_17049_SGT | 13905640 |
| 25_1367 | ctg7180001795021_7398_SGT  | 13915290 |
| 25_1368 | ctg7180001570302_1764_SAG  | 13925199 |
| 25_1369 | ctg7180001570302_750_SGT   | 13926213 |
| 25_1370 | ctg7180001806439_925_SAG   | 13931313 |
| 25_1371 | ctg7180001694933_5013_SAC  | 13966522 |
| 25_1372 | ctg7180001694933_6447_SCT  | 13967956 |
| 25_1373 | ctg7180001694933_7449_SCT  | 13968958 |
| 25_1374 | ctg7180001694933_8147_SCT  | 13969656 |
| 25_1375 | ctg7180001694933_10680_SAG | 13972189 |
| 25_1376 | ctg7180001694933_11014_SAG | 13972523 |
| 25_1377 | ctg7180001694933_12988_SCT | 13974497 |
| 25_1378 | ctg7180001694933_15820_SAG | 13977329 |
| 25_1379 | ctg7180001694933_19200_SAC | 13980709 |
| 25_1380 | ctg7180001694933_28626_SCT | 13990135 |
| 25_1381 | ctg7180001823145_1985_SGT  | 13996877 |
| 25_1382 | ctg7180001823145_7661_SAC  | 14002553 |
| 25_1383 | ctg7180001823145_9501_SAG  | 14004393 |
| 25_1384 | ctg7180001823145_12406_SCT | 14007298 |
| 25_1385 | ctg7180001792802_13916     | 14025089 |
| 25_1386 | ctg7180001714005_204_SGT   | 14027529 |
| 25_1387 | ctg7180001714005_266_SAC   | 14027591 |
| 25_1388 | ctg7180001714005_1458_SCT  | 14028783 |
| 25_1389 | ctg7180001298896_1472_SAC  | 14031696 |
| 25_1390 | ctg7180001529746_1216      | 14035047 |
| 25_1391 | ctg7180001529746_907_SGT   | 14035053 |
| 25_1392 | ctg7180001195351_673_SAG   | 14036683 |
| 25_1393 | ctg7180001195351_6392_SAG  | 14042402 |
| 25_1394 | ctg7180001195351_6594_SCT  | 14042604 |
| 25_1395 | ctg7180001930404_25919_SCT | 14050541 |
| 25_1396 | ctg7180001787827_17259_SAG | 14092408 |

|                                   |          |
|-----------------------------------|----------|
| 25_1397ctg7180001787827_16403_SCT | 14093264 |
| 25_1398ctg7180001787827_16077_SAG | 14093590 |
| 25_1399ctg7180001805565_3401_SAC  | 14111357 |
| 25_1400ctg7180001805565_1525_SAC  | 14113233 |
| 25_1401ctg7180001805565_942_SAG   | 14113816 |
| 25_1402ctg7180001242993_1050_SCT  | 14152051 |
| 25_1403ctg7180001242993_857_SCT   | 14152244 |
| 25_1404ctg7180001892895_3631_SCT  | 14158418 |
| 25_1405ctg7180001397418_1388_SAG  | 14167969 |
| 25_1406ctg7180001868335_1848_SAG  | 14171268 |
| 25_1407ctg7180001868335_2121_SCT  | 14171541 |
| 25_1408ctg7180001868335_2209_SAC  | 14171629 |
| 25_1409ctg7180001868335_9500_SCT  | 14178920 |
| 25_1410ctg7180001868335_9837_SCT  | 14179257 |
| 25_1411ctg7180001868335_10178_SAG | 14179598 |
| 25_1412ctg7180001868335_10524_SAG | 14179944 |
| 25_1413ctg7180001868335_11904_SAG | 14181324 |
| 25_1414ctg7180001826649_1478_SAC  | 14200664 |
| 25_1415ctg7180001826649_1418_SCT  | 14200724 |
| 25_1416ctg7180001917291_5198_SAG  | 14243739 |
| 25_1417ctg7180001917291_16032_SAG | 14254574 |
| 25_1418ctg7180001917291_18830_SAG | 14257372 |
| 25_1419ctg7180001807671_693_SAG   | 14258958 |
| 25_1420ctg7180001807671_1874_SAG  | 14260139 |
| 25_1421ctg7180001807671_7572_SGT  | 14265803 |
| 25_1422ctg7180001548826_3464_SCT  | 14267138 |
| 25_1423ctg7180001548826_3105_SCT  | 14267497 |
| 25_1424ctg7180001548826_1194_SAG  | 14269408 |
| 25_1425ctg7180001548826_693_SCT   | 14269909 |
| 25_1426ctg7180001880481_34787_SCT | 14278875 |
| 25_1427ctg7180001880481_34760_SAG | 14278902 |
| 25_1428ctg7180001880481_21958_SGT | 14291704 |
| 25_1429ctg7180001880481_18421_SAG | 14295241 |
| 25_1430ctg7180001880481_18244_SCT | 14295418 |
| 25_1431ctg7180001880481_18086_SCT | 14295576 |

|                                    |          |
|------------------------------------|----------|
| 25_1432 ctg7180001880481_7342_SGT  | 14306321 |
| 25_1433 ctg7180001880481_6393_SAC  | 14307270 |
| 25_1434 ctg7180001880481_6243_SAC  | 14307420 |
| 25_1435 ctg7180001880481_6232_SAC  | 14307431 |
| 25_1436 ctg7180001880481_3873_SCT  | 14309790 |
| 25_1437 ctg7180001880481_2786_SCT  | 14310877 |
| 25_1438 ctg7180001880481_2781_SCT  | 14310882 |
| 25_1439 ctg7180001819624_5971_SAG  | 14326274 |
| 25_1440 ctg7180001819624_5573_SCT  | 14326672 |
| 25_1441 ctg7180001819624_2152_SAG  | 14330093 |
| 25_1442 ctg7180001819624_1104_SCT  | 14331141 |
| 25_1443 ctg7180001195769_2601_SGT  | 14333803 |
| 25_1444 ctg7180001770212_2742_SCT  | 14341076 |
| 25_1445 ctg7180001776038_1765_SCT  | 14344406 |
| 25_1446 ctg7180001776038_1402_SGT  | 14344769 |
| 25_1447 ctg7180001855381_38132_SAC | 14353281 |
| 25_1448 ctg7180001855381_36232_SAG | 14355181 |
| 25_1449 ctg7180001855381_36139_SAC | 14355274 |
| 25_1450 ctg7180001855381_36096_SAG | 14355317 |
| 25_1451 ctg7180001855381_36093_SAC | 14355320 |
| 25_1452 ctg7180001855381_31537_SCT | 14359876 |
| 25_1453 ctg7180001855381_24129_SAG | 14367284 |
| 25_1454 ctg7180001855381_9276_SAG  | 14382137 |
| 25_1455 ctg7180001888903_8122_SCT  | 14394754 |
| 25_1456 ctg7180001888903_9118_SAC  | 14395750 |
| 25_1457 ctg7180001888903_17584_SCT | 14404216 |
| 25_1458 ctg7180001904716_6572_SAG  | 14411312 |
| 25_1459 ctg7180001904716_7446_SCT  | 14412186 |
| 25_1460 ctg7180001724900_440_SCT   | 14413221 |
| 25_1461 ctg7180001793293_1488_SAG  | 14428367 |
| 25_1462 ctg7180001793293_2579_SAG  | 14429458 |
| 25_1463 ctg7180001793293_3251_SAC  | 14430130 |
| 25_1464 ctg7180001793294_570_SAC   | 14438365 |
| 25_1465 ctg7180001793294_3286_SAG  | 14441081 |
| 25_1466 ctg7180001661712_3538_SAC  | 14445124 |

|                                   |          |
|-----------------------------------|----------|
| 25_1467ctg7180001661712_2861_SAC  | 14445801 |
| 25_1468ctg7180001661712_2694_SAG  | 14445968 |
| 25_1469ctg7180001818391_6178_SCT  | 14454949 |
| 25_1470ctg7180001818391_7222_SCT  | 14455993 |
| 25_1471ctg7180001818391_7757_SAG  | 14456528 |
| 25_1472ctg7180001818391_8634_SAG  | 14457405 |
| 25_1473ctg7180001818391_9652_SAG  | 14458423 |
| 25_1474ctg7180001818391_12059_SCT | 14460830 |
| 25_1475ctg7180001818391_14473_SCT | 14463244 |
| 25_1476ctg7180001818391_14896_SGT | 14463667 |
| 25_1477ctg7180001457626_5992_SAG  | 14467128 |
| 25_1478ctg7180001804964_1954_SAG  | 14501145 |
| 25_1479ctg7180001804964_1138_SCT  | 14501961 |
| 25_1480ctg7180001925474_4177_SCT  | 14511672 |
| 25_1481ctg7180001925474_17143_SAC | 14524638 |
| 25_1482ctg7180001925474_18880_SCT | 14526375 |
| 25_1483ctg7180001543793_1174_SGT  | 14552615 |
| 25_1484ctg7180001884124_4925_SGT  | 14560079 |
| 25_1485ctg7180001884124_5005_SCT  | 14560159 |
| 25_1486ctg7180001884124_5081_SCT  | 14560235 |
| 25_1487ctg7180001891857_605_SCT   | 14566987 |
| 25_1488ctg7180001891857_2108_SAG  | 14568490 |
| 25_1489ctg7180001891857_2265_SAC  | 14568647 |
| 25_1490ctg7180001891857_2595_SCT  | 14568977 |
| 25_1491ctg7180001891857_2949_SCT  | 14569331 |
| 25_1492ctg7180001891857_7310_SCT  | 14573692 |
| 25_1493ctg7180001891857_7776_SAG  | 14574158 |
| 25_1494ctg7180001719494_494_SAG   | 14596021 |
| 25_1495ctg7180001822187_1719_SCT  | 14600713 |
| 25_1496ctg7180001822187_908_SCT   | 14601524 |
| 25_1497ctg7180001822186_5583_SGT  | 14613111 |
| 25_1498ctg7180001822186_3638_SGT  | 14615056 |
| 25_1499ctg7180001822186_1791_SCT  | 14616904 |
| 25_1500ctg7180001822186_1065_SAG  | 14617630 |
| 25_1501ctg7180001822186_76_SAG    | 14618619 |



|         |                            |          |
|---------|----------------------------|----------|
| 25_1502 | ctg7180001818388_3386_SAG  | 14672457 |
| 25_1503 | ctg7180001818388_7363_SAG  | 14676435 |
| 25_1504 | ctg7180001818388_10162_SAG | 14679234 |
| 25_1505 | ctg7180001809312_983_SAC   | 14682965 |
| 25_1506 | ctg7180001809312_4536_SAG  | 14686518 |
| 25_1507 | ctg7180001809312_5461_SCT  | 14687443 |
| 25_1508 | ctg7180001809312_5966_SAG  | 14687948 |
| 25_1509 | ctg7180001661845_946_SGT   | 14695911 |
| 25_1510 | ctg7180001937649_6431_SAG  | 14698871 |
| 25_1511 | ctg7180001937649_3527_SGT  | 14701775 |
| 25_1512 | ctg7180001937648_13682_SGT | 14709600 |
| 25_1513 | ctg7180001937648_11348_SAC | 14711934 |
| 25_1514 | ctg7180001937648_7261_SCT  | 14716021 |
| 25_1515 | ctg7180001937648_4185_SCT  | 14719097 |
| 25_1516 | ctg7180001589914_881_SGT   | 14724588 |
| 25_1517 | ctg7180001589914_1767_SCT  | 14725474 |
| 25_1518 | ctg7180001589914_7155_SCT  | 14730862 |
| 25_1519 | ctg7180001589914_7369_SGT  | 14731076 |
| 25_1520 | ctg7180001589914_7612_SAG  | 14731319 |
| 25_1521 | ctg7180001589914_7943_SCT  | 14731650 |
| 25_1522 | ctg7180001589914_10900_SAG | 14734607 |
| 25_1523 | ctg7180001589914_19264_SAC | 14742971 |
| 25_1524 | ctg7180001589914_19366_SAG | 14743073 |
| 25_1525 | ctg7180001589914_19401_SAC | 14743108 |
| 25_1526 | ctg7180001589914_20429_SGT | 14744136 |
| 25_1527 | ctg7180001589914_21166_SAC | 14744873 |
| 25_1528 | ctg7180001587754_685_SCT   | 14748515 |
| 25_1529 | ctg7180001587754_2493_SGT  | 14750323 |
| 25_1530 | ctg7180001587754_6795_SCT  | 14753704 |
| 25_1531 | ctg7180001821668_12096_SCT | 14770007 |
| 25_1532 | ctg7180001799783_2319_SAG  | 14783234 |
| 25_1533 | ctg7180001343691_1183_SAG  | 14793778 |
| 25_1534 | ctg7180001860012_5933_SAC  | 14825489 |
| 25_1535 | ctg7180001860012_6850_SAG  | 14826406 |
| 25_1536 | ctg7180001860012_6885_SCT  | 14826441 |

|                                   |          |
|-----------------------------------|----------|
| 25_1537ctg7180001853008_1263_SCT  | 14848280 |
| 25_1538ctg7180001853008_1043_SAG  | 14848500 |
| 25_1539ctg7180001274718_8744_SAG  | 14851286 |
| 25_1540ctg7180001274718_8256_SGT  | 14851774 |
| 25_1541ctg7180001274718_6239_SAG  | 14853791 |
| 25_1542ctg7180001274718_5300_SGT  | 14854730 |
| 25_1543ctg7180001274718_3450_SCT  | 14856580 |
| 25_1544ctg7180001205881_1179_SGT  | 14863526 |
| 25_1545ctg7180001362795_4945_SAG  | 14870295 |
| 25_1546ctg7180001362795_4999_SCT  | 14870349 |
| 25_1547ctg7180001362795_5107_SAG  | 14870457 |
| 25_1548ctg7180001362795_5170_SAC  | 14870520 |
| 25_1549ctg7180001362795_6878_SGT  | 14872228 |
| 25_1550ctg7180001232337_4168_SAG  | 14882535 |
| 25_1551ctg7180001232337_5435_SAC  | 14883802 |
| 25_1552ctg7180001232337_5805_SAC  | 14884172 |
| 25_1553ctg7180001847184_402_SAG   | 14885420 |
| 25_1554ctg7180001847184_1369_SGT  | 14886387 |
| 25_1555ctg7180001847184_12417_SCT | 14897435 |
| 25_1556ctg7180001901926_5696_SAG  | 14903555 |
| 25_1557ctg7180001901926_2224_SAG  | 14907027 |
| 25_1558ctg7180001901926_975_SAG   | 14908276 |
| 25_1559ctg7180001487801_11759_SCT | 14922174 |
| 25_1560ctg7180001487801_13224_SAG | 14923639 |
| 25_1561ctg7180001487801_13602_SGT | 14924017 |
| 25_1562ctg7180001487801_13672_SAG | 14924087 |
| 25_1563ctg7180001487801_16428_SCT | 14926843 |
| 25_1564ctg7180001520904_3358_SAC  | 14945288 |
| 25_1565ctg7180001789174_5389_SAG  | 14954183 |
| 25_1566ctg7180001789174_3256_SAG  | 14956316 |
| 25_1567ctg7180001789173_3447_SCT  | 14960930 |
| 25_1568ctg7180001789173_3025_SAC  | 14961352 |
| 25_1569ctg7180001334937_243_SAG   | 14965307 |
| 25_1570ctg7180001817994_1705_SAG  | 14973347 |
| 25_1571ctg7180001817994_8836_SAG  | 14980478 |

|         |                           |          |
|---------|---------------------------|----------|
| 25_1572 | ctg7180001671425_4974_SGT | 14986242 |
| 25_1573 | ctg7180001671425_4657_SAG | 14986559 |
| 25_1574 | ctg7180001879591_6125_SGT | 14998258 |
| 25_1575 | ctg7180001307516_952_SAG  | 15021446 |
| 25_1576 | ctg7180001598663_760_SAG  | 15031998 |
| 25_1577 | ctg7180001598663_2533_SCT | 15033771 |
| 25_1578 | ctg7180001598663_4830_SCT | 15036068 |
| 25_1579 | ctg7180001598663_6250_SCT | 15037488 |
| 25_1580 | ctg7180001598663_7914_SAC | 15039152 |
| 25_1581 | ctg7180001598663_8638_SGT | 15039876 |
| 25_1582 | ctg7180001597210_82_SAC   | 15047174 |
| 25_1583 | ctg7180001498987_1929_SGT | 15048591 |
| 25_1584 | ctg7180001498987_1780_SCT | 15048740 |
| 25_1585 | ctg7180001498987_976_SAG  | 15049544 |
| 25_1586 | ctg7180001572635_5931_SAG | 15056436 |
| 25_1587 | ctg7180001572635_4973_SAG | 15057394 |
| 25_1588 | ctg7180001572635_1472_SAG | 15060895 |
| 25_1589 | ctg7180001572635_950_SAC  | 15061417 |
| 25_1590 | ctg7180001430603_3625_SAC | 15064352 |
| 25_1591 | ctg7180001808570_295_SAC  | 15073544 |
| 25_1592 | ctg7180001808570_4451_SGT | 15077700 |
| 25_1593 | ctg7180001808570_5691_SAG | 15078940 |
| 25_1594 | ctg7180001808570_8393_SCT | 15081642 |
| 25_1595 | ctg7180001793417_1928_SGT | 15097311 |
| 25_1596 | ctg7180001808529_2099_SCT | 15103520 |
| 25_1597 | ctg7180001710793_675_SGT  | 15117137 |
| 25_1598 | ctg7180001710793_248_SAG  | 15117564 |
| 25_1599 | ctg7180001457880_1068_SAG | 15122118 |
| 25_1600 | ctg7180001196945_3367_SAC | 15124377 |
| 25_1601 | ctg7180001196945_3108_SAC | 15124636 |
| 25_1602 | ctg7180001590711_923_SAG  | 15128762 |
| 25_1603 | ctg7180001590711_1252_SAG | 15129091 |
| 25_1604 | ctg7180001865752_2465_SAG | 15157688 |
| 25_1605 | ctg7180001865752_2079_SGT | 15158074 |
| 25_1606 | ctg7180001865752_1935_SAG | 15158218 |

|                                   |          |
|-----------------------------------|----------|
| 25_1607ctg7180001865752_1778_SGT  | 15158375 |
| 25_1608ctg7180001622509_2212_SAG  | 15162982 |
| 25_1609ctg7180001622509_2237_SCT  | 15163007 |
| 25_1610ctg7180001622509_3002_SAG  | 15163772 |
| 25_1611ctg7180001688202_2571_SCT  | 15174043 |
| 25_1612ctg7180001688202_4634_SCT  | 15176105 |
| 25_1613ctg7180001688202_7857_SGT  | 15179328 |
| 25_1614ctg7180001688202_8101_SCT  | 15179572 |
| 25_1615ctg7180001906631_1271_SAG  | 15188233 |
| 25_1616ctg7180001906631_4434_SAG  | 15191396 |
| 25_1617ctg7180001873402_338_SAC   | 15202189 |
| 25_1618ctg7180001814621_3606_SAG  | 15206189 |
| 25_1619ctg7180001814621_7767_SCT  | 15210350 |
| 25_1620ctg7180001814621_9502_SAG  | 15212085 |
| 25_1621ctg7180001814621_13016_SAC | 15215599 |
| 25_1622ctg7180001814621_14952     | 15217570 |
| 25_1623ctg7180001814621_16194_SGT | 15218777 |
| 25_1624ctg7180001814621_16210_SGT | 15218793 |
| 25_1625ctg7180001814621_22813_SAG | 15225396 |
| 25_1626ctg7180001814621_27754_SAG | 15230337 |
| 25_1627ctg7180001814621_31016_SAC | 15233599 |
| 25_1628ctg7180001533131_7897_SAG  | 15244904 |
| 25_1629ctg7180001533131_6069_SCT  | 15246732 |
| 25_1630ctg7180001533131_5985_SAG  | 15246816 |
| 25_1631ctg7180001533131_5977_SCT  | 15246824 |
| 25_1632ctg7180001533131_2056_SGT  | 15250745 |
| 25_1633ctg7180001876535_15250_SAG | 15272127 |
| 25_1634ctg7180001876535_15078_SAG | 15272299 |
| 25_1635ctg7180001652022_2655_SCT  | 15298940 |
| 25_1636ctg7180001556714_1294_SAG  | 15303206 |
| 25_1637ctg7180001738556_870_SAC   | 15319999 |
| 25_1638ctg7180001797261_649_SAG   | 15331006 |
| 25_1639ctg7180001797261_666_SGT   | 15331023 |
| 25_1640ctg7180001797261_2664_SAG  | 15333021 |
| 25_1641ctg7180001797261_7372_SCT  | 15337729 |

|         |                            |          |
|---------|----------------------------|----------|
| 25_1642 | ctg7180001797261_8498_SAC  | 15338855 |
| 25_1643 | ctg7180001922482_18052_SAC | 15362113 |
| 25_1644 | ctg7180001922482_16773_SCT | 15363392 |
| 25_1645 | ctg7180001922482_16678_SCT | 15363487 |
| 25_1646 | ctg7180001922482_13126_SAG | 15367039 |
| 25_1647 | ctg7180001922482_10790_SCT | 15369375 |
| 25_1648 | ctg7180001922482_9290_SCT  | 15370875 |
| 25_1649 | ctg7180001922482_9166_SCT  | 15370999 |
| 25_1650 | ctg7180001922482_9654_SAG  | 15371412 |
| 25_1651 | ctg7180001922482_4866_SAG  | 15375299 |
| 25_1652 | ctg7180001922482_4002_SCT  | 15376163 |
| 25_1653 | ctg7180001812366_8522_SCT  | 15381964 |
| 25_1654 | ctg7180001812366_7385_SAG  | 15383101 |
| 25_1655 | ctg7180001812366_7305_SAG  | 15383181 |
| 25_1656 | ctg7180001812366_7260_SCT  | 15383226 |
| 25_1657 | ctg7180001812366_200_SCT   | 15390286 |
| 25_1658 | ctg7180001919046_1730_SCT  | 15401177 |
| 25_1659 | ctg7180001795475_6430_SAC  | 15415031 |
| 25_1660 | ctg7180001563254_343_SCT   | 15428956 |
| 25_1661 | ctg7180001563254_7911_SAG  | 15436524 |
| 25_1662 | ctg7180001563254_11647_SCT | 15440260 |
| 25_1663 | ctg7180001757567_1786_SCT  | 15442875 |
| 25_1664 | ctg7180001829134_4603_SCT  | 15451349 |
| 25_1665 | ctg7180001192735_849_SGT   | 15453944 |
| 25_1666 | ctg7180001738880_1329_SGT  | 15462829 |
| 25_1667 | ctg7180001391836_1335_SCG  | 15467187 |
| 25_1668 | ctg7180001799786_4583_SAG  | 15496703 |
| 25_1669 | ctg7180001799786_3845_SGT  | 15497441 |
| 25_1670 | ctg7180001799786_3722_SAG  | 15497564 |
| 25_1671 | ctg7180001799786_3699_SAC  | 15497587 |
| 25_1672 | ctg7180001799786_3213_SCT  | 15498073 |
| 25_1673 | ctg7180001799786_17405     | 15500342 |
| 25_1674 | ctg7180001799786_809_SCT   | 15500477 |
| 25_1675 | ctg7180001328235_1864_SAC  | 15503381 |
| 25_1676 | ctg7180001328235_3846_SAG  | 15505363 |

|         |                            |          |
|---------|----------------------------|----------|
| 25_1677 | ctg7180001328235_4284_SAC  | 15505801 |
| 25_1678 | ctg7180001328235_5850_SAG  | 15507367 |
| 25_1679 | ctg7180001826395_3056_SAC  | 15514269 |
| 25_1680 | ctg7180001826395_4123_SGT  | 15515336 |
| 25_1681 | ctg7180001826395_7173_SGT  | 15518386 |
| 25_1682 | ctg7180001826395_11601_SGT | 15522814 |
| 25_1683 | ctg7180001826395_11607_SGT | 15522820 |
| 25_1684 | ctg7180001826395_11713_SGT | 15522926 |
| 25_1685 | ctg7180001806145_4524_SCT  | 15533645 |
| 25_1686 | ctg7180001830447_620_SGT   | 15557417 |
| 25_1687 | ctg7180001830447_710_SAC   | 15557507 |
| 25_1688 | ctg7180001830447_6338_SAG  | 15563135 |
| 25_1689 | ctg7180001830447_6872_SGT  | 15563669 |
| 25_1690 | ctg7180001919538_9182_SCT  | 15569435 |
| 25_1691 | ctg7180001927478_5141_SAG  | 15583451 |
| 25_1692 | ctg7180001803755_7036_SAC  | 15597285 |
| 25_1693 | ctg7180001803755_7670_SAG  | 15597919 |
| 25_1694 | ctg7180001803755_7743_SAC  | 15597992 |
| 25_1695 | ctg7180001803755_14929_SAG | 15605178 |
| 25_1696 | ctg7180001803755_15813_SAG | 15606062 |
| 25_1697 | ctg7180001825322_6343_SAG  | 15609124 |
| 25_1698 | ctg7180001825322_4198_SAC  | 15611269 |
| 25_1699 | ctg7180001825322_3520_SCT  | 15611947 |
| 25_1700 | ctg7180001868925_1089_SAC  | 15619285 |
| 25_1701 | ctg7180001868925_1624_SCT  | 15619820 |
| 25_1702 | ctg7180001868925_2607_SAG  | 15620803 |
| 25_1703 | ctg7180001868925_8339_SAG  | 15626535 |
| 25_1704 | ctg7180001868925_15857_SAG | 15634053 |
| 25_1705 | ctg7180001920131_17411_SAG | 15653217 |
| 25_1706 | ctg7180001920131_16408_SGT | 15654220 |
| 25_1707 | ctg7180001920131_15308_SCT | 15655320 |
| 25_1708 | ctg7180001815985_3095_SGT  | 15674875 |
| 25_1709 | ctg7180001398980_585_SAC   | 15689770 |
| 25_1710 | ctg7180001600413_1203_SAG  | 15691989 |
| 25_1711 | ctg7180001600413_1329_SAG  | 15692115 |

|                                   |          |
|-----------------------------------|----------|
| 25_1712ctg7180001600413_1873_SCT  | 15692659 |
| 25_1713ctg7180001600413_3262_SCT  | 15694048 |
| 25_1714ctg7180001818228_3010_SCT  | 15702517 |
| 25_1715ctg7180001818228_3999_SAG  | 15703506 |
| 25_1716ctg7180001214430_4513_SCT  | 15717163 |
| 25_1717ctg7180001214430_5882_SAG  | 15718532 |
| 25_1718ctg7180001447883_5177_SGT  | 15736838 |
| 25_1719ctg7180001770100_4545_SAG  | 15742465 |
| 25_1720ctg7180001770100_3598_SAG  | 15743412 |
| 25_1721ctg7180001770100_2744_SGT  | 15744266 |
| 25_1722ctg7180001770100_2140_SAG  | 15744870 |
| 25_1723ctg7180001770100_1868_SAC  | 15745142 |
| 25_1724ctg7180001834724_12975_SGT | 15770644 |
| 25_1725ctg7180001834724_15856_SCT | 15773525 |
| 25_1726ctg7180001834724_17070_SAG | 15774739 |
| 25_1727ctg7180001834724_18760_SAC | 15776429 |
| 25_1728ctg7180001834724_21124_SAC | 15778793 |
| 25_1729ctg7180001794168_11347_SAC | 15780276 |
| 25_1730ctg7180001430018_97_SCT    | 15795721 |
| 25_1731ctg7180001642699_1046_SCT  | 15798351 |
| 25_1732ctg7180001826612_11763_SCT | 15834203 |
| 25_1733ctg7180001826612_15584_SGT | 15838023 |
| 25_1734ctg7180001926701_2231_SAC  | 15848848 |
| 25_1735ctg7180001926701_10103_SAG | 15856720 |
| 25_1736ctg7180001926701_11188_SGT | 15857805 |
| 25_1737ctg7180001723136_1012_SCT  | 15861955 |
| 25_1738ctg7180001898633_8446_SAC  | 15906355 |
| 25_1739ctg7180001863436_918_SAC   | 15935482 |
| 25_1740ctg7180001843708_4774_SCT  | 15944155 |
| 25_1741ctg7180001843708_5023_SAC  | 15944404 |
| 25_1742ctg7180001794300_3545_SCT  | 15950514 |
| 25_1743ctg7180001794300_7085_SGT  | 15954054 |
| 25_1744ctg7180001794300_7328_SAC  | 15954297 |
| 25_1745ctg7180001794300_9247_SAG  | 15956216 |
| 25_1746ctg7180001898543_7625_SAG  | 15967815 |

|                                   |          |
|-----------------------------------|----------|
| 25_1747ctg7180001811536_5717_SAC  | 15991088 |
| 25_1748ctg7180001811536_12548_SAC | 15997919 |
| 25_1749ctg7180001811536_12555_SGT | 15997926 |
| 25_1750ctg7180001791100_1957_SCT  | 16035674 |
| 25_1751ctg7180001791102_3343_SCT  | 16043848 |
| 25_1752ctg7180001834705_1627_SAG  | 16053998 |
| 25_1753ctg7180001834705_3912_SCT  | 16056283 |
| 25_1754ctg7180001834705_17113_SGT | 16069480 |
| 25_1755ctg7180001812439_9267_SAG  | 16077958 |
| 25_1756ctg7180001812439_2845_SAG  | 16084380 |
| 25_1757ctg7180001812439_2423_SGT  | 16084802 |
| 25_1758ctg7180001335434_2391_SCT  | 16102208 |
| 25_1759ctg7180001335434_1848_SGT  | 16102751 |
| 25_1760ctg7180001822568_5831_SAG  | 16112001 |
| 25_1761ctg7180001822568_5116_SAG  | 16112716 |
| 25_1762ctg7180001822568_3811_SAG  | 16114021 |
| 25_1763ctg7180001866739_5135_SAG  | 16128396 |
| 25_1764ctg7180001903350_12865_SAG | 16147800 |
| 25_1765ctg7180001903350_13763_SAG | 16148698 |
| 25_1766ctg7180001903350_15439_SAG | 16150374 |
| 25_1767ctg7180001903350_20761_SAG | 16155696 |
| 25_1768ctg7180001903350_22272_SGT | 16157207 |
| 25_1769ctg7180001871908_3392_SCT  | 16166470 |
| 25_1770ctg7180001929281_13316_SAG | 16173997 |
| 25_1771ctg7180001929281_12999_SCT | 16174314 |
| 25_1772ctg7180001929281_10314_SCT | 16177357 |
| 25_1773ctg7180001929281_4912_SGT  | 16182759 |
| 25_1774ctg7180001285699_2960_SCT  | 16201868 |
| 25_1775ctg7180001210087_2798_SAG  | 16208664 |
| 25_1776ctg7180001889088_4525_SAG  | 16229971 |
| 25_1777ctg7180001889088_1711_SCT  | 16232785 |
| 25_1778ctg7180001889088_579_SCT   | 16233917 |
| 25_1779ctg7180001844987_6130_SAG  | 16258264 |
| 25_1780ctg7180001844987_2545_SCT  | 16259942 |
| 25_1781ctg7180001214664_4397_SGT  | 16263383 |



|         |                            |          |
|---------|----------------------------|----------|
| 25_1782 | ctg7180001214664_4197_SAG  | 16263583 |
| 25_1783 | ctg7180001214664_3975_SGT  | 16263805 |
| 25_1784 | ctg7180001214664_2288_SCT  | 16265492 |
| 25_1785 | ctg7180001905133_3534_SGT  | 16270882 |
| 25_1786 | ctg7180001919185_6061_SCT  | 16278062 |
| 25_1787 | ctg7180001919185_3138_SCT  | 16280985 |
| 25_1788 | ctg7180001919185_2083_SGT  | 16282040 |
| 25_1789 | ctg7180001846268_8805_SCT  | 16296558 |
| 25_1790 | ctg7180001458363_2382_SCT  | 16310929 |
| 25_1791 | ctg7180001458363_2514      | 16311061 |
| 25_1792 | ctg7180001458363_2696_SAG  | 16311208 |
| 25_1793 | ctg7180001458363_4400_SCT  | 16312912 |
| 25_1794 | ctg7180001458363_5570_SGT  | 16314082 |
| 25_1795 | ctg7180001458363_5643_SCT  | 16314155 |
| 25_1796 | ctg7180001299407_4361_SCT  | 16331118 |
| 25_1797 | GCR_cBin43301_Ctg1_366     | 16351501 |
| 25_1798 | ctg7180001537178_1594_SAG  | 16351901 |
| 25_1799 | ctg7180001736161_63_SGT    | 16355663 |
| 25_1800 | ctg7180001736161_683_SCT   | 16356283 |
| 25_1801 | ctg7180001868394_21533_SCT | 16378625 |
| 25_1802 | ctg7180001868394_28356_SCT | 16385448 |
| 25_1803 | ctg7180001813015_1739_SGT  | 16400159 |
| 25_1804 | ctg7180001390441_687_SAC   | 16406077 |
| 25_1805 | ctg7180001800255_493_SCT   | 16407321 |
| 25_1806 | ctg7180001800255_1211_SCT  | 16408039 |
| 25_1807 | ctg7180001599310_1864_SCT  | 16459210 |
| 25_1808 | ctg7180001261835_1111_SGT  | 16480484 |
| 25_1809 | ctg7180001920244_1046_SAC  | 16524673 |
| 25_1810 | ctg7180001437221_156_SGT   | 16534610 |
| 25_1811 | ctg7180001935720_6480_SCT  | 16547056 |
| 25_1812 | ctg7180001935720_5554_SAG  | 16547982 |
| 25_1813 | ctg7180001935720_3599_SCT  | 16549937 |
| 25_1814 | ctg7180001930619_8391_SAG  | 16562280 |
| 25_1815 | ctg7180001930619_13483_SGT | 16567372 |
| 25_1816 | ctg7180001794728_5140_SAG  | 16581563 |

|                                   |          |
|-----------------------------------|----------|
| 25_1817ctg7180001900180_3438_SCT  | 16608930 |
| 25_1818ctg7180001900180_6238_SAG  | 16611730 |
| 25_1819ctg7180001900180_6427_SAG  | 16611919 |
| 25_1820ctg7180001900180_7171_SAC  | 16612663 |
| 25_1821ctg7180001900180_14822_SCT | 16620314 |
| 25_1822ctg7180001887127_2742_SCT  | 16632121 |
| 25_1823ctg7180001921700_7929_SCT  | 16635840 |
| 25_1824ctg7180001921700_7381_SGT  | 16636387 |
| 25_1825ctg7180001861437_4875_SCT  | 16681818 |
| 25_1826ctg7180001861437_4703_SAG  | 16681990 |
| 25_1827ctg7180001861437_3954_SGT  | 16682739 |
| 25_1828ctg7180001928786_3992_SAC  | 16687976 |
| 25_1829ctg7180001928786_7090_SGT  | 16691074 |
| 25_1830ctg7180001928786_8856_SCT  | 16692839 |
| 25_1831ctg7180001791507_421_SCT   | 16695552 |
| 25_1832ctg7180001791507_1250_SAC  | 16696381 |
| 25_1833ctg7180001904696_9187_SCT  | 16721847 |
| 25_1834ctg7180001898513_2933_SGT  | 16747609 |
| 25_1835ctg7180001834091_8638_SAG  | 16754462 |
| 25_1836ctg7180001834091_4005      | 16754523 |
| 25_1837ctg7180001834091_8015_SGT  | 16755085 |
| 25_1838ctg7180001834091_6654_SAG  | 16756446 |
| 25_1839ctg7180001834091_4469_SCT  | 16758631 |
| 25_1840ctg7180001834091_2373_SAG  | 16760727 |
| 25_1841ctg7180001834091_2060_SGT  | 16761040 |
| 25_1842ctg7180001834091_1640_SCT  | 16761460 |
| 25_1843ctg7180001834091_1516_SAG  | 16761584 |
| 25_1844ctg7180001834091_834_SCT   | 16762266 |
| 25_1845ctg7180001834091_674_SAG   | 16762426 |
| 25_1846ctg7180001805253_7689_SCT  | 16829284 |
| 25_1847ctg7180001559773_7468_SAC  | 16845425 |
| 25_1848ctg7180001927291_9345_SCT  | 16859705 |
| 25_1849ctg7180001927291_7383_SCT  | 16861667 |
| 25_1850ctg7180001927291_6932_SCT  | 16862118 |
| 25_1851ctg7180001927291_6890_SGT  | 16862160 |

|         |                            |          |
|---------|----------------------------|----------|
| 25_1852 | ctg7180001927291_5196_SCT  | 16863854 |
| 25_1853 | ctg7180001550307_1623_SAC  | 16890308 |
| 25_1854 | ctg7180001550307_1706_SGT  | 16890391 |
| 25_1855 | ctg7180001913148_989_SAG   | 16895943 |
| 25_1856 | ctg7180001934635_9908_SAC  | 16903827 |
| 25_1857 | ctg7180001934635_1651_SAC  | 16912085 |
| 25_1858 | ctg7180001934635_12565_SAG | 16913080 |
| 25_1859 | ctg7180001933426_24142_SGT | 16941775 |
| 25_1860 | ctg7180001899908_352_SGT   | 16991301 |
| 25_1861 | ctg7180001899908_12305_SGT | 17003254 |
| 25_1862 | ctg7180001924415_5047_SAG  | 17030237 |
| 25_1863 | ctg7180001920498_1714_SAG  | 17055603 |
| 25_1864 | ctg7180001812919_5751_SAC  | 17109959 |
| 25_1865 | ctg7180001812919_5957_SGT  | 17110165 |
| 25_1866 | ctg7180001812919_6246_SCT  | 17110454 |
| 25_1867 | ctg7180001812919_8008_SAG  | 17112216 |
| 25_1868 | ctg7180001812919_10486_SCT | 17114694 |
| 25_1869 | ctg7180001902771_576_SCT   | 17120590 |
| 25_1870 | ctg7180001449907_2035_SAG  | 17142528 |
| 25_1871 | ctg7180001826822_4685_SAG  | 17152214 |
| 25_1872 | ctg7180001826822_2794_SCT  | 17154105 |
| 25_1873 | ctg7180001826822_269_SGT   | 17156630 |
| 25_1874 | ctg7180001834134_2659_SGT  | 17163046 |
| 25_1875 | ctg7180001843406_2778_SAG  | 17170579 |
| 25_1876 | ctg7180001843406_3274_SGT  | 17171075 |
| 25_1877 | ctg7180001843406_10720_SAC | 17178521 |
| 25_1878 | ctg7180001843406_11064_SCT | 17178865 |
| 25_1879 | ctg7180001487612_229_SCT   | 17203411 |
| 25_1880 | ctg7180001453538_136_SCT   | 17240780 |
| 25_1881 | ctg7180001874650_10872_SCT | 17255670 |
| 25_1882 | ctg7180001797803_12827_SAG | 17294665 |
| 25_1883 | ctg7180001797803_7951_SCT  | 17299541 |
| 25_1884 | ctg7180001797803_7285_SAG  | 17300207 |
| 25_1885 | ctg7180001797803_6035_SGT  | 17301457 |
| 25_1886 | ctg7180001797803_5806_SCT  | 17301686 |

|                                   |          |
|-----------------------------------|----------|
| 25_1887ctg7180001797803_4742_SCT  | 17302750 |
| 25_1888ctg7180001797803_4368_SAC  | 17303124 |
| 25_1889ctg7180001249557_1622_SAG  | 17309060 |
| 25_1890ctg7180001833679_5028_SAC  | 17343568 |
| 25_1891ctg7180001833679_5817_SAC  | 17344357 |
| 25_1892ctg7180001327339_373_SAG   | 17367729 |
| 25_1893ctg7180001841434_1242_SAG  | 17374918 |
| 25_1894ctg7180001834484_261_SAG   | 17414905 |
| 25_1895ctg7180001843196_8205_SGT  | 17431508 |
| 25_1896ctg7180001843196_8573_SGT  | 17431876 |
| 25_1897ctg7180001815639_4102_SGT  | 17438972 |
| 25_1898ctg7180001861759_2796_SGT  | 17449763 |
| 25_1899ctg7180001873645_6623_SGT  | 17500804 |
| 25_1900ctg7180001459100_515_SAG   | 17507965 |
| 25_1901ctg7180001459100_5295_SAG  | 17512745 |
| 25_1902ctg7180001459100_5421_SGT  | 17512871 |
| 25_1903ctg7180001459100_8405_SAG  | 17515855 |
| 25_1904ctg7180001459100_9501_SCT  | 17516951 |
| 25_1905ctg7180001911752_25613_SAG | 17542473 |
| 25_1906ctg7180001911752_21638_SAC | 17546448 |
| 25_1907ctg7180001911752_21581_SAG | 17546505 |
| 25_1908ctg7180001911752_20818_SAG | 17547268 |
| 25_1909ctg7180001911752_20660_SAG | 17547426 |
| 25_1910ctg7180001911752_20605_SGT | 17547481 |
| 25_1911ctg7180001911752_18316_SAC | 17549770 |
| 25_1912ctg7180001911752_16412_SCT | 17551674 |
| 25_1913ctg7180001911752_10773_SGT | 17557313 |
| 25_1914ctg7180001911752_7153_SAC  | 17560933 |
| 25_1915ctg7180001801965_5706_SAG  | 17571032 |
| 25_1916ctg7180001911751_10349_SAG | 17579929 |
| 25_1917ctg7180001911751_9706_SAC  | 17580572 |
| 25_1918ctg7180001911751_821_SGT   | 17589458 |
| 25_1919ctg7180001923001_272_SCT   | 17598127 |
| 25_1920ctg7180001923001_3349_SCT  | 17601204 |
| 25_1921ctg7180001844772_206_SCT   | 17620070 |

|         |                            |          |
|---------|----------------------------|----------|
| 25_1922 | ctg7180001844772_2004_SGT  | 17621868 |
| 25_1923 | ctg7180001844772_2447_SCT  | 17622311 |
| 25_1924 | ctg7180001844772_5101_SAC  | 17624965 |
| 25_1925 | ctg7180001696354_3684_SAC  | 17680425 |
| 25_1926 | ctg7180001896881_3121_SCT  | 17694239 |
| 25_1927 | ctg7180001896881_3950_SAG  | 17695068 |
| 25_1928 | ctg7180001896882_414_SCT   | 17698173 |
| 25_1929 | ctg7180001896882_652_SAC   | 17698411 |
| 25_1930 | ctg7180001896882_784_SAG   | 17698543 |
| 25_1931 | ctg7180001928113_5582_SCT  | 17709988 |
| 25_1932 | ctg7180001854051_17692_SCT | 17750854 |
| 25_1933 | ctg7180001562053_447_SAG   | 17779044 |
| 25_1934 | ctg7180001575198_1207_SCT  | 17921383 |
| 25_1935 | ctg7180001679061_5250_SAG  | 17935171 |
| 25_1936 | ctg7180001679061_6545      | 17936501 |
| 25_1937 | ctg7180001386207_363_SCT   | 17956058 |
| 25_1938 | ctg7180001790217_7606_SAG  | 17986866 |
| 25_1939 | ctg7180001545895_400_SAG   | 18003597 |
| 25_1940 | ctg7180001860645_15766_SAG | 18005673 |
| 25_1941 | ctg7180001860645_11635_SAG | 18009804 |
| 25_1942 | ctg7180001860645_7264_SCT  | 18014175 |
| 25_1943 | ctg7180001860645_2560_SGT  | 18018879 |
| 25_1944 | ctg7180001786538_227_SGT   | 18022091 |
| 25_1945 | ctg7180001291293_1451_SCT  | 18040545 |
| 25_1946 | ctg7180001291210_2440_SCT  | 18044250 |
| 25_1947 | ctg7180001860644_6574_SAG  | 18068005 |
| 25_1948 | ctg7180001860644_4134_SAG  | 18070445 |
| 25_1949 | ctg7180001699795_667_SAG   | 18090322 |
| 25_1950 | ctg7180001267682_926_SCT   | 18092405 |
| 25_1951 | ctg7180001233336_1710_SAG  | 18121993 |
| 25_1952 | ctg7180001445712_2858_SGT  | 18137002 |
| 25_1953 | ctg7180001817312_4025_SCT  | 18165375 |
| 25_1954 | ctg7180001881608_14447_SAG | 18180705 |
| 25_1955 | ctg7180001855879_12482_SAC | 18221306 |
| 25_1956 | ctg7180001804883_29408_SCT | 18279739 |

|                                   |          |
|-----------------------------------|----------|
| 25_1957ctg7180001804883_28048_SAG | 18281099 |
| 25_1958ctg7180001804883_24967_SAG | 18284180 |
| 25_1959ctg7180001919866_2081_SCT  | 18328924 |
| 25_1960ctg7180001810268_10484_SCT | 18338068 |
| 25_1961ctg7180001835136_1732_SGT  | 18355735 |
| 25_1962ctg7180001686912_62_SCT    | 18376537 |
| 25_1963ctg7180001913739_12546_SCT | 18398865 |
| 25_1964ctg7180001795413_2023_SAC  | 18412028 |
| 25_1965ctg7180001795413_1703_SAG  | 18412348 |
| 25_1966ctg7180001795113_9939_SCT  | 18426505 |
| 25_1967ctg7180001795113_10622_SAC | 18427188 |
| 25_1968ctg7180001825254_84_SAG    | 18433301 |
| 25_1969ctg7180001269492_4196_SCT  | 18440750 |
| 25_1970ctg7180001826145_12468_SCT | 18448052 |
| 25_1971ctg7180001826145_11067_SAG | 18449453 |
| 25_1972ctg7180001826145_9875_SCT  | 18450645 |
| 25_1973ctg7180001467630_5104_SGT  | 18473523 |
| 25_1974ctg7180001467630_3793_SAG  | 18474834 |
| 25_1975ctg7180001467630_2911_SAG  | 18475716 |
| 25_1976ctg7180001916943_1611_SCT  | 18482309 |
| 25_1977ctg7180001916943_7343_SAG  | 18488041 |
| 25_1978ctg7180001916943_11837_SAC | 18492535 |
| 25_1979ctg7180001916943_26986_SGT | 18507685 |
| 25_1980ctg7180001916943_26989_SAC | 18507688 |
| 25_1981ctg7180001916943_42676_SAC | 18523375 |
| 25_1982ctg7180001542568_2855_SAG  | 18538477 |
| 25_1983ctg7180001542568_2766_SCT  | 18538566 |
| 25_1984ctg7180001542568_2729_SAG  | 18538603 |
| 25_1985ctg7180001542568_994_SCT   | 18540338 |
| 25_1986ctg7180001502479_848_SCT   | 18542166 |
| 25_1987ctg7180001502479_979_SAC   | 18542297 |
| 25_1988ctg7180001916945_6708_SAG  | 18550234 |
| 25_1989ctg7180001916945_7019_SGT  | 18550545 |
| 25_1990ctg7180001935006_4011_SAC  | 18556637 |
| 25_1991ctg7180001935006_8103_SCT  | 18560729 |

|         |                            |          |
|---------|----------------------------|----------|
| 25_1992 | ctg7180001935006_8778_SCT  | 18561439 |
| 25_1993 | ctg7180001570425_3057_SCT  | 18570597 |
| 25_1994 | ctg7180001873544_18024_SGT | 18579287 |
| 25_1995 | ctg7180001443474_585_SCT   | 18598031 |
| 25_1996 | ctg7180001853206_4276_SCT  | 18621350 |
| 25_1997 | ctg7180001650116_9955_SGT  | 18643489 |
| 25_1998 | ctg7180001650116_10745_SAG | 18644279 |
| 25_1999 | ctg7180001650116_10947_SCT | 18644481 |
| 25_2000 | ctg7180001696022_2142_SGT  | 18647779 |
| 25_2001 | ctg7180001527715_245_SCT   | 18648978 |
| 25_2002 | ctg7180001887062_2412_SCT  | 18659127 |
| 25_2003 | ctg7180001736496_1077_SAG  | 18663166 |
| 25_2004 | ctg7180001793476_2789_SGT  | 18669474 |
| 25_2005 | ctg7180001793476_4445_SGT  | 18671130 |
| 25_2006 | ctg7180001793476_7787_SCT  | 18674472 |
| 25_2007 | ctg7180001793476_7873_SAG  | 18674558 |
| 25_2008 | ctg7180001793476_15829_SGT | 18682514 |
| 25_2009 | ctg7180001329038_2054_SCT  | 18689987 |
| 25_2010 | ctg7180001896806_12660_SAG | 18705287 |
| 25_2011 | ctg7180001896806_6134_SAG  | 18711814 |
| 25_2012 | ctg7180001859244_5798_SAG  | 18731481 |
| 25_2013 | ctg7180001859244_5123_SGT  | 18732156 |
| 25_2014 | ctg7180001859244_4648_SAG  | 18732631 |
| 25_2015 | ctg7180001859244_1512_SCT  | 18735767 |
| 25_2016 | ctg7180001859244_1304_SCT  | 18735975 |
| 25_2017 | ctg7180001859244_818_SCT   | 18736461 |
| 25_2018 | ctg7180001821756_11990_SAC | 18740045 |
| 25_2019 | ctg7180001821756_3500_SAG  | 18748535 |
| 25_2020 | ctg7180001856149_7836_SGT  | 18776104 |
| 25_2021 | ctg7180001329211_13415_SCT | 18785316 |
| 25_2022 | ctg7180001329211_13215_SGT | 18785516 |
| 25_2023 | ctg7180001299431_727_SCT   | 18799782 |
| 25_2024 | ctg7180001925308_8504_SCT  | 18809729 |
| 25_2025 | ctg7180001925308_8118_SCT  | 18810115 |
| 25_2026 | ctg7180001474484_8081_SAG  | 18849907 |

|         |                            |          |
|---------|----------------------------|----------|
| 25_2027 | ctg7180001911575_5068_SAC  | 18859322 |
| 25_2028 | ctg7180001911575_12387_SCG | 18866641 |
| 25_2029 | ctg7180001924893_812       | 18873068 |
| 25_2030 | ctg7180001924893_13695_SAG | 18885916 |
| 25_2031 | ctg7180001924893_14787_SCT | 18887008 |
| 25_2032 | ctg7180001924893_16608_SAC | 18888829 |
| 25_2033 | ctg7180001924893_16726_SCT | 18888947 |
| 25_2034 | ctg7180001924893_17248_SAG | 18889469 |
| 25_2035 | ctg7180001763522_6453_SGT  | 18894409 |
| 25_2036 | ctg7180001763522_6434_SAG  | 18894428 |
| 25_2037 | ctg7180001820029_5044_SAG  | 18905911 |
| 25_2038 | ctg7180001794635_25990_SCT | 18953300 |
| 25_2039 | ctg7180001918108_18585_SGT | 18954428 |
| 25_2040 | ctg7180001918108_17371_SAG | 18955642 |
| 25_2041 | ctg7180001918108_7626_SGT  | 18965387 |
| 25_2042 | ctg7180001918108_6501_SAG  | 18966512 |
| 25_2043 | ctg7180001918108_6023_SCT  | 18966990 |
| 25_2044 | ctg7180001918108_5995_SAG  | 18967018 |
| 25_2045 | ctg7180001811785_3571_SGT  | 18980939 |
| 25_2046 | ctg7180001811785_1794_SAG  | 18982717 |
| 25_2047 | ctg7180001341116_146_SAG   | 19038775 |
| 25_2048 | ctg7180001643209_2345_SAC  | 19064298 |
| 25_2049 | ctg7180001643209_1044_SAG  | 19065599 |
| 25_2050 | ctg7180001892824_12806_SCT | 19080508 |
| 25_2051 | ctg7180001892825_5074_SAC  | 19095732 |
| 25_2052 | ctg7180001892825_5938_SAG  | 19096596 |
| 25_2053 | ctg7180001745826_2484_SAG  | 19103623 |
| 25_2054 | ctg7180001745826_1371_SCT  | 19104736 |
| 25_2055 | ctg7180001897016_3216_SAC  | 19124642 |
| 25_2056 | ctg7180001483933_1847_SCT  | 19157380 |
| 25_2057 | ctg7180001483933_1364_SCT  | 19157863 |
| 25_2058 | ctg7180001795135_6344_SCT  | 19180960 |
| 25_2059 | ctg7180001795135_6471_SGT  | 19181087 |
| 25_2060 | ctg7180001828312_5421_SAG  | 19200331 |
| 25_2061 | ctg7180001828312_2418_SGT  | 19203334 |



|         |                            |          |
|---------|----------------------------|----------|
| 25_2062 | ctg7180001841556_3234_SAC  | 19213699 |
| 25_2063 | ctg7180001927563_2427_SCT  | 19235929 |
| 25_2064 | ctg7180001272989_846_SAG   | 19271329 |
| 25_2065 | ctg7180001936139_9480_SCT  | 19277417 |
| 25_2066 | ctg7180001936139_9161_SCT  | 19277736 |
| 25_2067 | ctg7180001936139_9111_SCT  | 19277786 |
| 25_2068 | ctg7180001936139_7778_SGT  | 19279119 |
| 25_2069 | ctg7180001238976_1332_SAG  | 19293470 |
| 25_2070 | ctg7180001871645_13966_SCT | 19299551 |
| 25_2071 | ctg7180001914645_4944_SGT  | 19346257 |
| 25_2072 | ctg7180001870515_184_SAG   | 19386479 |
| 25_2073 | ctg7180001870515_226_SAC   | 19386521 |
| 25_2074 | ctg7180001870516_1186_SGT  | 19395790 |
| 25_2075 | ctg7180001870516_1536_SAC  | 19396140 |
| 25_2076 | ctg7180001870516_9025_SGT  | 19403629 |
| 25_2077 | ctg7180001870516_9378_SCT  | 19403982 |
| 25_2078 | ctg7180001870516_9433_SCT  | 19404037 |
| 25_2079 | ctg7180001920558_8737_SGT  | 19430229 |
| 25_2080 | ctg7180001920558_11529_SAG | 19433021 |
| 25_2081 | ctg7180001920558_12129_SCT | 19433621 |
| 25_2082 | ctg7180001895355_7785_SAG  | 19444955 |
| 25_2083 | ctg7180001926317_9340_SAC  | 19485441 |
| 25_2084 | ctg7180001926317_5742_SCT  | 19489039 |
| 25_2085 | ctg7180001926317_4925_SAG  | 19489856 |
| 25_2086 | ctg7180001446702_1092_SCT  | 19500428 |
| 25_2087 | ctg7180001861234_23075_SAC | 19514848 |
| 25_2088 | ctg7180001861234_21372_SAG | 19516551 |
| 25_2089 | ctg7180001334706_70_SAC    | 19533884 |
| 25_2090 | ctg7180001334706_1288_SAG  | 19535102 |
| 25_2091 | ctg7180001452831_4153_SGT  | 19541114 |
| 25_2092 | ctg7180001452831_4798_SAC  | 19541759 |
| 25_2093 | ctg7180001918913_6971_SGT  | 19547925 |
| 25_2094 | ctg7180001807564_18555_SCT | 19560306 |
| 25_2095 | ctg7180001807564_11203     | 19560546 |
| 25_2096 | ctg7180001807564_17268_SAG | 19561593 |

|         |                            |          |
|---------|----------------------------|----------|
| 25_2097 | ctg7180001807564_10330_SCT | 19568531 |
| 25_2098 | ctg7180001807564_6811_SAC  | 19572050 |
| 25_2099 | ctg7180001805689_1927_SCT  | 19592877 |
| 25_2100 | ctg7180001934203_2234_SAG  | 19609921 |
| 25_2101 | ctg7180001934203_16892_SAG | 19624578 |
| 25_2102 | ctg7180001934203_19937_SCT | 19627623 |
| 25_2103 | ctg7180001672408_12938_SCT | 19634617 |
| 25_2104 | ctg7180001672408_12476_SAG | 19635079 |
| 25_2105 | ctg7180001672408_11769_SAC | 19635786 |
| 25_2106 | ctg7180001808628_3509_SCT  | 19660146 |
| 25_2107 | ctg7180001814682_5564_SCT  | 19678462 |
| 25_2108 | ctg7180001805390_2375_SGT  | 19698745 |
| 25_2109 | ctg7180001805390_1337_SGT  | 19699783 |
| 25_2110 | ctg7180001792711_2479_SGT  | 19710686 |
| 25_2111 | ctg7180001902348_10421_SCT | 19731692 |
| 25_2112 | ctg7180001256096_1475_SAG  | 19749155 |
| 25_2113 | ctg7180001819425_1491_SCT  | 19789427 |
| 25_2114 | ctg7180001895633_5771_SAG  | 19800654 |
| 25_2115 | ctg7180001895548_6186_SAG  | 19812921 |
| 25_2116 | ctg7180001270621_89_SAG    | 19817591 |
| 25_2117 | GCR_cBin23464_Ctg1_501     | 19825365 |
| 25_2118 | ctg7180001817452_296_SCT   | 19827046 |
| 25_2119 | ctg7180001817452_2267_SCT  | 19829017 |
| 25_2120 | ctg7180001817452_2402_SAG  | 19829152 |
| 25_2121 | ctg7180001906629_9532_SCT  | 19835783 |
| 25_2122 | ctg7180001906629_9002_SAG  | 19836313 |
| 25_2123 | ctg7180001906629_6933_SGT  | 19838382 |
| 25_2124 | ctg7180001906629_4470_SAG  | 19840845 |
| 25_2125 | ctg7180001697324_4845_SAC  | 19851450 |
| 25_2126 | ctg7180001269808_1435_SAG  | 19871444 |
| 25_2127 | ctg7180001632169_7157_SAG  | 19876223 |
| 25_2128 | ctg7180001632169_7117_SAC  | 19876263 |
| 25_2129 | ctg7180001632169_5810_SAG  | 19877570 |
| 25_2130 | ctg7180001632169_5376_SAC  | 19878004 |
| 25_2131 | ctg7180001830187_2431_SGT  | 19892575 |

|         |                            |          |
|---------|----------------------------|----------|
| 25_2132 | ctg7180001899964_4383_SGT  | 19899359 |
| 25_2133 | ctg7180001899964_3438_SCT  | 19900304 |
| 25_2134 | ctg7180001751215_1787_SGT  | 19911047 |
| 25_2135 | ctg7180001854609_2930_SCT  | 19920012 |
| 25_2136 | ctg7180001852674_3889_SCT  | 19933786 |
| 25_2137 | ctg7180001852674_2511_SAC  | 19935164 |
| 25_2138 | ctg7180001889072_1024_SCT  | 19942267 |
| 25_2139 | ctg7180001889072_3884_SCT  | 19944913 |
| 25_2140 | ctg7180001889072_975_SAG   | 19947822 |
| 25_2141 | ctg7180001889072_254_SAG   | 19948543 |
| 25_2142 | ctg7180001921212_8940_SCT  | 19976152 |
| 25_2143 | ctg7180001921212_3433_SAG  | 19977228 |
| 25_2144 | ctg7180001921212_3764_SCT  | 19981328 |
| 25_2145 | ctg7180001430807_3076_SGT  | 19998199 |
| 25_2146 | ctg7180001641258_4860_SAC  | 20030136 |
| 25_2147 | ctg7180001445681_128_SCT   | 20037330 |
| 25_2148 | ctg7180001578824_768_SAG   | 20046696 |
| 25_2149 | ctg7180001578824_1265_SCT  | 20047193 |
| 25_2150 | ctg7180001282094_235_SAC   | 20119489 |
| 25_2151 | ctg7180001814954_872_SAG   | 20147311 |
| 25_2152 | ctg7180001667091_473_SGT   | 20149916 |
| 25_2153 | ctg7180001283014_1533_SCT  | 20175017 |
| 25_2154 | ctg7180001563471_8209_SAG  | 20182830 |
| 25_2155 | ctg7180001563471_1876_SGT  | 20189163 |
| 25_2156 | ctg7180001563471_1209_SAC  | 20189830 |
| 25_2157 | ctg7180001191992_438_SCT   | 20200045 |
| 25_2158 | ctg7180001334321_1086_SCT  | 20209816 |
| 25_2159 | ctg7180001341246_84_SCT    | 20255254 |
| 25_2160 | ctg7180001921539_2504_SGT  | 20294210 |
| 25_2161 | ctg7180001916901_5669_SCT  | 20303042 |
| 25_2162 | ctg7180001916901_8098_SAC  | 20305471 |
| 25_2163 | ctg7180001553736_126_SAC   | 20313028 |
| 25_2164 | ctg7180001706031_390_SAC   | 20323777 |
| 25_2165 | ctg7180001852913_5793_SAG  | 20363498 |
| 25_2166 | ctg7180001915329_10017_SCT | 20369399 |

|         |                            |          |
|---------|----------------------------|----------|
| 25_2167 | ctg7180001190145_1126      | 20394886 |
| 25_2168 | ESTNV_35473_1871           | 20394976 |
| 25_2169 | ctg7180001269516_1278_SCT  | 20412739 |
| 25_2170 | ctg7180001269516_1413_SAG  | 20412874 |
| 25_2171 | ctg7180001269516_1481_SGT  | 20412942 |
| 25_2172 | ctg7180001269516_2424_SAC  | 20413885 |
| 25_2173 | ctg7180001269516_3425_SAG  | 20414886 |
| 25_2174 | ctg7180001269516_3441_SCT  | 20414902 |
| 25_2175 | ctg7180001856821_534_SGT   | 20427784 |
| 25_2176 | ctg7180001856821_11011_SAC | 20438259 |
| 25_2177 | ctg7180001856822_8641_SCT  | 20461104 |
| 25_2178 | ctg7180001525881_4571_SCT  | 20474204 |
| 25_2179 | ctg7180001525881_3789_SCT  | 20475184 |
| 25_2180 | ctg7180001525881_3062_SGT  | 20475910 |
| 25_2181 | ctg7180001892842_767_SAG   | 20485599 |
| 25_2182 | ctg7180001766282_1232_SAC  | 20534019 |
| 25_2183 | ctg7180001890000_1106_SAC  | 20542986 |
| 25_2184 | ctg7180001890000_1608_SAG  | 20543488 |
| 25_2185 | ctg7180001824305_1649_SAG  | 20600134 |
| 25_2186 | ctg7180001808021_1018_SAC  | 20622755 |
| 25_2187 | ctg7180001600740_1378_SAG  | 20629220 |
| 25_2188 | ctg7180001190772_4101_SGT  | 20658184 |
| 25_2189 | ctg7180001851296_1080_SCT  | 20663067 |
| 25_2190 | ctg7180001645977_2887_SGT  | 20695619 |
| 25_2191 | ctg7180001597614_2241_SAG  | 20726316 |
| 25_2192 | ctg7180001545719_1356_SCT  | 20726901 |
| 25_2193 | ctg7180001879907_4025_SAG  | 20748009 |
| 25_2194 | ctg7180001879907_1885_SGT  | 20750149 |
| 25_2195 | ctg7180001798602_1653_SAG  | 20777947 |
| 25_2196 | ctg7180001798602_5338_SCT  | 20781632 |
| 25_2197 | ctg7180001798602_5971_SAC  | 20782265 |
| 25_2198 | ctg7180001798602_6358_SAC  | 20782652 |
| 25_2199 | ctg7180001575028_52_SAG    | 20784952 |
| 25_2200 | ctg7180001575028_1788_SCT  | 20786688 |
| 25_2201 | ctg7180001381275_1470_SAG  | 20789226 |

|         |                            |          |
|---------|----------------------------|----------|
| 25_2202 | ctg7180001567797_17807_SAG | 20791979 |
| 25_2203 | ctg7180001567797_11937_SGT | 20797849 |
| 25_2204 | ctg7180001567797_9785_SAG  | 20800001 |
| 25_2205 | ctg7180001567797_9621_SCT  | 20800165 |
| 25_2206 | ctg7180001567797_7876_SAG  | 20801910 |
| 25_2207 | ctg7180001567797_7631_SCT  | 20802155 |
| 25_2208 | ctg7180001567797_7274_SAG  | 20802512 |
| 25_2209 | ctg7180001567797_7249_SAC  | 20802537 |
| 25_2210 | ctg7180001567797_7094_SGT  | 20802692 |
| 25_2211 | ctg7180001567797_5810_SAG  | 20803976 |
| 25_2212 | ctg7180001860429_588_SCT   | 20812324 |
| 25_2213 | ctg7180001860428_449_SAG   | 20821455 |
| 25_2214 | ctg7180001905032_8967_SAC  | 20837698 |
| 25_2215 | ctg7180001241672_1557_SAC  | 20893338 |
| 25_2216 | ctg7180001391618_638_SCT   | 20918751 |
| 25_2217 | ctg7180001391618_723_SGT   | 20918836 |
| 25_2218 | ctg7180001848498_1006_SCT  | 20937698 |
| 25_2219 | ctg7180001848498_1023_SAC  | 20937715 |
| 25_2220 | ctg7180001773830_6506_SCT  | 20941077 |
| 25_2221 | ctg7180001639293_3549_SGT  | 20956148 |
| 25_2222 | ctg7180001639293_3738_SAG  | 20956373 |
| 25_2223 | ctg7180001639293_3949_SAG  | 20956548 |
| 25_2224 | ctg7180001834654_7618_SAC  | 20973179 |
| 25_2225 | ctg7180001834654_10912_SCT | 20976473 |
| 25_2226 | ctg7180001834654_16963_SGT | 20982524 |
| 25_2227 | ctg7180001834654_17220     | 20982816 |
| 25_2228 | ctg7180001834654_17371_SAC | 20982932 |
| 25_2229 | ctg7180001790422_1167_SAC  | 20985980 |
| 25_2230 | ctg7180001790422_2220_SCT  | 20987033 |
| 25_2231 | ctg7180001790422_3234_SAG  | 20988047 |
| 25_2232 | ctg7180001935563_5696_SCT  | 21015192 |
| 25_2233 | ctg7180001789680_68_SCT    | 21031218 |
| 25_2234 | ctg7180001789678_3963_SAG  | 21035080 |
| 25_2235 | ctg7180001789678_2060_SCT  | 21036983 |
| 25_2236 | ctg7180001789678_1909_SGT  | 21037134 |

|         |                            |          |
|---------|----------------------------|----------|
| 25_2237 | ctg7180001901658_1775_SGT  | 21041004 |
| 25_2238 | ctg7180001224859_832_SAG   | 21045745 |
| 25_2239 | ctg7180001889172_449_SGT   | 21046257 |
| 25_2240 | ctg7180001889172_4546_SCT  | 21050354 |
| 25_2241 | ctg7180001889172_9196_SAG  | 21055004 |
| 25_2242 | ctg7180001889172_9692_SAC  | 21055500 |
| 25_2243 | ctg7180001889172_11079_SGT | 21056887 |
| 25_2244 | ctg7180001889172_13364_SGT | 21059172 |
| 25_2245 | ctg7180001833295_17660_SCT | 21090433 |
| 25_2246 | ctg7180001833295_1674_SAG  | 21106419 |
| 25_2247 | ctg7180001823577_1444_SAG  | 21112556 |
| 25_2248 | ctg7180001823577_2084_SAG  | 21113196 |
| 25_2249 | ctg7180001823577_2153_SAG  | 21113265 |
| 25_2250 | ctg7180001823577_2203_SGT  | 21113315 |
| 25_2251 | ctg7180001823577_12194_SAC | 21123306 |
| 25_2252 | ctg7180001823577_14857_SCT | 21125969 |
| 25_2253 | ctg7180001797294_6301_SAC  | 21133396 |
| 25_2254 | ctg7180001811035_3880_SCT  | 21139675 |
| 25_2255 | ctg7180001811035_3808_SCT  | 21139747 |
| 25_2256 | ctg7180001381434_2629_SCT  | 21146488 |
| 25_2257 | ctg7180001807626_20182_SGT | 21160697 |
| 25_2258 | ctg7180001807626_6031_SAG  | 21174889 |
| 25_2259 | ctg7180001909670_11250_SAC | 21243615 |
| 25_2260 | ctg7180001928231_7878_SAG  | 21254771 |
| 25_2261 | ctg7180001801910_5094_SAC  | 21275256 |
| 25_2262 | ctg7180001312822_423_SCT   | 21322062 |
| 25_2263 | ctg7180001316671_2081_SAG  | 21325251 |
| 25_2264 | ctg7180001316671_2260_SAG  | 21325430 |
| 25_2265 | ctg7180001801332_4222_SGT  | 21366092 |
| 25_2266 | ctg7180001184194_950_SAG   | 21386583 |
| 25_2267 | ctg7180001870139_12609_SCT | 21417445 |
| 25_2268 | ctg7180001266423_212_SAG   | 21443852 |
| 25_2269 | ctg7180001266423_1796_SAG  | 21445436 |
| 25_2270 | ctg7180001374284_1199_SGT  | 21450597 |
| 25_2271 | ctg7180001374284_4447_SAC  | 21451174 |

|         |                            |          |
|---------|----------------------------|----------|
| 25_2272 | ctg7180001374284_3061_SCT  | 21452560 |
| 25_2273 | ctg7180001364486_652_SGT   | 21458561 |
| 25_2274 | ctg7180001935877_6818_SGT  | 21473657 |
| 25_2275 | ctg7180001935877_9802_SAG  | 21476641 |
| 25_2276 | ctg7180001611627_875_SCT   | 21501636 |
| 25_2277 | ctg7180001807765_5176_SAG  | 21510103 |
| 25_2278 | ctg7180001807765_6324_SAG  | 21511251 |
| 25_2279 | ctg7180001807765_8552_SAG  | 21513479 |
| 25_2280 | ctg7180001807765_12239_SCT | 21517166 |
| 25_2281 | ctg7180001807765_12602_SCT | 21517529 |
| 25_2282 | ctg7180001686347_3940_SAC  | 21520585 |
| 25_2283 | ctg7180001686347_3880_SCT  | 21520645 |
| 25_2284 | ctg7180001686347_3850_SGT  | 21520675 |
| 25_2285 | ctg7180001686347_3432_SAC  | 21521093 |
| 25_2286 | ctg7180001686347_3288_SAG  | 21521237 |
| 25_2287 | ctg7180001686347_1121_SAG  | 21523404 |
| 25_2288 | ctg7180001650968_4164_SCT  | 21526767 |
| 25_2289 | ctg7180001650968_4053_SCT  | 21526878 |
| 25_2290 | ctg7180001650968_3376_SCT  | 21527555 |
| 25_2291 | ctg7180001650968_2266_SAC  | 21528665 |
| 25_2292 | ctg7180001650968_1794_SCT  | 21529137 |
| 25_2293 | ctg7180001650968_753_SAG   | 21530178 |
| 25_2294 | ctg7180001432126_177_SAC   | 21534653 |
| 25_2295 | ctg7180001793408_13362_SAG | 21535839 |
| 25_2296 | ctg7180001793408_12985_SAG | 21536216 |
| 25_2297 | ctg7180001793408_12890_SAC | 21536311 |
| 25_2298 | ctg7180001793408_10803_SGT | 21538398 |
| 25_2299 | ctg7180001793408_10559_SAG | 21538642 |
| 25_2300 | ctg7180001793408_10282_SGT | 21538919 |
| 25_2301 | ctg7180001793408_8546_SAG  | 21540655 |
| 25_2302 | ctg7180001793408_5023_SAG  | 21544178 |
| 25_2303 | ctg7180001793408_4069_SCT  | 21545132 |
| 25_2304 | ctg7180001793408_3952_SAC  | 21545249 |
| 25_2305 | ctg7180001290274_1702_SAC  | 21551470 |
| 25_2306 | ctg7180001793379_2965_SCT  | 21569303 |

|         |                            |          |
|---------|----------------------------|----------|
| 25_2307 | ctg7180001793379_4362_SAG  | 21570700 |
| 25_2308 | ctg7180001793379_7627_SAG  | 21573965 |
| 25_2309 | ctg7180001793379_9896_SGT  | 21576234 |
| 25_2310 | ctg7180001793379_13921_SGT | 21580259 |
| 25_2311 | ctg7180001793379_23853_SAC | 21590191 |
| 25_2312 | ctg7180001807506_286_SGT   | 21620702 |
| 25_2313 | ctg7180001807506_360_SAG   | 21620776 |
| 25_2314 | ctg7180001807506_515_SAG   | 21620931 |
| 25_2315 | ctg7180001807506_3330_SAG  | 21623746 |
| 25_2316 | ctg7180001807506_3608_SAG  | 21624024 |
| 25_2317 | ctg7180001807506_4303_SAG  | 21624719 |
| 25_2318 | ctg7180001807506_13109_SCT | 21633525 |
| 25_2319 | ctg7180001807506_16610_SAG | 21637026 |
| 25_2320 | ctg7180001859114_3165_SAG  | 21647188 |
| 25_2321 | ctg7180001322825_594_SGT   | 21651932 |
| 25_2322 | ctg7180001920867_1607      | 21654303 |
| 25_2323 | ctg7180001920867_12756_SCT | 21656176 |
| 25_2324 | ctg7180001920867_11975_SAG | 21656957 |
| 25_2325 | ctg7180001920867_9538_SAG  | 21659394 |
| 25_2326 | ctg7180001920867_9476_SCT  | 21659456 |
| 25_2327 | ctg7180001920867_9292_SCT  | 21659640 |
| 25_2328 | ctg7180001920867_8812_SGT  | 21660120 |
| 25_2329 | ctg7180001920867_5618_SAC  | 21663314 |
| 25_2330 | ctg7180001349905_1036_SAG  | 21671514 |
| 25_2331 | ctg7180001862705_772_SGT   | 21674694 |
| 25_2332 | ctg7180001862705_801_SAG   | 21674723 |
| 25_2333 | ctg7180001862705_971_SGT   | 21674893 |
| 25_2334 | ctg7180001862705_1046_SAG  | 21674968 |
| 25_2335 | ctg7180001823360_2441_SGT  | 21691755 |
| 25_2336 | ctg7180001823360_2587_SCT  | 21691901 |
| 25_2337 | ctg7180001823360_6153_SAC  | 21695467 |
| 25_2338 | ctg7180001491847_653_SAC   | 21704665 |
| 25_2339 | ctg7180001491847_573_SAG   | 21704745 |
| 25_2340 | ctg7180001491847_469_SAC   | 21704849 |
| 25_2341 | ctg7180001878791_352_SCT   | 21710003 |



|                                   |          |
|-----------------------------------|----------|
| 25_2342 ctg7180001878791_493_SAG  | 21710144 |
| 25_2343 ctg7180001878791_827_SAG  | 21710478 |
| 25_2344 ctg7180001829891_2226_SCT | 21728454 |
| 25_2345 ctg7180001491844_295_SAG  | 21734377 |
| 25_2346 ctg7180001491844_2909_SGT | 21736991 |
| 25_2347 ctg7180001491844_3203_SCT | 21737285 |
| 25_2348 ctg7180001491844_3360_SAC | 21737442 |
| 25_2349 ctg7180001817127_3063_SCT | 21763602 |
| 25_2350 ctg7180001817127_3220_SGT | 21763759 |
| 25_2351 ctg7180001184800_2270_SGT | 21782596 |
| 25_2352 ctg7180001184800_2608_SCT | 21782934 |
| 25_2353 ctg7180001184800_2633_SAG | 21782959 |
| 25_2354 ctg7180001184800_2817_SAG | 21783143 |
| 25_2355 ctg7180001184800_3767_SCT | 21784093 |
| 25_2356 ctg7180001429970_1274_SCT | 21792788 |
| 25_2357 ctg7180001436891_440_SCT  | 21794698 |
| 25_2358 ctg7180001340822_1087_SCT | 21815857 |
| 25_2359 ctg7180001861431_618_SAG  | 21827509 |
| 25_2360 ctg7180001861431_2233_SCT | 21829124 |
| 25_2361 ctg7180001311432_4813_SCT | 21834795 |
| 25_2362 ctg7180001311432_527_SGT  | 21839081 |
| 25_2363 ctg7180001796050_1612_SAC | 21855213 |
| 25_2364 ctg7180001627531_895_SAG  | 21858848 |
| 25_2365 ctg7180001257539_4482_SGT | 21864636 |
| 25_2366 ctg7180001294741_8006_SAG | 21884957 |
| 25_2367 ctg7180001881515_6475_SGT | 21920957 |
| 25_2368 ctg7180001903776_1712_SAG | 21959796 |
| 25_2369 ctg7180001223066_1043_SCT | 22003303 |
| 25_2370 ctg7180001624767_4399_SCT | 22010932 |
| 25_2371 ctg7180001624767_3721_SCT | 22011610 |
| 25_2372 ctg7180001624767_1738_SAG | 22013593 |
| 25_2373 ctg7180001624767_1634_SGT | 22013697 |
| 25_2374 ctg7180001873466_853_SAG  | 22016401 |
| 25_2375 ctg7180001873466_1109_SAG | 22016657 |
| 25_2376 ctg7180001873466_1956_SAC | 22017504 |

|         |                            |          |
|---------|----------------------------|----------|
| 25_2377 | ctg7180001923844_4458_SAG  | 22073247 |
| 25_2378 | ctg7180001923844_5281_SAC  | 22074070 |
| 25_2379 | ctg7180001923844_14623_SAC | 22083412 |
| 25_2380 | ctg7180001288750_1010_SCT  | 22095577 |
| 25_2381 | ctg7180001288750_625_SGT   | 22095962 |
| 25_2382 | ctg7180001821415_5215_SAG  | 22107846 |
| 25_2383 | ctg7180001821415_6691_SGT  | 22109322 |
| 25_2384 | ctg7180001821415_6954_SAG  | 22109585 |
| 25_2385 | ctg7180001821415_7514_SAC  | 22110145 |
| 25_2386 | ctg7180001821415_8455_SCT  | 22111086 |
| 25_2387 | ctg7180001666715_2324_SCT  | 22115437 |
| 25_2388 | ctg7180001666715_2079_SAC  | 22115682 |
| 25_2389 | ctg7180001458952_850_SGT   | 22118925 |
| 25_2390 | ctg7180001458952_2771_SAG  | 22120846 |
| 25_2391 | ctg7180001458952_3181_SAG  | 22121256 |
| 25_2392 | ctg7180001458952_3722_SCT  | 22121797 |
| 25_2393 | ctg7180001810544_2167_SAC  | 22158905 |
| 25_2394 | ctg7180001810544_777_SGT   | 22160295 |
| 25_2395 | ctg7180001789999_4918_SAG  | 22164893 |
| 25_2396 | ctg7180001846657_2944_SGT  | 22180654 |
| 25_2397 | ctg7180001601521_1662_SAG  | 22202508 |
| 25_2398 | ctg7180001601521_1647_SAC  | 22202523 |
| 25_2399 | ctg7180001601521_902_SAG   | 22203268 |
| 25_2400 | ctg7180001828382_2999_SAG  | 22207131 |
| 25_2401 | ctg7180001828382_5147_SCT  | 22209279 |
| 25_2402 | ctg7180001883264_2311_SCT  | 22236296 |
| 25_2403 | ctg7180001554359_1549_SCT  | 22249539 |
| 25_2404 | ctg7180001532522_325_SAC   | 22252751 |
| 25_2405 | ctg7180001882972_1388_SCT  | 22256369 |
| 25_2406 | ctg7180001882972_6315_SAC  | 22261296 |
| 25_2407 | ctg7180001430142_3963_SCT  | 22272417 |
| 25_2408 | ctg7180001848868_4040_SGT  | 22288658 |
| 25_2409 | ctg7180001848868_5769_SGT  | 22290387 |
| 25_2410 | ctg7180001848868_6089_SAC  | 22290707 |
| 25_2411 | ctg7180001534138_1505_SAC  | 22306526 |

|                                   |          |
|-----------------------------------|----------|
| 25_2412ctg7180001534138_1815_SAG  | 22306836 |
| 25_2413ctg7180001534138_4738_SAC  | 22309759 |
| 25_2414ctg7180001862341_2406_SGT  | 22323006 |
| 25_2415ctg7180001871617_2999_SAG  | 22356927 |
| 25_2416ctg7180001871617_2889_SAC  | 22357037 |
| 25_2417ctg7180001919974_11861_SCT | 22361396 |
| 25_2418ctg7180001919974_11551_SCT | 22361706 |
| 25_2419ctg7180001919974_3944_SCT  | 22369313 |
| 25_2420ctg7180001799518_4930_SAG  | 22414260 |
| 25_2421ctg7180001403415_1046_SAC  | 22442055 |
| 25_2422ctg7180001279571_4949_SAG  | 22443923 |
| 25_2423ctg7180001279571_4235_SAC  | 22444637 |
| 25_2424ctg7180001794875_670_SCT   | 22450483 |
| 25_2425ctg7180001794875_3739_SAC  | 22453552 |
| 25_2426ctg7180001794875_8504_SCT  | 22458984 |
| 25_2427ctg7180001907426_7096_SCT  | 22538209 |
| 25_2428ctg7180001874605_2094_SAG  | 22581028 |
| 25_2429ctg7180001874605_2485_SCT  | 22581419 |
| 25_2430ctg7180001874605_2544_SGT  | 22581478 |
| 25_2431ctg7180001887714_6419_SCT  | 22655512 |
| 25_2432GCR_cBin5128_Ctg1_77       | 22662454 |
| 25_2433ctg7180001658589_537_SCT   | 22668081 |
| 25_2434ctg7180001651396_999_SCT   | 22690012 |
| 25_2435ctg7180001651396_250_SAG   | 22690761 |
| 25_2436ctg7180001341023_1142_SAG  | 22699056 |
| 25_2437ctg7180001341023_1647_SAG  | 22699561 |
| 25_2438ctg7180001341023_1654_SAG  | 22699568 |
| 25_2439ctg7180001341023_1690_SCT  | 22699604 |
| 25_2440ctg7180001795950_3894_SAG  | 22706906 |
| 25_2441ctg7180001795950_4014_SAG  | 22707026 |
| 25_2442ctg7180001844146_7455_SAC  | 22722256 |
| 25_2443ctg7180001844146_4204_SCT  | 22725507 |
| 25_2444ctg7180001844146_3555_SAG  | 22726156 |
| 25_2445ctg7180001208382_5008_SAC  | 22738769 |
| 25_2446ctg7180001829093_10842_SAG | 22758578 |

|         |                            |          |
|---------|----------------------------|----------|
| 25_2447 | ctg7180001426531_2189_SAC  | 22765527 |
| 25_2448 | ctg7180001833332_8620_SGT  | 22822116 |
| 25_2449 | ctg7180001833332_10664_SAG | 22824160 |
| 25_2450 | ctg7180001833332_18340_SAG | 22831836 |
| 25_2451 | ctg7180001833332_37517_SAC | 22851013 |
| 25_2452 | ctg7180001833332_38049_SAG | 22851545 |
| 25_2453 | ctg7180001833332_38071_SAC | 22851567 |
| 25_2454 | ctg7180001833332_38125_SCT | 22851621 |
| 25_2455 | GCR_cBin17723_Ctg1_219     | 22892107 |
| 25_2456 | ctg7180001875223_5124_SAC  | 22902107 |
| 25_2457 | ctg7180001459204_2693_SAG  | 22910097 |
| 25_2458 | ctg7180001698483_1424_SAG  | 22926536 |
| 25_2459 | ctg7180001851856_2313_SCT  | 22934462 |
| 25_2460 | ctg7180001793040_1508_SAC  | 22944558 |
| 25_2461 | ctg7180001793040_9491_SCT  | 22952541 |
| 25_2462 | ctg7180001312216_453_SAG   | 22957303 |
| 25_2463 | ctg7180001312216_886_SAC   | 22957736 |
| 25_2464 | ctg7180001650710_5177_SCT  | 22960830 |
| 25_2465 | ctg7180001650710_3707_SCT  | 22962300 |
| 25_2466 | ctg7180001893481_395_SCT   | 22966775 |
| 25_2467 | ctg7180001820311_12112_SAG | 22976962 |
| 25_2468 | ctg7180001820311_11456_SCT | 22977618 |
| 25_2469 | ctg7180001820311_8927_SCT  | 22980147 |
| 25_2470 | ctg7180001625439_1325_SGT  | 22999330 |
| 25_2471 | ctg7180001625439_680_SAG   | 22999975 |
| 25_2472 | ctg7180001605156_3979_SCT  | 23002668 |
| 25_2473 | ctg7180001605156_3838_SCT  | 23002809 |
| 25_2474 | ctg7180001605156_2405_SGT  | 23004242 |
| 25_2475 | ctg7180001816210_2263_SGT  | 23012564 |
| 25_2476 | ctg7180001836737_10900_SCT | 23049299 |
| 25_2477 | ctg7180001932774_13448_SAG | 23083668 |
| 25_2478 | ctg7180001932774_9390_SAG  | 23087726 |
| 25_2479 | ctg7180001759736_1295_SCT  | 23106287 |
| 25_2480 | ctg7180001759736_1730_SAC  | 23106757 |
| 25_2481 | ctg7180001876505_22940_SAC | 23125524 |

|         |                            |          |
|---------|----------------------------|----------|
| 25_2482 | ctg7180001805811_413_SAC   | 23150528 |
| 25_2483 | ctg7180001805811_1425_SAC  | 23151540 |
| 25_2484 | ctg7180001742697_655_SAG   | 23164263 |
| 25_2485 | ctg7180001742697_362_SAC   | 23164556 |
| 25_2486 | ctg7180001867079_799_SCT   | 23197120 |
| 25_2487 | ctg7180001300731_1902_SCT  | 23247988 |
| 25_2488 | ctg7180001646097_1239_SGT  | 23289323 |
| 25_2489 | ctg7180001859286_1634_SGT  | 23345839 |
| 25_2490 | ctg7180001859286_3086_SAC  | 23347291 |
| 25_2491 | ctg7180001859286_5693_SCT  | 23349900 |
| 25_2492 | ctg7180001905813_17431_SAC | 23358102 |
| 25_2493 | ctg7180001905813_12652_SAG | 23362881 |
| 25_2494 | ctg7180001905813_12485_SAG | 23363048 |
| 25_2495 | ctg7180001905813_9093_SAC  | 23366440 |
| 25_2496 | ctg7180001905813_8162_SAG  | 23367371 |
| 25_2497 | ctg7180001934842_9090_SCT  | 23391426 |
| 25_2498 | ctg7180001934842_9459_SAC  | 23391795 |
| 25_2499 | ctg7180001934842_10575_SGT | 23392911 |
| 25_2500 | ctg7180001934842_15799_SAG | 23398135 |
| 25_2501 | ctg7180001839258_6103_SCT  | 23436886 |
| 25_2502 | ctg7180001839258_5597_SGT  | 23437392 |
| 25_2503 | ctg7180001808171_5950_SAG  | 23448951 |
| 25_2504 | ctg7180001497798_678_SCT   | 23459941 |
| 25_2505 | ctg7180001799852_13978_SAG | 23464043 |
| 25_2506 | ctg7180001799852_11462_SGT | 23466560 |
| 25_2507 | ctg7180001799852_2015_SAG  | 23476007 |
| 25_2508 | ctg7180001883966_1589_SAG  | 23509948 |
| 25_2509 | ctg7180001883966_1952_SAC  | 23510311 |
| 25_2510 | ctg7180001793742_3388_SCT  | 23517825 |
| 25_2511 | ctg7180001833116_4702_SCT  | 23568286 |
| 25_2512 | ctg7180001794170_1141_SCT  | 23602972 |
| 25_2513 | ctg7180001621394_735_SAC   | 23608839 |
| 25_2514 | ctg7180001386517_1153_SCT  | 23610949 |
| 25_2515 | ctg7180001849073_6259_SGT  | 23617947 |
| 25_2516 | ctg7180001883626_1084_SAC  | 23683273 |

|                                       |          |
|---------------------------------------|----------|
| 25_2517ctg7180001383086_3523_SAG      | 23702120 |
| 25_2518ctg7180001326003_5594_SAC      | 23718499 |
| 25_2519ctg7180001326003_5684_SGT      | 23718589 |
| 25_2520ctg7180001536526_1042_SGT      | 23734947 |
| 25_2521ctg7180001252143_12040_SAG     | 23750148 |
| 25_2522ctg7180001252143_11473_SAG     | 23750715 |
| 25_2523ctg7180001252143_10983_SCT     | 23751205 |
| 25_2524ctg7180001231622_641_SGT       | 23772561 |
| 25_2525ctg7180001234739_1745_SAG      | 23775086 |
| 25_2526ctg7180001388351_1544_SAG      | 23781288 |
| 25_2527ctg7180001807757_5110_SAG      | 23788724 |
| 25_2528ctg7180001807757_10409_SAG     | 23794022 |
| 25_2529ctg7180001511012_5394_SAG      | 23810311 |
| 25_2530ctg7180001511012_4713_SCT      | 23810992 |
| 25_2531ctg7180001602540_2770_SAC      | 23817731 |
| 25_2532ctg7180001796855_1599_SAC      | 23823291 |
| 25_2533ctg7180001826244_6747_SCT      | 23830349 |
| 25_2534ctg7180001826244_5594_SAC      | 23831502 |
| 25_2535ctg7180001937078_1888_SGT      | 23839356 |
| 25_2536ctg7180001937078_3338_SAG      | 23840806 |
| 25_2537ctg7180001937078_7377_SAG      | 23844845 |
| 25_2538ctg7180001836010_1012_SAG      | 23882827 |
| 25_2539ctg7180001836010_12023_SAG     | 23893838 |
| 25_2540ctg7180001740502_888_SAG       | 23899124 |
| 25_2541ctg7180001790770_2399_SAC      | 23931999 |
| 25_2542ctg7180001790770_2535_SAG      | 23932135 |
| 25_2543ctg7180001813366_1322_SAC      | 23938112 |
| 25_2544ctg7180001401300_7464_SCT      | 23957442 |
| 25_2545ctg7180001838061_6659_SAG      | 23985556 |
| 25_2546ctg7180001887214_6430_SGT      | 24019654 |
| 25_2547ctg7180001887214_15974_SCT     | 24029198 |
| 25_2548ctg7180001887214_1489524029359 |          |
| 25_2549ctg7180001838417_1400_SAC      | 24046692 |
| 25_2550ctg7180001523165_2271_SAC      | 24050124 |
| 25_2551ctg7180001509948_2655_SAC      | 24055993 |

|                                    |          |
|------------------------------------|----------|
| 25_2552 ctg7180001509948_1720_SAC  | 24056928 |
| 25_2553 ctg7180001509948_483_SAG   | 24058165 |
| 25_2554 ctg7180001564061_6196_SGT  | 24059415 |
| 25_2555 ctg7180001564061_2122_SCT  | 24063489 |
| 25_2556 GCR_cBin18679_Ctg1_42      | 24063801 |
| 25_2557 ctg7180001628350_2410_SGT  | 24078460 |
| 25_2558 ctg7180001832411_1600_SAG  | 24094492 |
| 25_2559 ctg7180001361822_1644_SGT  | 24116658 |
| 25_2560 ctg7180001361822_2076_SCT  | 24117090 |
| 25_2561 ctg7180001361822_4288_SCT  | 24119302 |
| 25_2562 ctg7180001361822_4331_SAG  | 24119345 |
| 25_2563 ctg7180001361822_6513_SCT  | 24121527 |
| 25_2564 ctg7180001361822_8027_SGT  | 24123041 |
| 25_2565 ctg7180001902122_5491_SCT  | 24147018 |
| 25_2566 ctg7180001902121_3231_SCT  | 24155159 |
| 25_2567 ctg7180001860867_4339_SAG  | 24166890 |
| 25_2568 ctg7180001860867_4784_SAG  | 24167335 |
| 25_2569 ctg7180001860867_4925_SAG  | 24167476 |
| 25_2570 ctg7180001804456_1656_SCT  | 24186421 |
| 25_2571 ctg7180001842907_3187_SAC  | 24193716 |
| 25_2572 ctg7180001889095_10958_SCT | 24225197 |
| 25_2573 ctg7180001798138_5554_SAG  | 24237354 |
| 25_2574 ctg7180001827809_1562_SAC  | 24249965 |
| 25_2575 ctg7180001827809_1949_SAC  | 24250352 |
| 25_2576 ctg7180001827809_2383_SGT  | 24250786 |
| 25_2577 ctg7180001827809_2984_SAG  | 24251387 |
| 25_2578 ctg7180001846839_9532_SAG  | 24266454 |
| 25_2579 ctg7180001834597_7217_SCT  | 24319892 |
| 25_2580 ctg7180001326695_380_SCT   | 24356603 |
| 25_2581 ctg7180001839420_10052_SCT | 24375474 |
| 25_2582 ctg7180001491983_1843_SAG  | 24408740 |
| 25_2583 ctg7180001900919_514_SCT   | 24411617 |
| 25_2584 ctg7180001376968_2425_SCT  | 24440421 |
| 25_2585 ctg7180001603978_4213_SCT  | 24444976 |
| 25_2586 ctg7180001866016_810_SGT   | 24447091 |

|                                   |          |
|-----------------------------------|----------|
| 25_2587ctg7180001927673_3326_SCT  | 24456476 |
| 25_2588ctg7180001926086_5976_SAG  | 24568019 |
| 25_2589ctg7180001807186_269_SAC   | 24581969 |
| 25_2590ctg7180001795378_9150_SAG  | 24614143 |
| 25_2591ctg7180001795378_8779_SGT  | 24614514 |
| 25_2592ctg7180001929973_319_SGT   | 24624089 |
| 25_2593ctg7180001929973_2312_SAC  | 24626082 |
| 25_2594ctg7180001848015_7035_SAC  | 24634547 |
| 25_2595ctg7180001848015_6680_SCT  | 24634902 |
| 25_2596ctg7180001819524_230_SGT   | 24646871 |
| 25_2597ctg7180001819524_2434_SGT  | 24649018 |
| 25_2598ctg7180001819524_3619_SAC  | 24650203 |
| 25_2599ctg7180001819524_3673_SCT  | 24650257 |
| 25_2600ctg7180001804895_1480_SAG  | 24654430 |
| 25_2601ctg7180001804895_1891_SAG  | 24654841 |
| 25_2602ctg7180001897349_4664_SGT  | 24692279 |
| 25_2603ctg7180001431420_4288_SAG  | 24735120 |
| 25_2604ctg7180001908717_8886_SGT  | 24942051 |
| 25_2605ctg7180001342874_1990_SCT  | 24954893 |
| 25_2606ctg7180001851775_10268_SAG | 24993831 |
| 25_2607ctg7180001852750_2827_SCT  | 25051753 |
| 25_2608ctg7180001852750_2857_SGT  | 25051783 |
| 25_2609ctg7180001344143_1257_SAC  | 25152690 |
| 25_2610ctg7180001801534_2562_SAC  | 25236426 |
| 25_2611ctg7180001801534_2954_SCT  | 25236818 |
| 25_2612ctg7180001823194_3283_SAG  | 25252067 |
| 25_2613ctg7180001368843_2148_SAG  | 25263062 |
| 25_2614ctg7180001887122_2376_SAC  | 25269171 |
| 25_2615ctg7180001808600_864_SAG   | 25288149 |
| 25_2616ctg7180001909190_4809_SCT  | 25411957 |
| 25_2617ctg7180001909190_8462_SAG  | 25415610 |
| 25_2618ctg7180001909190_10141_SGT | 25417289 |
| 25_2619ctg7180001909190_11355_SAC | 25418503 |
| 25_2620ctg7180001909190_11723_SCT | 25418871 |
| 25_2621ctg7180001810687_9623_SGT  | 25511043 |



|         |                            |          |
|---------|----------------------------|----------|
| 25_2622 | ctg7180001646273_1207_SAG  | 25525959 |
| 25_2623 | ctg7180001879511_8871_SAC  | 25572024 |
| 25_2624 | ctg7180001879511_9289_SCT  | 25572408 |
| 25_2625 | ctg7180001879511_15632_SCT | 25578751 |
| 25_2626 | ctg7180001922282_11638_SAG | 25587922 |
| 25_2627 | ctg7180001847893_12021_SAG | 25610681 |
| 25_2628 | ctg7180001797659_1636_SAG  | 25645878 |
| 25_2629 | ctg7180001797659_2360_SAG  | 25646602 |
| 25_2630 | ctg7180001797659_4356_SGT  | 25648598 |
| 25_2631 | ctg7180001797659_5080_SAC  | 25649322 |
| 25_2632 | ctg7180001797659_5326_SAC  | 25649568 |
| 25_2633 | ctg7180001892505_4274_SGT  | 25658483 |
| 25_2634 | ctg7180001638727_1744_SGT  | 25665264 |
| 25_2635 | ctg7180001629360_3057_SAG  | 25685385 |
| 25_2636 | ctg7180001332540_3961_SGT  | 25697390 |
| 25_2637 | ctg7180001881502_7331_SAG  | 25754715 |
| 25_2638 | ctg7180001809438_604_SCT   | 25797455 |
| 25_2639 | ctg7180001809438_3281_SGT  | 25800132 |
| 25_2640 | ctg7180001288827_3963_SAC  | 25823484 |
| 25_2641 | ctg7180001818863_6445_SAC  | 25830711 |
| 25_2642 | ctg7180001818863_5906_SCT  | 25831250 |
| 25_2643 | ctg7180001818863_5850_SAG  | 25831306 |
| 25_2644 | ctg7180001818863_4780_SCT  | 25832376 |
| 25_2645 | ctg7180001818863_4604_SCT  | 25832552 |
| 25_2646 | ctg7180001909574_1332_SAG  | 25844611 |
| 25_2647 | ctg7180001920579_17760_SCT | 25903811 |
| 25_2648 | ctg7180001920579_15383_SCT | 25906188 |
| 25_2649 | ctg7180001810860_3563_SCT  | 25919162 |
| 25_2650 | ctg7180001810446_15256_SAC | 26007254 |
| 25_2651 | ctg7180001815625_5541_SAC  | 26010115 |
| 25_2652 | ctg7180001847724_5692_SCT  | 26035258 |
| 25_2653 | ctg7180001869377_2533_SAG  | 26065458 |
| 25_2654 | ctg7180001915904_5521_SCT  | 26090974 |
| 25_2655 | ctg7180001485809_5173_SGT  | 26105559 |
| 25_2656 | ctg7180001485809_5337_SGT  | 26105723 |

|                                   |          |
|-----------------------------------|----------|
| 25_2657ctg7180001667431_8638_SAC  | 26122734 |
| 25_2658ctg7180001750134_1191_SAC  | 26143498 |
| 25_2659ctg7180001799374_9041_SCT  | 26153198 |
| 25_2660ctg7180001926764_1332_SAG  | 26223673 |
| 25_2661ctg7180001926764_5000_SGT  | 26227341 |
| 25_2662ctg7180001926764_5084_SCT  | 26227425 |
| 25_2663ctg7180001926764_7995_SCT  | 26230336 |
| 25_2664ctg7180001926764_16522_SAG | 26238863 |
| 25_2665ctg7180001926764_16755_SCT | 26239096 |
| 25_2666ctg7180001926764_17932_SAC | 26240273 |
| 25_2667ctg7180001926764_25794_SCT | 26248135 |
| 25_2668ctg7180001556422_1684_SAC  | 26260899 |
| 25_2669ctg7180001556422_2690_SCT  | 26261905 |
| 25_2670ctg7180001556422_4022_SCT  | 26263237 |
| 25_2671ctg7180001556422_4971_SCT  | 26264186 |
| 25_2672ctg7180001926765_62_SAG    | 26275012 |
| 25_2673ctg7180001572310_383_SAG   | 26298683 |
| 25_2674ctg7180001796150_634_SGT   | 26338577 |
| 25_2675ctg7180001552604_2542_SAG  | 26363391 |
| 25_2676ctg7180001552604_1618_SAC  | 26364315 |
| 25_2677ctg7180001843752_2846_SAC  | 26378978 |
| 25_2678ctg7180001848002_1763_SAG  | 26401513 |
| 25_2679ctg7180001848002_2126_SAG  | 26401876 |
| 25_2680ctg7180001848002_3045_SGT  | 26402804 |
| 25_2681ctg7180001909149_1310_SCT  | 26404476 |
| 25_2682ctg7180001909149_2700_SCT  | 26405866 |
| 25_2683ctg7180001909149_5314_SAG  | 26408480 |
| 25_2684ctg7180001909149_5744_SAC  | 26408910 |
| 25_2685ctg7180001909149_6270_SCG  | 26409436 |
| 25_2686ctg7180001909149_10850_SGT | 26414193 |
| 25_2687ctg7180001840150_6727_SCT  | 26425690 |
| 25_2688ctg7180001179486_1317_SCT  | 26434112 |
| 25_2689ctg7180001740781_746_SGT   | 26448490 |
| 25_2690ctg7180001740781_555_SAC   | 26448681 |
| 25_2691ctg7180001371990_5192_SCT  | 26451132 |

|                                   |          |
|-----------------------------------|----------|
| 25_2692ctg7180001248702_3880_SCT  | 26497967 |
| 25_2693ctg7180001248702_1721_SAC  | 26500126 |
| 25_2694ctg7180001571548_1236_SCT  | 26503272 |
| 25_2695ctg7180001909883_13063_SAG | 26512184 |
| 25_2696ctg7180001909883_11784_SGT | 26513463 |
| 25_2697ctg7180001909883_4360_SCT  | 26520887 |
| 25_2698ctg7180001909883_3834_SCT  | 26521413 |
| 25_2699ctg7180001909883_3422_SCT  | 26521825 |
| 25_2700ctg7180001645641_4184_SAG  | 26534461 |
| 25_2701ctg7180001645641_3874_SAG  | 26534771 |
| 25_2702ctg7180001910271_11497_SAC | 26541046 |
| 25_2703ctg7180001910271_4553_SCT  | 26547990 |
| 25_2704ctg7180001864701_272_SAG   | 26568573 |
| 25_2705ctg7180001906163_14150_SCT | 26599564 |
| 25_2706ctg7180001906163_14052_SAG | 26599662 |
| 25_2707ctg7180001906163_13281_SGT | 26600433 |
| 25_2708ctg7180001906163_11354_SAG | 26602360 |
| 25_2709ctg7180001906163_6106_SGT  | 26607608 |
| 25_2710ctg7180001906163_5153_SAC  | 26608561 |
| 25_2711ctg7180001906163_3784_SAC  | 26609930 |
| 25_2712ctg7180001814335_3074_SGT  | 26643301 |
| 25_2713ctg7180001651744_5438_SGT  | 26654623 |
| 25_2714ctg7180001841417_3732_SAG  | 26678726 |
| 25_2715ctg7180001841417_3420_SAG  | 26679038 |
| 25_2716ctg7180001863254_2710_SAC  | 26695129 |
| 25_2717ctg7180001245222_328_SCT   | 26703084 |
| 25_2718ctg7180001543199_1403_SAG  | 26708776 |
| 25_2719ctg7180001892535_1487_SCT  | 26726038 |
| 25_2720ctg7180001805422_72_SGT    | 26727690 |
| 25_2721ctg7180001805422_2701_SCT  | 26730319 |
| 25_2722ctg7180001759139_75_SAC    | 26755928 |
| 25_2723ctg7180001238763_4003_SAG  | 26778862 |
| 25_2724ctg7180001832421_1387_SAC  | 26833368 |
| 25_2725ctg7180001673163_1290_SAC  | 26857896 |
| 25_2726ctg7180001908182_462_SCT   | 26865493 |

|         |                            |          |
|---------|----------------------------|----------|
| 25_2727 | ctg7180001908182_2500_SGT  | 26867531 |
| 25_2728 | ctg7180001908182_3287_SCT  | 26868318 |
| 25_2729 | ctg7180001908183_22553_SAC | 26893211 |
| 25_2730 | ctg7180001908183_28047_SCT | 26898705 |
| 25_2731 | ctg7180001881155_4952_SAG  | 26915013 |
| 25_2732 | ctg7180001881155_3712_SAC  | 26916253 |
| 25_2733 | ctg7180001881155_3402_SGT  | 26916563 |
| 25_2734 | ctg7180001881155_2980_SAC  | 26916985 |
| 25_2735 | ctg7180001881155_9052_SCT  | 26920116 |
| 25_2736 | ctg7180001858811_994_SGT   | 26928936 |
| 25_2737 | ctg7180001529109_398_SAG   | 26979347 |
| 25_2738 | ctg7180001793736_5914_SAC  | 27028965 |
| 25_2739 | ctg7180001793736_5658_SGT  | 27029221 |
| 25_2740 | ctg7180001793736_5570_SGT  | 27029309 |
| 25_2741 | ctg7180001793736_5451_SGT  | 27029428 |
| 25_2742 | GCR_cBin47052_Ctg1_234     | 27032128 |
| 25_2743 | ctg7180001292259_587_SAG   | 27076886 |
| 25_2744 | ctg7180001813894_2633_SCT  | 27152882 |
| 25_2745 | ctg7180001725541_1818_SGT  | 27174373 |
| 25_2746 | ctg7180001881503_15830_SCT | 27204585 |
| 25_2747 | ctg7180001881503_24961_SGT | 27213715 |
| 25_2748 | ctg7180001896200_3571_SAG  | 27221901 |
| 25_2749 | ctg7180001896200_9297_SAC  | 27227627 |
| 25_2750 | ctg7180001797414_7278_SAG  | 27325964 |
| 25_2751 | ctg7180001797414_6168_SCT  | 27327074 |
| 25_2752 | ctg7180001886067_8522_SAG  | 27349737 |
| 25_2753 | ctg7180001677000_945_SAG   | 27406364 |
| 25_2754 | ctg7180001872241_9060_SAG  | 27423764 |
| 25_2755 | ctg7180001872241_9100_SGT  | 27423804 |
| 25_2756 | ctg7180001355208_954_SAC   | 27427683 |
| 25_2757 | ctg7180001802525_3389_SAG  | 27490816 |
| 25_2758 | ctg7180001802525_3445_SGT  | 27490872 |
| 25_2759 | ctg7180001802525_4387_SCT  | 27491814 |
| 25_2760 | ctg7180001802525_4543_SAC  | 27491970 |
| 25_2761 | ctg7180001807588_3663_SAC  | 27496674 |

|         |                            |          |
|---------|----------------------------|----------|
| 25_2762 | ctg7180001807588_5508_SAG  | 27498519 |
| 25_2763 | ctg7180001807588_6113_SAC  | 27499124 |
| 25_2764 | ctg7180001807588_7224_SAC  | 27500235 |
| 25_2765 | ctg7180001807588_8233_SAC  | 27501244 |
| 25_2766 | ctg7180001778678_2801_SCT  | 27542432 |
| 25_2767 | ctg7180001720772_483_SAC   | 27549801 |
| 25_2768 | ctg7180001817064_13105_SAC | 27567664 |
| 25_2769 | ctg7180001817064_12034_SAG | 27568735 |
| 25_2770 | ctg7180001817064_3865_SAG  | 27576904 |
| 25_2771 | ctg7180001915338_4230_SAC  | 27582050 |
| 25_2772 | ctg7180001915338_3917_SCT  | 27582363 |
| 25_2773 | ctg7180001682865_3897_SGT  | 27589118 |
| 25_2774 | ctg7180001682865_2723_SAG  | 27590292 |
| 25_2775 | ctg7180001682865_844_SAG   | 27592171 |
| 25_2776 | ctg7180001682865_539_SGT   | 27592476 |
| 25_2777 | ctg7180001895961_1220_SAG  | 27594608 |
| 25_2778 | ctg7180001895961_1823_SGT  | 27595211 |
| 25_2779 | ctg7180001895961_7438_SAG  | 27600826 |
| 25_2780 | ctg7180001895961_18190_SAG | 27611578 |
| 25_2781 | ctg7180001895961_23865_SAG | 27617253 |
| 25_2782 | ctg7180001895961_23990_SGT | 27617378 |
| 25_2783 | ctg7180001299944_220_SGT   | 27722326 |
| 25_2784 | ctg7180001892186_3744_SAG  | 27738756 |
| 25_2785 | ctg7180001892186_7016_SCT  | 27742028 |
| 25_2786 | ctg7180001890747_5388_SGT  | 27749268 |
| 25_2787 | ctg7180001616982_866_SAG   | 27755437 |
| 25_2788 | ctg7180001616982_3976      | 27758582 |
| 25_2789 | ctg7180001711354_1240_SAG  | 27782296 |
| 25_2790 | ctg7180001711354_2064_SGT  | 27783120 |
| 25_2791 | ctg7180001850807_4763_SCT  | 27803001 |
| 25_2792 | ctg7180001812413_3913_SGT  | 27810215 |
| 25_2793 | ctg7180001829588_2800_SAC  | 27814838 |
| 25_2794 | ctg7180001829588_1980_SGT  | 27815658 |
| 25_2795 | ctg7180001898325_3997_SGT  | 27831650 |
| 25_2796 | ctg7180001898325_3546_SAG  | 27832101 |

|         |                            |          |
|---------|----------------------------|----------|
| 25_2797 | ctg7180001804408_2270_SAG  | 27857394 |
| 25_2798 | ctg7180001659224_5777_SGT  | 27861558 |
| 25_2799 | ctg7180001659224_2633_SGT  | 27864702 |
| 25_2800 | ctg7180001659224_2623_SCT  | 27864712 |
| 25_2801 | ctg7180001854008_612_SGT   | 27873001 |
| 25_2802 | ctg7180001854008_11471_SAG | 27883859 |
| 25_2803 | ctg7180001854008_11656_SAC | 27884044 |
| 25_2804 | ctg7180001854008_11986_SGT | 27884374 |
| 25_2805 | ctg7180001810525_4823_SAG  | 27894985 |
| 25_2806 | ctg7180001810525_4303_SGT  | 27895505 |
| 25_2807 | ctg7180001810525_4252_SAG  | 27895556 |
| 25_2808 | ctg7180001810525_3429_SAG  | 27896379 |
| 25_2809 | ctg7180001936957_1093_SAG  | 27920979 |
| 25_2810 | ctg7180001936957_11464_SAG | 27931350 |
| 25_2811 | ctg7180001837052_6107_SAC  | 27938312 |
| 25_2812 | ctg7180001837052_6186_SGT  | 27938391 |
| 25_2813 | ctg7180001805906_271_SGT   | 27941180 |
| 25_2814 | ctg7180001739004_612_SAG   | 27950589 |
| 25_2815 | ctg7180001884023_13858_SAG | 27965662 |
| 25_2816 | ctg7180001884023_15006_SGT | 27966810 |
| 25_2817 | ctg7180001347888_38_SAG    | 27995264 |
| 25_2818 | ctg7180001803568_9462_SCT  | 27996451 |
| 25_2819 | ctg7180001803568_9420_SAG  | 27996493 |
| 25_2820 | ctg7180001734714_331_SCT   | 28027109 |
| 25_2821 | ctg7180001798042_1011_SAG  | 28028647 |
| 25_2822 | ctg7180001355291_1188_SAC  | 28038772 |
| 25_2823 | ctg7180001880165_23989_SAG | 28040975 |
| 25_2824 | ctg7180001880165_23979_SAG | 28040985 |
| 25_2825 | ctg7180001880165_23719_SAG | 28041245 |
| 25_2826 | ctg7180001880165_23032_SGT | 28041932 |
| 25_2827 | ctg7180001880165_19433_SGT | 28045531 |
| 25_2828 | ctg7180001880165_12731_SCT | 28052233 |
| 25_2829 | ctg7180001880165_5795_SAC  | 28059169 |
| 25_2830 | ctg7180001880165_3669_SGT  | 28061295 |
| 25_2831 | ctg7180001880165_1540_SAG  | 28063424 |

|         |                            |          |
|---------|----------------------------|----------|
| 25_2832 | ctg7180001310771_6085_SAG  | 28070904 |
| 25_2833 | ctg7180001310771_4053_SGT  | 28072936 |
| 25_2834 | ctg7180001930952_1880_SGT  | 28092242 |
| 25_2835 | ctg7180001884987_2250_SCT  | 28113549 |
| 25_2836 | ctg7180001318378_2081_SAG  | 28118559 |
| 25_2837 | ctg7180001820033_94_SAG    | 28213026 |
| 25_2838 | ctg7180001890139_977_SAC   | 28250639 |
| 25_2839 | ctg7180001858643_2408_SGT  | 28286301 |
| 25_2840 | ctg7180001858643_3159_SCT  | 28287053 |
| 25_2841 | ctg7180001744667_582_SAG   | 28292829 |
| 25_2842 | ctg7180001726697_1384_SAC  | 28329580 |
| 25_2843 | ctg7180001542157_896_SGT   | 28342845 |
| 25_2844 | ctg7180001542157_1539_SAC  | 28343488 |
| 25_2845 | ctg7180001203108_914_SAG   | 28347797 |
| 25_2846 | ctg7180001920240_1767_SGT  | 28372407 |
| 25_2847 | ctg7180001934610_16099_SCT | 28434156 |
| 25_2848 | ctg7180001250661_1339_SGT  | 28450187 |
| 25_2849 | ctg7180001250661_954_SAC   | 28450573 |
| 25_2850 | ctg7180001583344_596_SCT   | 28509665 |
| 25_2851 | ctg7180001486290_2233_SCT  | 28530559 |
| 25_2852 | ctg7180001486290_6549_SCT  | 28534875 |
| 25_2853 | ctg7180001531535_539_SGT   | 28540775 |
| 25_2854 | ctg7180001793658_11980_SCT | 28560742 |
| 25_2855 | ctg7180001814248_9914_SAC  | 28576661 |
| 25_2856 | ctg7180001814248_10634_SAC | 28577381 |
| 25_2857 | ctg7180001794462_640_SAG   | 28596657 |
| 25_2858 | ctg7180001220062_4416_SAC  | 28615893 |
| 25_2859 | ctg7180001811241_779_SAG   | 28621093 |
| 25_2860 | ctg7180001850052_9238_SAG  | 28653832 |
| 25_2861 | ctg7180001850052_1764_SAC  | 28654448 |
| 25_2862 | ctg7180001252965_260_SAC   | 28663684 |
| 25_2863 | ctg7180001252965_684_SAC   | 28664108 |
| 25_2864 | ctg7180001252965_713_SAG   | 28664137 |
| 25_2865 | ctg7180001252965_1441_SAC  | 28664865 |
| 25_2866 | ctg7180001203353_845_SGT   | 28700414 |

|                                   |          |
|-----------------------------------|----------|
| 25_2867ctg7180001203353_446_SAC   | 28700813 |
| 25_2868ctg7180001670768_361_SAC   | 28701586 |
| 25_2869ctg7180001670768_1323_SAG  | 28702548 |
| 25_2870ctg7180001864496_5497_SAG  | 28718746 |
| 25_2871ctg7180001803002_2834_SCT  | 28729553 |
| 25_2872ctg7180001803002_5554_SAG  | 28732273 |
| 25_2873ctg7180001803002_8562_SCT  | 28735281 |
| 25_2874ctg7180001803002_9832_SAG  | 28736551 |
| 25_2875ctg7180001615289_1171_SAG  | 28764051 |
| 25_2876ctg7180001615289_5952_SAG  | 28768832 |
| 25_2877ctg7180001890621_2618_SAG  | 28773411 |
| 25_2878ctg7180001666522_817_SCT   | 28818010 |
| 25_2879ctg7180001293477_2088_SAG  | 28846264 |
| 25_2880ctg7180001217206_1077_SCT  | 28907969 |
| 25_2881ctg7180001530469_5173_SGT  | 28932316 |
| 25_2882ctg7180001530469_4083_SAG  | 28933406 |
| 25_2883ctg7180001933657_1850_SGT  | 28957398 |
| 25_2884ctg7180001598061_1328_SAC  | 28990635 |
| 25_2885ctg7180001598061_1544_SAG  | 28990851 |
| 25_2886ctg7180001598061_2099_SGT  | 28991582 |
| 25_2887ctg7180001598061_2370_SAG  | 28991856 |
| 25_2888ctg7180001598061_3248_SGT  | 28992731 |
| 25_2889ctg7180001856106_82_SAG    | 29002599 |
| 25_2890ctg7180001302654_903_SGT   | 29014598 |
| 25_2891ctg7180001244069_1355_SAG  | 29027850 |
| 25_2892ctg7180001290321_1250_SCT  | 29064200 |
| 25_2893ctg7180001824172_39_SAG    | 29065676 |
| 25_2894ctg7180001824172_1209_SCT  | 29066846 |
| 25_2895ctg7180001824172_6445_SCT  | 29072084 |
| 25_2896ctg7180001824172_9302_SAG  | 29074941 |
| 25_2897ctg7180001824172_11405_SAG | 29077044 |
| 25_2898ctg7180001824172_11430_SAC | 29077069 |
| 25_2899ctg7180001824172_14303_SGT | 29079942 |
| 25_2900ctg7180001824172_15048_SAG | 29080687 |
| 25_2901ctg7180001262024_1217_SAC  | 29086467 |



|                                    |          |
|------------------------------------|----------|
| 25_2902 ctg7180001897260_6908_SGT  | 29262924 |
| 25_2903 ctg7180001897260_4875_SGT  | 29264957 |
| 25_2904 ctg7180001897260_4837_SCT  | 29264995 |
| 25_2905 ctg7180001878766_3030_SCT  | 29280416 |
| 25_2906 ctg7180001878766_16713_SAG | 29280485 |
| 25_2907 ctg7180001878766_10495_SAC | 29286703 |
| 25_2908 ctg7180001878766_7706_SAG  | 29289318 |
| 25_2909 ctg7180001878766_7677_SGT  | 29289347 |
| 25_2910 ctg7180001878766_6197_SAG  | 29290827 |
| 25_2911 ctg7180001878766_3023_SCT  | 29294001 |
| 25_2912 ctg7180001878766_64_SAG    | 29296960 |
| 25_2913 ctg7180001928907_3979_SGT  | 29320669 |
| 25_2914 ctg7180001850326_3551_SCT  | 29331467 |
| 25_2915 ctg7180001867907_971_SAG   | 29342221 |
| 25_2916 ctg7180001318755_3540_SAG  | 29363276 |
| 25_2917 ctg7180001912739_11460_SAG | 29371511 |
| 25_2918 ctg7180001912739_4845_SGT  | 29378126 |
| 25_2919 ctg7180001897261_4133_SAG  | 29449426 |
| 25_2920 ctg7180001897260_11690_SCT | 29465290 |
| 25_2921 ctg7180001912739_973_SCT   | 29533194 |
| 25_2922 ctg7180001461624_781_SAC   | 29542902 |
| 25_2923 ctg7180001382838_1556_SAG  | 29562175 |
| 25_2924 ctg7180001866658_2239_SAG  | 29565256 |
| 25_2925 ctg7180001672640_171_SGT   | 29573435 |
| 25_2926 ctg7180001398019_426_SCT   | 29582983 |
| 25_2927 ctg7180001398019_581_SCT   | 29583138 |
| 25_2928 ctg7180001398019_989_SAG   | 29583546 |
| 25_2929 ctg7180001454085_593_SAC   | 29584493 |
| 25_2930 ctg7180001836683_2507_SAC  | 29638741 |
| 25_2931 ctg7180001209113_3557_SAC  | 29656054 |
| 25_2932 ctg7180001865551_2323_SAG  | 29681138 |
| 25_2933 ctg7180001845249_1659_SAC  | 29727703 |
| 25_2934 ctg7180001845249_1554_SCT  | 29727808 |
| 25_2935 ctg7180001845249_1137_SAG  | 29728225 |
| 25_2936 ctg7180001216953_316_SGT   | 29729971 |

|         |                            |          |
|---------|----------------------------|----------|
| 25_2937 | ctg7180001802915_4814_SCT  | 29768019 |
| 25_2938 | ctg7180001802915_4775_SCT  | 29768058 |
| 25_2939 | ctg7180001917706_9062_SAC  | 29802562 |
| 25_2940 | ctg7180001917706_14380_SCT | 29807880 |
| 25_2941 | ctg7180001917706_14401_SCT | 29807901 |
| 25_2942 | ctg7180001330474_865_SGT   | 29814320 |
| 25_2943 | ctg7180001330474_677_SCT   | 29814508 |
| 25_2944 | ctg7180001644326_6134_SGT  | 29825686 |
| 25_2945 | ctg7180001908924_3468_SAC  | 29837192 |
| 25_2946 | ctg7180001692110_3411_SAG  | 29856728 |
| 25_2947 | ctg7180001692110_4035_SAG  | 29857352 |
| 25_2948 | ctg7180001582221_149_SCT   | 29862664 |
| 25_2949 | ctg7180001582221_154_SCT   | 29862669 |
| 25_2950 | ctg7180001582221_2315_SCT  | 29864830 |
| 25_2951 | ctg7180001582221_5031_SCT  | 29867546 |
| 25_2952 | ctg7180001315442_979_SAC   | 29869279 |
| 25_2953 | ctg7180001870117_1584_SAG  | 29903855 |
| 25_2954 | ctg7180001870117_2029_SAG  | 29904300 |
| 25_2955 | ctg7180001870117_2231_SAG  | 29904502 |
| 25_2956 | ctg7180001234393_221_SAC   | 29918754 |
| 25_2957 | ctg7180001234393_440_SCT   | 29919008 |
| 25_2958 | ctg7180001693420_986_SCT   | 29927097 |
| 25_2959 | ctg7180001693420_1418_SCT  | 29927529 |
| 25_2960 | ctg7180001807319_7852_SAC  | 29965133 |
| 25_2961 | ctg7180001807319_8421_SAC  | 29965702 |
| 25_2962 | ctg7180001818793_1837_SAG  | 29988930 |
| 25_2963 | ctg7180001188116_941_SAC   | 30008231 |
| 25_2964 | ctg7180001464935_878_SGT   | 30064528 |
| 25_2965 | ctg7180001253623_1164_SCT  | 30068923 |
| 25_2966 | ctg7180001864314_2792_SAG  | 30086971 |
| 25_2967 | ctg7180001822007_6977_SAC  | 30169092 |
| 25_2968 | ctg7180001822007_13358_SAC | 30175393 |
| 25_2969 | ctg7180001822007_13624_SCT | 30175659 |
| 25_2970 | ctg7180001681060_902_SAG   | 30187943 |
| 25_2971 | ctg7180001934474_2121_SCT  | 30229233 |

|         |                            |          |
|---------|----------------------------|----------|
| 25_2972 | ctg7180001239531_859_SGT   | 30335953 |
| 25_2973 | ctg7180001821583_23119_SAC | 30401143 |
| 25_2974 | ctg7180001821583_13353_SAG | 30410909 |
| 25_2975 | ctg7180001821583_6282_SAG  | 30417980 |
| 25_2976 | ctg7180001821583_6232_SAG  | 30418030 |
| 25_2977 | ctg7180001808371_7464_SCT  | 30430661 |
| 25_2978 | ctg7180001880994_5033_SAG  | 30476638 |
| 25_2979 | ctg7180001880994_5886_SCT  | 30477491 |
| 25_2980 | ctg7180001920420_1660_SAC  | 30527509 |
| 25_2981 | ctg7180001920420_1843_SCT  | 30527692 |
| 25_2982 | ctg7180001920420_3854_SGT  | 30529703 |
| 25_2983 | ctg7180001822359_4933_SAG  | 30547796 |
| 25_2984 | ctg7180001854820_2321_SAG  | 30606194 |
| 25_2985 | ctg7180001820500_7963_SAC  | 30622992 |
| 25_2986 | ctg7180001474541_359_SAG   | 30636448 |
| 25_2987 | ctg7180001640803_4260_SAC  | 30655844 |
| 25_2988 | ctg7180001640803_1702_SCT  | 30658402 |
| 25_2989 | ctg7180001188067_3351_SAG  | 30665200 |
| 25_2990 | ctg7180001787598_1259_SAC  | 30673005 |
| 25_2991 | ctg7180001787598_5028_SGT  | 30676774 |
| 25_2992 | ctg7180001787598_6250_SAC  | 30677996 |
| 25_2993 | ctg7180001787598_13490_SAC | 30685236 |
| 25_2994 | ctg7180001787598_13920_SAG | 30685666 |
| 25_2995 | ctg7180001787598_14144_SAG | 30685890 |
| 25_2996 | ctg7180001847831_4122_SAC  | 30693397 |
| 25_2997 | ctg7180001888865_4372_SGT  | 30703186 |
| 25_2998 | ctg7180001888865_5730_SAC  | 30704544 |
| 25_2999 | ctg7180001888865_5755_SGT  | 30704569 |
| 25_3000 | ctg7180001888865_6345_SAC  | 30705159 |
| 25_3001 | ctg7180001794835_3991_SAC  | 30730961 |
| 25_3002 | ctg7180001794835_4242_SCT  | 30731212 |
| 25_3003 | ctg7180001794835_4356_SCT  | 30731326 |
| 25_3004 | ctg7180001794835_7755_SCT  | 30734725 |
| 25_3005 | ctg7180001809944_5435_SAG  | 30744692 |
| 25_3006 | ctg7180001910103_7836_SAC  | 30757256 |

|         |                            |          |
|---------|----------------------------|----------|
| 25_3007 | ctg7180001903518_7316_SAG  | 30773063 |
| 25_3008 | ctg7180001903518_12733_SAC | 30778480 |
| 25_3009 | ctg7180001903518_20315_SGT | 30786062 |
| 25_3010 | ctg7180001903518_22122_SAC | 30787869 |
| 25_3011 | ctg7180001857757_998_SAC   | 30820728 |
| 25_3012 | ctg7180001796120_1899      | 30836678 |
| 25_3013 | ctg7180001796120_18104_SAG | 30841972 |
| 25_3014 | ctg7180001796120_3316_SAC  | 30856760 |
| 25_3015 | ctg7180001796120_2902_SCT  | 30857174 |
| 25_3016 | ctg7180001796120_426_SAC   | 30859650 |
| 25_3017 | ctg7180001250872_2298_SCT  | 30863673 |
| 25_3018 | ctg7180001825589_4249_SAG  | 30892182 |
| 25_3019 | ctg7180001793469_18317_SAG | 30974121 |
| 25_3020 | ctg7180001793469_18194_SCT | 30974244 |
| 25_3021 | ctg7180001793469_16187_SAG | 30976251 |
| 25_3022 | ctg7180001793469_13086_SGT | 30979352 |
| 25_3023 | ctg7180001793469_13080_SAG | 30979358 |
| 25_3024 | ctg7180001793469_5889_SAG  | 30986549 |
| 25_3025 | ctg7180001819488_6968_SAG  | 31003051 |
| 25_3026 | ctg7180001819488_7105_SAC  | 31003188 |
| 25_3027 | ctg7180001819488_10387_SCT | 31006470 |
| 25_3028 | ctg7180001532820_439_SGT   | 31009122 |
| 25_3029 | ctg7180001222260_5699_SAC  | 31017140 |
| 25_3030 | ctg7180001356832_397_SCT   | 31018315 |
| 25_3031 | ctg7180001810039_9643_SAG  | 31030551 |
| 25_3032 | ctg7180001907873_21668_SCT | 31033299 |
| 25_3033 | ctg7180001907873_16812_SCT | 31038155 |
| 25_3034 | ctg7180001907873_16695_SCT | 31038272 |
| 25_3035 | ctg7180001930608_21460_SAG | 31072404 |
| 25_3036 | ctg7180001218565_1058_SGT  | 31101923 |
| 25_3037 | ctg7180001674656_106_SCT   | 31103681 |
| 25_3038 | ctg7180001674656_1232_SGT  | 31104350 |
| 25_3039 | ctg7180001845433_1994_SCT  | 31107713 |
| 25_3040 | ctg7180001758036_989_SGT   | 31140493 |
| 25_3041 | ctg7180001881120_4108_SCT  | 31154347 |

|         |                            |          |
|---------|----------------------------|----------|
| 25_3042 | ctg7180001900213_1150_SAC  | 31200584 |
| 25_3043 | ctg7180001550080_527_SGT   | 31217273 |
| 25_3044 | ctg7180001469039_1206_SAG  | 31219402 |
| 25_3045 | ctg7180001706295_6195_SCT  | 31242161 |
| 25_3046 | ctg7180001450249_2064_SAC  | 31288044 |
| 25_3047 | ctg7180001864724_23471_SAC | 31294987 |
| 25_3048 | ctg7180001864724_23044_SCT | 31295414 |
| 25_3049 | ctg7180001864724_22766_SAC | 31295692 |
| 25_3050 | ctg7180001864724_18036_SAG | 31299930 |
| 25_3051 | ctg7180001284260_3410_SAG  | 31323750 |
| 25_3052 | ctg7180001366305_426_SAC   | 31328084 |
| 25_3053 | ctg7180001366305_453_SAG   | 31328111 |
| 25_3054 | ctg7180001206932_5119_SCT  | 31337107 |
| 25_3055 | ctg7180001933217_793_SAG   | 31360827 |
| 25_3056 | ctg7180001473356_6167_SCT  | 31394327 |
| 25_3057 | ctg7180001284983_1329_SAG  | 31397973 |
| 25_3058 | ctg7180001851551_2190_SAG  | 31404191 |
| 25_3059 | ctg7180001873737_5462_SCT  | 31414929 |
| 25_3060 | ctg7180001568276_1979_SAG  | 31463004 |
| 25_3061 | ctg7180001712263_1256_SAG  | 31473813 |
| 25_3062 | ctg7180001835968_12285_SCT | 31489084 |
| 25_3063 | ctg7180001732846_971_SCT   | 31512399 |
| 25_3064 | ctg7180001855505_2421_SGT  | 31519712 |
| 25_3065 | ctg7180001855504_8387_SAG  | 31524108 |
| 25_3066 | ctg7180001855504_7857_SAG  | 31524638 |
| 25_3067 | ctg7180001855504_7775_SAG  | 31524720 |
| 25_3068 | ctg7180001855504_2065_SAG  | 31530430 |
| 25_3069 | ctg7180001440821_354_SCT   | 31548232 |
| 25_3070 | ctg7180001873209_5951_SGT  | 31568821 |
| 25_3071 | ctg7180001832172_5110_SGT  | 31580310 |
| 25_3072 | ctg7180001832172_5429_SAG  | 31580591 |
| 25_3073 | ctg7180001202253_310_SCT   | 31636951 |
| 25_3074 | ctg7180001535055_2196_SAG  | 31639571 |
| 25_3075 | ctg7180001535055_6818_SCT  | 31644193 |
| 25_3076 | ctg7180001814690_2905_SGT  | 31662031 |

|         |                            |          |
|---------|----------------------------|----------|
| 25_3077 | ctg7180001814690_1468_SAC  | 31663468 |
| 25_3078 | ctg7180001814690_1417_SAC  | 31663519 |
| 25_3079 | ctg7180001455661_1257_SAG  | 31666678 |
| 25_3080 | ctg7180001455661_1731_SAG  | 31667152 |
| 25_3081 | ctg7180001867595_6553_SAC  | 31688505 |
| 25_3082 | ctg7180001297570_5662_SGT  | 31694374 |
| 25_3083 | ctg7180001297570_5118_SGT  | 31694918 |
| 25_3084 | ctg7180001297570_4448_SCT  | 31695588 |
| 25_3085 | ctg7180001687140_4460_SAG  | 31715411 |
| 25_3086 | ctg7180001895160_82_SAC    | 31726004 |
| 25_3087 | ctg7180001920906_2968_SAG  | 31745840 |
| 25_3088 | ctg7180001924897_13573_SCT | 31776815 |
| 25_3089 | ctg7180001930595_4244_SAG  | 31810955 |
| 25_3090 | ctg7180001925718_5517_SAC  | 31835804 |
| 25_3091 | ctg7180001894543_427_SGT   | 31841458 |
| 25_3092 | ctg7180001894543_641_SAC   | 31841672 |
| 25_3093 | ctg7180001894543_1471_SGT  | 31842501 |
| 25_3094 | ctg7180001935817_636_SGT   | 31871802 |
| 25_3095 | ctg7180001935817_4926_SCT  | 31876092 |
| 25_3096 | ctg7180001554597_528_SGT   | 31907778 |
| 25_3097 | ctg7180001797056_401_SAG   | 31924850 |
| 25_3098 | ctg7180001324517_1256_SCT  | 31980156 |
| 25_3099 | ctg7180001864784_1232_SCT  | 31988929 |
| 25_3100 | ctg7180001864784_3801_SAG  | 31991533 |
| 25_3101 | ctg7180001864784_4906_SAG  | 31992603 |
| 25_3102 | ctg7180001856387_7909_SGT  | 32010907 |
| 25_3103 | GCR_cBin6868_Ctg1_157      | 32041804 |
| 25_3104 | ctg7180001363169_185_SAG   | 32073454 |
| 25_3105 | ctg7180001621626_175_SAG   | 32136343 |
| 25_3106 | ctg7180001798961_2910_SCT  | 32156414 |
| 25_3107 | ctg7180001821405_2974_SCT  | 32242252 |
| 25_3108 | ctg7180001248768_13681_SGT | 32266869 |
| 25_3109 | ctg7180001870040_5138_SGT  | 32305013 |
| 25_3110 | ctg7180001870040_6219_SCT  | 32306094 |
| 25_3111 | ctg7180001870040_8892_SAC  | 32308767 |

|                                   |          |
|-----------------------------------|----------|
| 25_3112ctg7180001267213_2822_SAG  | 32316665 |
| 25_3113ctg7180001852059_5165_SAG  | 32323895 |
| 25_3114ctg7180001852059_7123_SCT  | 32325853 |
| 25_3115ctg7180001852059_18722_SCT | 32337450 |
| 25_3116ctg7180001291594_8405_SCT  | 32352882 |
| 25_3117ctg7180001291594_10255_SCT | 32354732 |
| 25_3118ctg7180001291594_10383_SGT | 32354860 |
| 25_3119ctg7180001734517_847_SCT   | 32362494 |
| 25_3120ctg7180001674143_3046_SAG  | 32367191 |
| 25_3121ctg7180001822641_7324_SAG  | 32377444 |
| 25_3122ctg7180001822641_6991_SGT  | 32377777 |
| 25_3123ctg7180001822641_6767_SAG  | 32378001 |
| 25_3124ctg7180001846648_4396_SCT  | 32394899 |
| 25_3125ctg7180001591013_558_SCT   | 32412774 |
| 25_3126ctg7180001591013_1006_SCT  | 32413222 |
| 25_3127ctg7180001591013_3058_SCT  | 32415274 |
| 25_3128ctg7180001591013_3129_SCT  | 32415345 |
| 25_3129ctg7180001591013_3482_SAC  | 32415698 |
| 25_3130ctg7180001591013_4779_SGT  | 32416995 |
| 25_3131ctg7180001912785_9151_SGT  | 32430695 |
| 25_3132ctg7180001833998_2955_SCT  | 32455194 |
| 25_3133GCR_cBin19498_Ctg1_386     | 32455279 |
| 25_3134ctg7180001833998_3647_SCT  | 32455886 |
| 25_3135ctg7180001833998_3662_SGT  | 32455901 |
| 25_3136ctg7180001833998_4676_SAG  | 32456915 |
| 25_3137ctg7180001833998_8380_SCT  | 32460619 |
| 25_3138ctg7180001700374_2288_SAG  | 32467087 |
| 25_3139ctg7180001467679_1404_SAG  | 32485332 |
| 25_3140ctg7180001764529_420_SCT   | 32506208 |
| 25_3141ctg7180001764529_973_SCT   | 32506761 |
| 25_3142ctg7180001243965_1793_SGT  | 32539846 |
| 25_3143ctg7180001898673_3011_SAC  | 32610836 |
| 25_3144ctg7180001332357_534_SGT   | 32626052 |
| 25_3145ctg7180001602686_775_SAG   | 32670512 |
| 25_3146ctg7180001907984_3797_SAG  | 32740562 |

|                                   |          |
|-----------------------------------|----------|
| 25_3147ctg7180001907984_1576_SAG  | 32742783 |
| 25_3148ctg7180001265063_4186_SAG  | 32756024 |
| 25_3149ctg7180001233918_2980_SGT  | 32767884 |
| 25_3150ctg7180001233918_1788_SAG  | 32769076 |
| 25_3151ctg7180001920407_7504_SAC  | 32773199 |
| 25_3152ctg7180001920407_5688_SAC  | 32774793 |
| 25_3153ctg7180001246949_2200_SAG  | 32843888 |
| 25_3154ctg7180001870135_4457_SAG  | 32846575 |
| 25_3155ctg7180001870135_4153_SCT  | 32846879 |
| 25_3156ctg7180001483421_2193_SCT  | 32871023 |
| 25_3157ctg7180001528125_453_SGT   | 32874022 |
| 25_3158ctg7180001842975_12262_SAC | 32919784 |
| 25_3159ctg7180001842975_11184_SCT | 32920281 |
| 25_3160ctg7180001842975_2529_SAG  | 32928936 |
| 25_3161ctg7180001819701_5646_SAC  | 32932773 |
| 25_3162ctg7180001819701_3950_SCT  | 32934467 |
| 25_3163ctg7180001819701_3890_SCT  | 32934527 |
| 25_3164ctg7180001819701_3320_SCT  | 32935097 |
| 25_3165ctg7180001819701_3274_SAG  | 32935143 |
| 25_3166ctg7180001669479_3572_SAG  | 32942015 |
| 25_3167ctg7180001669479_2310_SCT  | 32943277 |
| 25_3168ctg7180001817619_1901_SAC  | 32961845 |
| 25_3169ctg7180001928497_2262_SAC  | 32983986 |
| 25_3170ctg7180001799909_4277_SAG  | 32997943 |
| 25_3171ctg7180001806381_4507_SCT  | 33006940 |
| 25_3172ctg7180001806381_4998_SGT  | 33007431 |
| 25_3173ctg7180001806381_5492_SCG  | 33007925 |
| 25_3174ctg7180001806381_5605_SAC  | 33008038 |
| 25_3175ctg7180001806381_6679_SGT  | 33009112 |
| 25_3176ctg7180001806381_7084_SAG  | 33009517 |
| 25_3177ctg7180001806381_7201_SCT  | 33009634 |
| 25_3178ctg7180001806381_8342_SAC  | 33010775 |
| 25_3179ctg7180001806381_8480_SAG  | 33010913 |
| 25_3180ctg7180001651443_74_SGT    | 33028036 |
| 25_3181ctg7180001620438_14440_SAG | 33037897 |



|         |                            |          |
|---------|----------------------------|----------|
| 25_3182 | ctg7180001620438_14271_SAG | 33038066 |
| 25_3183 | ctg7180001620438_7885_SCT  | 33044451 |
| 25_3184 | ctg7180001812132_2218_SCT  | 33072515 |
| 25_3185 | ctg7180001819404_3678_SCT  | 33084163 |
| 25_3186 | ctg7180001871769_1650_SCT  | 33125431 |
| 25_3187 | ctg7180001925758_4175_SCT  | 33181842 |
| 25_3188 | ctg7180001557598_10692_SCT | 33189200 |
| 25_3189 | ctg7180001557598_4374_SGT  | 33195518 |
| 25_3190 | ctg7180001557598_3625_SAG  | 33196267 |
| 25_3191 | ctg7180001557598_3542_SAG  | 33196350 |
| 25_3192 | ctg7180001557598_10431     | 33199084 |
| 25_3193 | ctg7180001869671_8558_SAG  | 33223462 |
| 25_3194 | ctg7180001869671_4273_SGT  | 33227798 |
| 25_3195 | ctg7180001869671_3245_SAC  | 33228826 |
| 25_3196 | ctg7180001869671_3148_SAC  | 33228923 |
| 25_3197 | ctg7180001743389_1159_SAG  | 33243925 |
| 25_3198 | ctg7180001458542_726_SGT   | 33265403 |
| 25_3199 | ctg7180001458542_2466_SAC  | 33267143 |
| 25_3200 | ctg7180001592017_482_SCT   | 33288134 |
| 25_3201 | ctg7180001894174_6017_SGT  | 33319444 |
| 25_3202 | ctg7180001812300_4924_SAC  | 33328955 |
| 25_3203 | ctg7180001753439_3487_SCT  | 33337827 |
| 25_3204 | ctg7180001826602_9447_SAG  | 33387033 |
| 25_3205 | ctg7180001826602_9631_SCT  | 33387217 |
| 25_3206 | ctg7180001826602_11089_SCT | 33388675 |
| 25_3207 | ctg7180001826602_12859_SAG | 33390445 |
| 25_3208 | ctg7180001810632_934_SAG   | 33465856 |
| 25_3209 | ctg7180001849173_3997_SCT  | 33470283 |
| 25_3210 | ctg7180001849173_3966_SAG  | 33470314 |
| 25_3211 | ctg7180001849173_3891_SGT  | 33470389 |
| 25_3212 | ctg7180001849173_2524_SGT  | 33471756 |
| 25_3213 | ctg7180001798421_12294_SGT | 33480385 |
| 25_3214 | ctg7180001798421_12206_SCT | 33480473 |
| 25_3215 | ctg7180001798421_6585_SAG  | 33486094 |
| 25_3216 | ctg7180001518282_65_SAG    | 33516306 |

|                                   |          |
|-----------------------------------|----------|
| 25_3217ctg7180001826346_9514_SAG  | 33518674 |
| 25_3218ctg7180001826346_495_SAG   | 33518811 |
| 25_3219ctg7180001826346_1217_SGT  | 33526971 |
| 25_3220ctg7180001857598_3494_SAG  | 33540549 |
| 25_3221ctg7180001848631_1468_SCG  | 33544383 |
| 25_3222ctg7180001837274_2716_SAG  | 33582357 |
| 25_3223ctg7180001858026_12856_SCT | 33594801 |
| 25_3224ctg7180001858026_6623_SAG  | 33601034 |
| 25_3225GCR_cBin26296_Ctg1_29      | 33607227 |
| 25_3226ctg7180001843146_1701      | 33620773 |
| 25_3227ctg7180001936873_3630_SAG  | 33729208 |
| 25_3228ctg7180001918356_5540_SAC  | 33811705 |
| 25_3229ctg7180001883697_10553_SAC | 33877163 |
| 25_3230ctg7180001897895_5470_SGT  | 33901338 |
| 25_3231ctg7180001897895_252_SCT   | 33907838 |
| 25_3232ctg7180001911769_3849_SGT  | 33947072 |
| 25_3233ctg7180001800060_13983_SCT | 33982647 |
| 25_3234ctg7180001798368_5287_SAG  | 34027620 |
| 25_3235ctg7180001806662_4169_SAT  | 34038338 |
| 25_3236ctg7180001829397_632_SAC   | 34043968 |
| 25_3237ctg7180001917367_4246_SAG  | 34064949 |
| 25_3238ctg7180001917367_4203_SGT  | 34064992 |
| 25_3239ctg7180001917367_3229_SAG  | 34065966 |
| 25_3240ctg7180001917367_2961_SGT  | 34066234 |
| 25_3241ctg7180001825712_4229_SAG  | 34073790 |
| 25_3242ctg7180001825712_9431_SCT  | 34078992 |
| 25_3243ctg7180001825712_22802_SCT | 34092363 |
| 25_3244ctg7180001825712_24943_SAC | 34094504 |
| 25_3245ctg7180001697421_1479_SGT  | 34108800 |
| 25_3246ctg7180001697421_751_SAG   | 34109528 |
| 25_3247ctg7180001895945_1185_SAG  | 34129027 |
| 25_3248ctg7180001446879_1992_SAC  | 34146394 |
| 25_3249ctg7180001446879_1451_SGT  | 34146935 |
| 25_3250ctg7180001682841_2977_SCT  | 34234390 |
| 25_3251ctg7180001842668_3905_SAG  | 34252576 |

|         |                            |          |
|---------|----------------------------|----------|
| 25_3252 | ctg7180001905078_9228_SAG  | 34280169 |
| 25_3253 | ctg7180001905078_12061_SAG | 34283002 |
| 25_3254 | ctg7180001796351_106_SAG   | 34309677 |
| 25_3255 | ctg7180001871390_5585_SAG  | 34334659 |
| 25_3256 | ctg7180001835062_1081_SCT  | 34360452 |
| 25_3257 | ctg7180001271576_1586_SAG  | 34364814 |
| 25_3258 | ctg7180001514338_2289_SGT  | 34394023 |
| 25_3259 | ctg7180001928849_960_SGT   | 34403807 |
| 25_3260 | ctg7180001440741_3495_SCT  | 34405814 |
| 25_3261 | ctg7180001815861_2328_SAG  | 34420409 |
| 25_3262 | ctg7180001792972_7815_SCT  | 34432503 |
| 25_3263 | ctg7180001792972_11387_SAG | 34436075 |
| 25_3264 | ctg7180001792972_13794_SAC | 34438482 |
| 25_3265 | ctg7180001895759_5407_SCT  | 34462413 |
| 25_3266 | ctg7180001895759_5446_SGT  | 34462452 |
| 25_3267 | ctg7180001195115_336_SGT   | 34476866 |
| 25_3268 | ctg7180001195115_140_SCT   | 34477062 |
| 25_3269 | ctg7180001819610_1037_SCT  | 34480533 |
| 25_3270 | ctg7180001819610_1092_SCT  | 34480588 |
| 25_3271 | ctg7180001820342_11103_SGT | 34503304 |
| 25_3272 | ctg7180001860624_345_SAG   | 34543256 |
| 25_3273 | ctg7180001603393_1400_SCT  | 34605894 |
| 25_3274 | ctg7180001880823_384_SAG   | 34617061 |
| 25_3275 | ctg7180001906056_111_SCT   | 34716290 |
| 25_3276 | ctg7180001906054_6895_SAG  | 34733895 |
| 25_3277 | ctg7180001854470_3239_SGT  | 34743750 |
| 25_3278 | ctg7180001798478_3205_SGT  | 34890271 |
| 25_3279 | ctg7180001855610_3963_SAC  | 34901107 |
| 25_3280 | ctg7180001855610_6778_SAG  | 34903922 |
| 25_3281 | ctg7180001553822_361_SCT   | 34909576 |
| 25_3282 | ctg7180001553822_737_SGT   | 34909952 |
| 25_3283 | ctg7180001553822_849_SGT   | 34910064 |
| 25_3284 | ctg7180001469611_68_SAC    | 35011018 |
| 25_3285 | ctg7180001480439_1057_SAG  | 35015309 |
| 25_3286 | ctg7180001446145_1118_SGT  | 35024620 |

|         |                            |          |
|---------|----------------------------|----------|
| 25_3287 | ctg7180001821014_1580_SCT  | 35049116 |
| 25_3288 | ctg7180001821014_1394_SGT  | 35049302 |
| 25_3289 | ctg7180001573080_1930_SAG  | 35055731 |
| 25_3290 | ctg7180001474425_1255_SAG  | 35090997 |
| 25_3291 | ctg7180001474425_1327_SAC  | 35091034 |
| 25_3292 | ctg7180001474425_1731_SCT  | 35091438 |
| 25_3293 | ctg7180001666935_647_SAG   | 35116630 |
| 25_3294 | ctg7180001820518_7450_SAG  | 35156938 |
| 25_3295 | ctg7180001820518_3027_SCT  | 35161361 |
| 25_3296 | ctg7180001820518_1545_SCT  | 35162843 |
| 25_3297 | ctg7180001290019_1071_SCT  | 35255524 |
| 25_3298 | ctg7180001290019_3316_SGT  | 35257769 |
| 25_3299 | ctg7180001825547_2673_SGT  | 35306795 |
| 25_3300 | ctg7180001572779_431_SAG   | 35332638 |
| 25_3301 | ctg7180001932625_965_SCT   | 35334947 |
| 25_3302 | ctg7180001886705_9693_SCT  | 35351743 |
| 25_3303 | ctg7180001725696_1197_SAG  | 35378955 |
| 25_3304 | ctg7180001497252_329_SCT   | 35381055 |
| 25_3305 | ctg7180001815958_8569_SAG  | 35394622 |
| 25_3306 | ctg7180001815958_1167_SAC  | 35404984 |
| 25_3307 | ctg7180001815958_626_SCT   | 35405525 |
| 25_3308 | ctg7180001815958_98_SCT    | 35406053 |
| 25_3309 | ctg7180001900828_2672_SAC  | 35409725 |
| 25_3310 | ctg7180001803075_1535_SAC  | 35441935 |
| 25_3311 | ctg7180001857680_5268_SAG  | 35476535 |
| 25_3312 | ctg7180001614018_5633_SCT  | 35544134 |
| 25_3313 | ctg7180001253261_13703_SAG | 35560184 |
| 25_3314 | ctg7180001887854_15788_SAG | 35591622 |
| 25_3315 | ctg7180001887854_15708_SAG | 35591702 |
| 25_3316 | ctg7180001887854_15453_SAG | 35591957 |
| 25_3317 | ctg7180001887854_14925_SAG | 35592485 |
| 25_3318 | ctg7180001887854_11736_SAG | 35595674 |
| 25_3319 | ctg7180001887853_6538_SAC  | 35608431 |
| 25_3320 | ctg7180001682858_932_SAG   | 35615983 |
| 25_3321 | ctg7180001682858_1027_SAC  | 35616078 |

|         |                            |          |
|---------|----------------------------|----------|
| 25_3322 | ctg7180001808019_4084_SAC  | 35625619 |
| 25_3323 | ctg7180001808019_4556_SGT  | 35626091 |
| 25_3324 | ctg7180001808019_4802_SGT  | 35626337 |
| 25_3325 | ctg7180001808019_8231_SAG  | 35629766 |
| 25_3326 | ctg7180001808019_11817_SAG | 35633352 |
| 25_3327 | ctg7180001808019_11911_SAC | 35633446 |
| 25_3328 | ctg7180001808019_12194_SGT | 35633729 |
| 25_3329 | ctg7180001808019_17061_SGT | 35638596 |
| 25_3330 | ctg7180001663464_3981_SCT  | 35646335 |
| 25_3331 | ctg7180001817497_3157_SCT  | 35671527 |
| 25_3332 | ctg7180001338613_504_SAG   | 35697013 |
| 25_3333 | ctg7180001822705_2298_SAG  | 35702146 |
| 25_3334 | ctg7180001559379_1894_SAG  | 35717450 |
| 25_3335 | ctg7180001208791_3624_SAG  | 35723975 |
| 25_3336 | ctg7180001208791_4888_SCT  | 35725239 |
| 25_3337 | ctg7180001365528_584_SCT   | 35748216 |
| 25_3338 | ctg7180001864821_2983      | 35786944 |
| 25_3339 | ctg7180001864821_14937_SAG | 35798864 |
| 25_3340 | ESTNV_29854_323            | 35831634 |
| 25_3341 | ctg7180001934334_7741_SAC  | 35844773 |
| 25_3342 | ctg7180001872619_4808_SCT  | 35863935 |
| 25_3343 | ctg7180001937288_17023_SAC | 35881515 |
| 25_3344 | ctg7180001816502_3612_SAG  | 35890858 |
| 25_3345 | ctg7180001332636_1889_SGT  | 35911981 |
| 25_3346 | ctg7180001332636_2691_SAC  | 35912783 |
| 25_3347 | ctg7180001332636_4818_SCT  | 35914910 |
| 25_3348 | ctg7180001516401_414_SAG   | 35916252 |
| 25_3349 | ctg7180001891828_1754_SGT  | 35952429 |
| 25_3350 | ctg7180001931701_2438_SAC  | 35974411 |
| 25_3351 | ctg7180001931701_2655_SAG  | 35974628 |
| 25_3352 | ctg7180001931701_2850_SAG  | 35974823 |
| 25_3353 | ctg7180001897479_4396_SCT  | 35986204 |
| 25_3354 | ctg7180001930856_215_SCT   | 36012305 |
| 25_3355 | ctg7180001902356_4052_SAG  | 36014836 |
| 25_3356 | ctg7180001904926_4123_SAG  | 36040571 |

|                                   |          |
|-----------------------------------|----------|
| 25_3357ctg7180001904926_5253_SCT  | 36041701 |
| 25_3358ctg7180001904926_9625_SAG  | 36046073 |
| 25_3359ctg7180001904926_9773_SCT  | 36046221 |
| 25_3360ctg7180001904926_10804_SCT | 36047252 |
| 25_3361ctg7180001904926_12451_SCT | 36048899 |
| 25_3362ctg7180001584091_868_SGT   | 36061344 |
| 25_3363ctg7180001902761_6083_SAG  | 36069057 |
| 25_3364ctg7180001902761_5333_SAC  | 36069807 |
| 25_3365ctg7180001793180_11163_SAC | 36076383 |
| 25_3366ctg7180001793180_11085_SCT | 36076461 |
| 25_3367ctg7180001793180_8400_SAG  | 36079146 |
| 25_3368ctg7180001793180_3785_SCT  | 36083467 |
| 25_3369ctg7180001873070_9956_SAG  | 36088229 |
| 25_3370ctg7180001873070_9410_SCT  | 36088775 |
| 25_3371ctg7180001873070_8381_SAC  | 36089804 |
| 25_3372ctg7180001873070_8357_SAC  | 36089828 |
| 25_3373ctg7180001873070_1312_SAG  | 36096873 |
| 25_3374ctg7180001201619_346_SCT   | 36101797 |
| 25_3375ctg7180001247823_4760_SAG  | 36107849 |
| 25_3376ctg7180001549079_1450_SAG  | 36123413 |
| 25_3377ctg7180001909657_4919_SAG  | 36137488 |
| 25_3378ctg7180001909657_418_SAG   | 36141990 |
| 25_3379ctg7180001899531_11381_SCT | 36198897 |
| 25_3380ctg7180001899531_7766_SCT  | 36202512 |
| 25_3381ctg7180001375123_307_SAC   | 36274327 |
| 25_3382ctg7180001520488_372_SAG   | 36276763 |
| 25_3383ctg7180001804695_3909_SCT  | 36278985 |
| 25_3384ctg7180001923608_4682_SCT  | 36390386 |
| 25_3385ctg7180001307068_395_SGT   | 36401273 |
| 25_3386ctg7180001937291_552_SAG   | 36406913 |
| 25_3387ctg7180001937290_956_SAG   | 36410741 |
| 25_3388ctg7180001937290_760_SAC   | 36410937 |
| 25_3389ctg7180001937289_5559_SCT  | 36420720 |
| 25_3390ctg7180001937289_4979_SGT  | 36421300 |
| 25_3391ctg7180001937289_3726_SAG  | 36422553 |

|         |                            |          |
|---------|----------------------------|----------|
| 25_3392 | ctg7180001937288_17583_SAC | 36428073 |
| 25_3393 | ctg7180001764527_596_SCT   | 36556781 |
| 25_3394 | ctg7180001212467_1000_SCT  | 36558829 |
| 25_3395 | ctg7180001212467_4008_SAC  | 36561837 |
| 25_3396 | ctg7180001212467_6125_SAG  | 36563954 |
| 25_3397 | ctg7180001806523_6657_SGT  | 36575172 |
| 25_3398 | ctg7180001293729_272_SAG   | 36606011 |
| 25_3399 | ctg7180001293729_3636_SAG  | 36609269 |
| 25_3400 | ctg7180001838165_746_SCT   | 36624882 |
| 25_3401 | ctg7180001838165_2267_SAC  | 36626450 |
| 25_3402 | ctg7180001715466_1358_SAG  | 36633390 |
| 25_3403 | ctg7180001573410_1656_SAC  | 36652276 |
| 25_3404 | ctg7180001807835_8487_SAC  | 36656876 |
| 25_3405 | ctg7180001599714_1090_SAG  | 36668474 |
| 25_3406 | ctg7180001607206_128_SCT   | 36721777 |
| 25_3407 | ctg7180001825719_397_SAG   | 36733478 |
| 25_3408 | ctg7180001825719_3082_SCT  | 36736163 |
| 25_3409 | ctg7180001930715_5561_SAG  | 36754629 |
| 25_3410 | ctg7180001930715_4383_SAG  | 36755807 |
| 25_3411 | ctg7180001930714_7521_SAG  | 36763488 |
| 25_3412 | ctg7180001930714_2707_SGT  | 36768302 |
| 25_3413 | ctg7180001721688_1665_SGT  | 36780885 |
| 25_3414 | ctg7180001721688_2286_SCT  | 36781506 |
| 25_3415 | ctg7180001721688_2552_SCT  | 36781772 |
| 25_3416 | ctg7180001696623_295_SCT   | 36789875 |
| 25_3417 | ctg7180001650838_980_SCT   | 36812581 |
| 25_3418 | ctg7180001806111_71_SAG    | 36829405 |
| 25_3419 | ctg7180001858753_3939_SGT  | 36904829 |
| 25_3420 | ctg7180001320911_7072_SAC  | 36945600 |
| 25_3421 | ctg7180001819681_1884_SGT  | 36962301 |
| 25_3422 | ctg7180001819681_1896_SAG  | 36962313 |
| 25_3423 | ctg7180001819681_2253_SAC  | 36962670 |
| 25_3424 | ctg7180001525239_656_SCT   | 36979392 |
| 25_3425 | ctg7180001388417_7472_SGT  | 36996346 |
| 25_3426 | ctg7180001388417_129_SAG   | 37003689 |

|         |                           |          |
|---------|---------------------------|----------|
| 25_3427 | ctg7180001439357_1654_SGT | 37139927 |
| 25_3428 | ctg7180001934712_4017_SCT | 37412613 |
| 25_3429 | ctg7180001934712_4362_SCT | 37412958 |
| 25_3430 | ctg7180001706189_3532_SCT | 37492465 |
| 25_3431 | ctg7180001930498_2449_SCT | 37512218 |
| 25_3432 | ctg7180001909991_3884_SAG | 37556315 |
| 25_3433 | ctg7180001895983_2152_SAG | 37629643 |
| 25_3434 | ctg7180001932640_4780_SCT | 37708543 |
| 25_3435 | ctg7180001353466_43_SGT   | 37726448 |
| 25_3436 | ctg7180001866202_6865_SCT | 37830395 |
| 25_3437 | ctg7180001866202_6903_SAG | 37830433 |
| 25_3438 | ctg7180001896928_1065_SCT | 37861829 |
| 25_3439 | ctg7180001896928_2562_SAG | 37863326 |
| 25_3440 | ctg7180001872472_5043_SAG | 37877752 |
| 25_3441 | ctg7180001925328_4264_SCT | 37959549 |
| 25_3442 | ctg7180001815765_5067_SCT | 37969164 |
| 25_3443 | ctg7180001611248_4628_SAC | 37986766 |
| 25_3444 | ctg7180001812093_5207_SAG | 38009333 |
| 25_3445 | ctg7180001807566_5772_SAG | 38075175 |
| 25_3446 | ctg7180001807566_1924_SGT | 38079023 |
| 25_3447 | ctg7180001663648_2145_SGT | 38095088 |
| 25_3448 | ctg7180001663648_1609_SCT | 38095624 |
| 25_3449 | ctg7180001906327_153_SAG  | 38112187 |
| 25_3450 | ctg7180001906327_3334_SCT | 38115368 |
| 25_3451 | ctg7180001906327_3825_SCT | 38115859 |
| 25_3452 | ctg7180001906327_3861_SAC | 38115895 |
| 25_3453 | ctg7180001927394_688_SCT  | 38134248 |
| 25_3454 | ctg7180001927394_537_SAG  | 38134399 |
| 25_3455 | ctg7180001198593_563_SAG  | 38136620 |
| 25_3456 | ctg7180001912953_3694_SAC | 38162140 |
| 25_3457 | ctg7180001912953_2045_SAC | 38163789 |
| 25_3458 | ctg7180001931306_1494_SAC | 38168238 |
| 25_3459 | ctg7180001931306_3187_SGT | 38169931 |
| 25_3460 | ctg7180001638564_2598_SAG | 38263129 |
| 25_3461 | ctg7180001638564_2335_SAG | 38263392 |



|         |                            |          |
|---------|----------------------------|----------|
| 25_3462 | ctg7180001931306_7821_SAC  | 38324251 |
| 25_3463 | ctg7180001797798_4356_SGT  | 38341974 |
| 25_3464 | ctg7180001824716_1912_SAG  | 38351462 |
| 25_3465 | ctg7180001893219_6092_SAG  | 38366648 |
| 25_3466 | ctg7180001928137_1783_SGT  | 38388092 |
| 25_3467 | ctg7180001919430_2034_SGT  | 38404366 |
| 25_3468 | ctg7180001545874_1473_SCT  | 38428117 |
| 25_3469 | ctg7180001545874_143_SCT   | 38429447 |
| 25_3470 | ctg7180001477159_1384_SAC  | 38484454 |
| 25_3471 | ctg7180001493382_283_SAC   | 38568680 |
| 25_3472 | ctg7180001808239_338_SAC   | 38603108 |
| 25_3473 | ctg7180001914491_3042_SAG  | 38630322 |
| 25_3474 | ctg7180001786945_4526_SCT  | 38700671 |
| 25_3475 | ctg7180001888094_7733_SGT  | 38702289 |
| 25_3476 | ctg7180001888094_7481_SGT  | 38702540 |
| 25_3477 | ctg7180001194303_2755_SAG  | 38724812 |
| 25_3478 | ctg7180001799136_6079_SCT  | 38740569 |
| 25_3479 | ctg7180001856618_14144_SGT | 38757909 |
| 25_3480 | ctg7180001811800_9159_SGT  | 38776331 |
| 25_3481 | ctg7180001829102_1110_SAC  | 38790999 |
| 25_3482 | ctg7180001594350_5475_SAG  | 38802784 |
| 25_3483 | ctg7180001921959_4145_SAG  | 38826440 |
| 25_3484 | ctg7180001489762_1111_SAG  | 38834091 |
| 25_3485 | ctg7180001489762_2993_SAC  | 38835973 |
| 25_3486 | ESTNV_35075_2399           | 38879342 |
| 25_3487 | ESTNV_35075_1491           | 38881616 |
| 25_3488 | ctg7180001430596_1883_SAG  | 38927996 |
| 25_3489 | ctg7180001797847_2547_SAG  | 38942993 |
| 25_3490 | ctg7180001317288_8994_SCT  | 38946947 |
| 25_3491 | ctg7180001317288_8799_SAG  | 38947142 |
| 25_3492 | ctg7180001317288_1869_SCT  | 38954072 |
| 25_3493 | ctg7180001317288_464_SAC   | 38955477 |
| 25_3494 | ctg7180001797942_2235_SCT  | 38964253 |
| 25_3495 | ctg7180001790982_2267_SAC  | 38983026 |
| 25_3496 | ctg7180001929120_2599_SAG  | 38992903 |

|         |                            |          |
|---------|----------------------------|----------|
| 25_3497 | ctg7180001929120_2683_SGT  | 38992987 |
| 25_3498 | ctg7180001929120_3152_SAG  | 38993456 |
| 25_3499 | ctg7180001929120_3342_SCT  | 38993646 |
| 25_3500 | ctg7180001929120_3984_SAG  | 38994288 |
| 25_3501 | ctg7180001929120_7422_SAC  | 38997726 |
| 25_3502 | ctg7180001929120_8591_SAC  | 38998895 |
| 25_3503 | ctg7180001373157_928_SAC   | 39014684 |
| 25_3504 | ctg7180001373157_1473_SGT  | 39015229 |
| 25_3505 | ctg7180001909236_8465_SAC  | 39063133 |
| 25_3506 | ctg7180001691013_2136_SCT  | 39097601 |
| 25_3507 | ctg7180001691013_4173_SAC  | 39099850 |
| 25_3508 | ctg7180001877675_7697_SAG  | 39107761 |
| 25_3509 | ctg7180001866903_6237_SAC  | 39155393 |
| 25_3510 | ctg7180001278478_108_SAG   | 39185014 |
| 25_3511 | ctg7180001802356_8460_SAG  | 39193642 |
| 25_3512 | ctg7180001802356_6277_SAC  | 39195825 |
| 25_3513 | ctg7180001806522_179_SCT   | 39216005 |
| 25_3514 | ctg7180001825157_1489_SGT  | 39265012 |
| 25_3515 | ctg7180001871759_1824_SGT  | 39286386 |
| 25_3516 | ctg7180001871759_1370_SCT  | 39286840 |
| 25_3517 | ctg7180001871759_1337_SAC  | 39286873 |
| 25_3518 | ctg7180001836980_9709_SCT  | 39294302 |
| 25_3519 | ctg7180001836980_5122_SAG  | 39298889 |
| 25_3520 | ctg7180001821878_4759_SGT  | 39311560 |
| 25_3521 | ctg7180001850082_922_SCT   | 39347032 |
| 25_3522 | ctg7180001850082_14187_SGT | 39360298 |
| 25_3523 | ctg7180001850082_15838_SGT | 39361949 |
| 25_3524 | ctg7180001850082_15889_SAG | 39362000 |
| 25_3525 | ctg7180001850082_20542_SGT | 39366592 |
| 25_3526 | ctg7180001880876_5821_SAC  | 39384181 |
| 25_3527 | ctg7180001435353_1769_SAG  | 39394104 |
| 25_3528 | ctg7180001251528_5445_SCT  | 39397454 |
| 25_3529 | ctg7180001251528_3866_SAG  | 39399033 |
| 25_3530 | ctg7180001251528_1713_SGT  | 39401186 |
| 25_3531 | ctg7180001251528_1706_SGT  | 39401193 |

|         |                            |          |
|---------|----------------------------|----------|
| 25_3532 | ctg7180001251528_1444_SAC  | 39401455 |
| 25_3533 | ctg7180001880875_3959_SAC  | 39428074 |
| 25_3534 | ctg7180001904006_8303_SAG  | 39444592 |
| 25_3535 | ctg7180001816619_3540_SCT  | 39502200 |
| 25_3536 | ctg7180001914412_7672_SGT  | 39524061 |
| 25_3537 | ctg7180001914412_7846_SAG  | 39524235 |
| 25_3538 | ctg7180001914412_7895_SCT  | 39524284 |
| 25_3539 | ctg7180001914413_2276_SAG  | 39529445 |
| 25_3540 | ctg7180001757141_1558_SCT  | 39577192 |
| 25_3541 | ctg7180001733228_2112_SCT  | 39592553 |
| 25_3542 | ctg7180001733228_1947_SCT  | 39592718 |
| 25_3543 | ctg7180001930525_7053_SAC  | 39601915 |
| 25_3544 | ctg7180001930525_7108_SAC  | 39601970 |
| 25_3545 | ctg7180001930525_16587_SAG | 39611449 |
| 25_3546 | ctg7180001930525_20305_SCT | 39615167 |
| 25_3547 | ctg7180001320700_628_SCT   | 39632090 |
| 25_3548 | ctg7180001320700_69_SCT    | 39632649 |
| 25_3549 | ctg7180001923565_9056_SCT  | 39648501 |
| 25_3550 | ctg7180001923565_16116_SAG | 39655561 |
| 25_3551 | ctg7180001923565_19494_SCT | 39658939 |
| 25_3552 | ctg7180001923565_19814_SGT | 39659259 |
| 25_3553 | ctg7180001923565_24993_SGT | 39664438 |
| 25_3554 | ctg7180001814067_3381_SGT  | 39669797 |
| 25_3555 | ctg7180001814067_4352_SCT  | 39670768 |
| 25_3556 | ctg7180001814067_7250_SAG  | 39673666 |
| 25_3557 | ctg7180001814067_7283_SAG  | 39673699 |
| 25_3558 | ctg7180001814067_7349_SCT  | 39673765 |
| 25_3559 | ctg7180001897293_5388_SCT  | 39692417 |
| 25_3560 | ctg7180001897293_4564_SAC  | 39693241 |
| 25_3561 | ctg7180001795864_5213_SCT  | 39712289 |
| 25_3562 | ctg7180001795864_5736_SAG  | 39712812 |
| 25_3563 | ctg7180001515826_325_SCT   | 39723723 |
| 25_3564 | ctg7180001515826_146_SAG   | 39723902 |
| 25_3565 | ctg7180001489176_1740_SAC  | 39725453 |
| 25_3566 | ctg7180001881277_2935_SAG  | 39729496 |

|                                   |          |
|-----------------------------------|----------|
| 25_3567ctg7180001822899_984_SAC   | 39741105 |
| 25_3568ctg7180001822899_4359_SAG  | 39744443 |
| 25_3569ctg7180001828845_119_SCT   | 39763529 |
| 25_3570ctg7180001868174_13715_SAG | 39809439 |
| 25_3571ctg7180001868174_14185_SAC | 39809909 |
| 25_3572ctg7180001296062_1258_SGT  | 39825721 |
| 25_3573ctg7180001296062_894_SAC   | 39826085 |
| 25_3574ctg7180001896259_3597_SCT  | 39834193 |
| 25_3575ctg7180001801880_1171_SGT  | 39852264 |
| 25_3576ctg7180001801880_5064_SAG  | 39856158 |
| 25_3577ctg7180001488078_1966_SGT  | 39866600 |
| 25_3578ctg7180001488078_3003_SAG  | 39867637 |
| 25_3579ctg7180001794010_7928_SCT  | 39897822 |
| 25_3580ctg7180001426009_4985_SAC  | 39925406 |
| 25_3581ctg7180001426009_5781_SGT  | 39926202 |
| 25_3582ctg7180001871447_11348_SAC | 39943809 |
| 25_3583ctg7180001871447_11924_SCT | 39944385 |
| 25_3584ctg7180001594155_1032_SCT  | 39957821 |
| 25_3585ctg7180001208282_6016_SAC  | 40010722 |
| 25_3586ctg7180001403191_9144_SAG  | 40184710 |
| 25_3587ctg7180001682434_3439_SCT  | 40190533 |
| 25_3588ctg7180001925312_10654_SCT | 40223821 |
| 25_3589ctg7180001925312_10641_SCT | 40223834 |
| 25_3590ctg7180001925312_10450_SAC | 40224025 |
| 25_3591ctg7180001925312_10325_SAC | 40224150 |
| 25_3592ctg7180001925312_6732_SAC  | 40227743 |
| 25_3593ctg7180001841276_1951_SGT  | 40241764 |
| 25_3594ctg7180001841276_1944_SAG  | 40241771 |
| 25_3595ctg7180001920350_7954_SAG  | 40322051 |
| 25_3596ctg7180001638286_1162_SCT  | 40361457 |
| 25_3597ctg7180001813248_4179_SCT  | 40458836 |
| 25_3598ctg7180001813248_3700_SCT  | 40459315 |
| 25_3599ctg7180001902705_5233_SAG  | 40483067 |
| 25_3600ctg7180001902705_6184_SAG  | 40484018 |
| 25_3601ctg7180001853604_245_SAG   | 40507254 |

|                                   |          |
|-----------------------------------|----------|
| 25_3602ctg7180001853604_1349_SAG  | 40508358 |
| 25_3603ctg7180001891636_1837_SCT  | 40528576 |
| 25_3604ctg7180001781568_2070_SCT  | 40541505 |
| 25_3605ctg7180001799429_2412_SAG  | 40563190 |
| 25_3606ctg7180001897418_1684_SCT  | 40607388 |
| 25_3607ctg7180001897418_2415_SAG  | 40608119 |
| 25_3608ctg7180001897419_2421_SGT  | 40620697 |
| 25_3609ctg7180001858930_812_SAG   | 40685711 |
| 25_3610ctg7180001919270_10331_SCT | 40720733 |
| 25_3611ctg7180001804778_4760_SAC  | 40742852 |
| 25_3612ctg7180001905481_20848_SCT | 40780064 |
| 25_3613ctg7180001905481_12249_SAG | 40788663 |
| 25_3614ctg7180001905481_8936_SAG  | 40791976 |
| 25_3615ctg7180001911152_7255_SAG  | 40822472 |
| 25_3616ctg7180001651398_4884_SGT  | 40853880 |
| 25_3617ctg7180001932749_8336_SAG  | 40879110 |
| 25_3618ctg7180001872830_5110_SCT  | 40894071 |
| 25_3619ctg7180001880624_4924_SCT  | 40925196 |
| 25_3620ctg7180001833023_2115_SCT  | 40985092 |
| 25_3621ctg7180001923559_9689_SGT  | 41001300 |
| 25_3622ctg7180001275466_1089_SAC  | 41038984 |
| 25_3623ctg7180001821705_5967_SAG  | 41053276 |
| 25_3624ctg7180001821705_892_SAC   | 41058351 |
| 25_3625ctg7180001247253_959_SGT   | 41087126 |
| 25_3626ctg7180001240845_4025_SCT  | 41106474 |
| 25_3627ctg7180001240845_4238_SGT  | 41106687 |
| 25_3628ctg7180001545165_791_SAC   | 41151131 |
| 25_3629ctg7180001318321_6644_SCT  | 41171273 |
| 25_3630ctg7180001589310_976_SGT   | 41206293 |
| 25_3631ctg7180001870874_1322_SGT  | 41286409 |
| 25_3632ctg7180001873646_2227_SGT  | 41319145 |
| 25_3633ctg7180001850299_7142_SCT  | 41325051 |
| 25_3634ctg7180001850299_7079_SAG  | 41325114 |
| 25_3635ctg7180001850299_5120_SCT  | 41327073 |
| 25_3636ctg7180001850299_5076_SCT  | 41327117 |

|                                   |          |
|-----------------------------------|----------|
| 25_3637ctg7180001850299_4566_SGT  | 41327627 |
| 25_3638ctg7180001872178_2728_SGT  | 41415375 |
| 25_3639ctg7180001872178_1562_SCT  | 41416541 |
| 25_3640ctg7180001884283_4242_SGT  | 41424187 |
| 25_3641ctg7180001907756_1586_SAG  | 41440003 |
| 25_3642ctg7180001835189_2287_SAC  | 41465129 |
| 25_3643ctg7180001254234_1712_SAG  | 41485603 |
| 25_3644ctg7180001875289_5437_SCT  | 41493804 |
| 25_3645ctg7180001875290_172_SAC   | 41497739 |
| 25_3646ctg7180001306227_153_SAC   | 41543893 |
| 25_3647ctg7180001642110_2474_SCT  | 41573368 |
| 25_3648ctg7180001327405_1208_SCT  | 41581174 |
| 25_3649ctg7180001696701_890_SGT   | 41657095 |
| 25_3650ctg7180001568745_57_SAG    | 41665699 |
| 25_3651ctg7180001596671_1701_SCT  | 41692328 |
| 25_3652ctg7180001352449_592_SAC   | 41712442 |
| 25_3653ctg7180001471130_6094_SGT  | 41722421 |
| 25_3654ctg7180001342354_1779_SCT  | 41735509 |
| 25_3655ctg7180001826029_2717_SAG  | 41740687 |
| 25_3656ctg7180001826029_3256_SCT  | 41741226 |
| 25_3657ctg7180001826029_4235_SAG  | 41742205 |
| 25_3658ctg7180001826029_5000_SCT  | 41742970 |
| 25_3659ctg7180001826029_10984_SGT | 41748954 |
| 25_3660ctg7180001656076_6249_SGT  | 41775109 |
| 25_3661ctg7180001876905_16212_SAG | 41820629 |
| 25_3662ctg7180001935544_15997_SCT | 41852437 |
| 25_3663ctg7180001935544_11892_SAC | 41856542 |
| 25_3664ctg7180001620626_8398_SAC  | 41895194 |
| 25_3665ctg7180001812941_2831_SGT  | 41937602 |
| 25_3666ctg7180001867454_11336_SAC | 41950208 |
| 25_3667ctg7180001856031_1360_SAG  | 41970334 |
| 25_3668ctg7180001856031_2233_SCT  | 41971171 |
| 25_3669ctg7180001902401_1458_SCT  | 41976666 |
| 25_3670ctg7180001841217_6231_SCT  | 41996702 |
| 25_3671ctg7180001799947_7339_SAG  | 42209217 |

|         |                            |          |
|---------|----------------------------|----------|
| 25_3672 | ctg7180001500755_561_SAC   | 42217259 |
| 25_3673 | ctg7180001739963_199_SGT   | 42220494 |
| 25_3674 | ctg7180001897158_2075_SAG  | 42237600 |
| 25_3675 | ctg7180001609406_4203_SCT  | 42277707 |
| 25_3676 | ctg7180001609406_3965_SAC  | 42277945 |
| 25_3677 | ctg7180001609406_3244_SAG  | 42278666 |
| 25_3678 | ctg7180001929658_8998_SGT  | 42301362 |
| 25_3679 | ctg7180001929658_10448_SAG | 42302812 |
| 25_3680 | ctg7180001929658_12842_SAG | 42305206 |
| 25_3681 | ctg7180001819946_4375_SCT  | 42312385 |
| 25_3682 | ctg7180001286348_1764_SCT  | 42361504 |
| 25_3683 | ctg7180001240142_1942_SAG  | 42380131 |
| 25_3684 | ctg7180001240142_2450_SGT  | 42380604 |
| 25_3685 | ctg7180001931392_1596_SGT  | 42387697 |
| 25_3686 | ctg7180001805727_7788_SAC  | 42443870 |
| 25_3687 | ctg7180001696277_10111_SCT | 42482405 |
| 25_3688 | ctg7180001696277_10303_SAG | 42482597 |
| 25_3689 | ctg7180001871904_8023_SAG  | 42525971 |
| 25_3690 | ctg7180001726564_4001_SAG  | 42547888 |
| 25_3691 | ctg7180001654764_1375_SGT  | 42556175 |
| 25_3692 | ctg7180001654764_981_SCT   | 42556569 |
| 25_3693 | ctg7180001850459_3700_SCT  | 42565854 |
| 25_3694 | ctg7180001850459_5900_SAG  | 42568053 |
| 25_3695 | ctg7180001773466_993_SAG   | 42598278 |
| 25_3696 | ctg7180001773466_1135_SAG  | 42598420 |
| 25_3697 | ctg7180001912641_218_SAG   | 42601820 |
| 25_3698 | ctg7180001912641_2690_SCT  | 42604292 |
| 25_3699 | ctg7180001912641_2881_SGT  | 42604483 |
| 25_3700 | ctg7180001912641_2976_SAC  | 42604578 |
| 25_3701 | ctg7180001879326_9740_SGT  | 42625163 |
| 25_3702 | ctg7180001879326_9498_SGT  | 42625405 |
| 25_3703 | ctg7180001515882_5961_SAG  | 42647526 |
| 25_3704 | ctg7180001797588_1455_SAC  | 42673865 |
| 25_3705 | ctg7180001797588_712_SAC   | 42674608 |
| 25_3706 | ctg7180001797588_49_SGT    | 42675271 |

|                                   |          |
|-----------------------------------|----------|
| 25_3707ctg7180001578987_1479_SAG  | 42683877 |
| 25_3708ctg7180001836276_5084_SAG  | 42693544 |
| 25_3709ctg7180001836276_6423_SCT  | 42694883 |
| 25_3710ctg7180001836276_6536_SAG  | 42694996 |
| 25_3711ctg7180001853248_1848_SAG  | 42706392 |
| 25_3712ctg7180001868826_1179_SAC  | 42719115 |
| 25_3713ctg7180001868826_1254_SAC  | 42720608 |
| 25_3714ctg7180001401372_970_SAG   | 42723688 |
| 25_3715ctg7180001401372_1132_SCT  | 42723850 |
| 25_3716ctg7180001788005_4822_SAC  | 42815340 |
| 25_3717ctg7180001450836_1070_SGT  | 42892406 |
| 25_3718ctg7180001784652_3824_SAC  | 42921201 |
| 25_3719ctg7180001740045_1424_SCT  | 42945895 |
| 25_3720ctg7180001233515_8417_SCT  | 42952436 |
| 25_3721ctg7180001233515_7328_SAG  | 42953525 |
| 25_3722ctg7180001233515_7168_SCT  | 42953685 |
| 25_3723ctg7180001233515_4431_SAG  | 42956422 |
| 25_3724ctg7180001538255_551_SAC   | 43047414 |
| 25_3725ctg7180001824035_6369_SCT  | 43050074 |
| 25_3726ctg7180001336314_1109_SAG  | 43072907 |
| 25_3727ctg7180001553506_246_SAG   | 43079895 |
| 25_3728ctg7180001796379_8739_SGT  | 43124980 |
| 25_3729ctg7180001808073_3948_SAC  | 43158227 |
| 25_3730ctg7180001336310_2006_SCT  | 43167371 |
| 25_3731ctg7180001336310_2384_SGT  | 43167784 |
| 25_3732ctg7180001491895_1989_SCT  | 43192936 |
| 25_3733ctg7180001608778_1966_SAC  | 43195490 |
| 25_3734ctg7180001351933_1569_SAC  | 43204623 |
| 25_3735ctg7180001351933_1648_SAG  | 43204702 |
| 25_3736ctg7180001351933_2444_SAC  | 43205498 |
| 25_3737ctg7180001351933_2717_SAG  | 43205771 |
| 25_3738ctg7180001908277_8211_SCT  | 43221605 |
| 25_3739ctg7180001908277_12454_SGT | 43225848 |
| 25_3740ctg7180001908277_12682_SAC | 43226076 |
| 25_3741ctg7180001908277_16874_SAG | 43230268 |



|         |                            |          |
|---------|----------------------------|----------|
| 25_3742 | ctg7180001908277_18503_SCT | 43231888 |
| 25_3743 | ctg7180001908277_18805_SGT | 43232190 |
| 25_3744 | ctg7180001908277_18964_SGT | 43232349 |
| 25_3745 | ctg7180001908277_20222_SCT | 43233607 |
| 25_3746 | ctg7180001843602_1101_SCT  | 43260396 |
| 25_3747 | ctg7180001883143_3121_SAG  | 43276534 |
| 25_3748 | ctg7180001693530_1923_SCT  | 43278615 |
| 25_3749 | ctg7180001693530_2807_SGT  | 43279499 |
| 25_3750 | ctg7180001425622_278_SGT   | 43286432 |
| 25_3751 | ctg7180001432015_488_SAG   | 43289649 |
| 25_3752 | ctg7180001692307_5823_SAC  | 43341709 |
| 25_3753 | ctg7180001427839_1398_SAG  | 43373203 |
| 25_3754 | ctg7180001427839_1616_SGT  | 43373421 |
| 25_3755 | ctg7180001889616_5095_SAG  | 43413016 |
| 25_3756 | ctg7180001860070_2960_SAC  | 43425570 |
| 25_3757 | ctg7180001860070_2330_SAC  | 43426198 |
| 25_3758 | ctg7180001930377_6537_SCT  | 43436889 |
| 25_3759 | ctg7180001930377_13521_SAG | 43443873 |
| 25_3760 | ctg7180001930377_14766_SAG | 43445118 |
| 25_3761 | ctg7180001852725_3123_SAC  | 43456940 |
| 25_3762 | ctg7180001813999_3647_SAG  | 43472299 |
| 25_3763 | ctg7180001520493_200       | 43474015 |
| 25_3764 | ctg7180001520493_1122_SCT  | 43479465 |
| 25_3765 | ctg7180001520493_924_SCT   | 43479663 |
| 25_3766 | ctg7180001231556_1466_SAG  | 43483729 |
| 25_3767 | ctg7180001894549_948_SAG   | 43500819 |
| 25_3768 | ctg7180001894549_3007_SAG  | 43502913 |
| 25_3769 | ctg7180001894549_3124_SGT  | 43502995 |
| 25_3770 | ctg7180001888237_1542_SAG  | 43506033 |
| 25_3771 | ctg7180001707543_7969_SGT  | 43518218 |
| 25_3772 | ctg7180001463430_1296_SAC  | 43526533 |
| 25_3773 | ctg7180001696778_2762_SCT  | 43529917 |
| 25_3774 | ctg7180001696778_2752_SCT  | 43529927 |
| 25_3775 | ctg7180001696778_1385_SGT  | 43531294 |
| 25_3776 | ctg7180001804953_6991_SAC  | 43536974 |

|         |                            |          |
|---------|----------------------------|----------|
| 25_3777 | ctg7180001804953_6700_SAC  | 43537265 |
| 25_3778 | ctg7180001804953_740_SAG   | 43543171 |
| 25_3779 | ctg7180001919151_4221_SGT  | 43560058 |
| 25_3780 | ctg7180001919151_1820_SAC  | 43562459 |
| 25_3781 | ctg7180001919151_711_SCT   | 43563568 |
| 25_3782 | ctg7180001358007_2364_SAG  | 43574154 |
| 25_3783 | ctg7180001358007_679_SCT   | 43575839 |
| 25_3784 | ctg7180001593404_1147_SCT  | 43594225 |
| 25_3785 | ctg7180001863775_5130_SAG  | 43600726 |
| 25_3786 | ctg7180001863775_7925_SCT  | 43603522 |
| 25_3787 | ctg7180001478419_693_SAC   | 43608320 |
| 25_3788 | ctg7180001855273_7371_SAG  | 43701502 |
| 25_3789 | ctg7180001855273_5156_SAG  | 43704627 |
| 25_3790 | ctg7180001850582_4700_SCT  | 43737890 |
| 25_3791 | ctg7180001850582_4762_SAC  | 43737952 |
| 25_3792 | ctg7180001915846_5740_SGT  | 43755945 |
| 25_3793 | ctg7180001783416_1513_SAG  | 43762302 |
| 25_3794 | ctg7180001783416_1312_SCT  | 43762503 |
| 25_3795 | ctg7180001783416_211_SAG   | 43763604 |
| 25_3796 | ctg7180001810851_4190_SCT  | 43795007 |
| 25_3797 | ctg7180001810851_4664_SCT  | 43795481 |
| 25_3798 | ctg7180001810851_4812_SAC  | 43795629 |
| 25_3799 | ctg7180001810851_5321_SGT  | 43796138 |
| 25_3800 | ctg7180001810851_5465_SAG  | 43796282 |
| 25_3801 | ctg7180001810851_5600_SGT  | 43796417 |
| 25_3802 | ctg7180001835087_15459_SAG | 43820803 |
| 25_3803 | ctg7180001835087_16838_SCT | 43822182 |
| 25_3804 | ctg7180001835087_20319_SGT | 43825663 |
| 25_3805 | ctg7180001352971_3941_SAG  | 43842782 |
| 25_3806 | ctg7180001352971_1862_SAG  | 43844861 |
| 25_3807 | ctg7180001794549_1606_SGT  | 43857493 |
| 25_3808 | ctg7180001915705_8467_SGT  | 43931416 |
| 25_3809 | ctg7180001557868_115_SAG   | 43940856 |
| 25_3810 | ctg7180001295015_2729_SCT  | 43985496 |
| 25_3811 | ctg7180001295015_2180_SCT  | 43986045 |

|         |                            |          |
|---------|----------------------------|----------|
| 25_3812 | ctg7180001439131_1750_SCT  | 44012509 |
| 25_3813 | ctg7180001439131_2077_SGT  | 44012836 |
| 25_3814 | ctg7180001826020_3843_SCT  | 44054975 |
| 25_3815 | ctg7180001826020_13310_SCT | 44064442 |
| 25_3816 | ctg7180001569088_942_SAC   | 44099574 |
| 25_3817 | ctg7180001691820_3284_SAG  | 44228853 |
| 25_3818 | ctg7180001458584_1304_SCT  | 44234375 |
| 25_3819 | ctg7180001499576_1224_SGT  | 44271568 |
| 25_3820 | ctg7180001626292_1520_SAG  | 44278108 |
| 25_3821 | ctg7180001605858_1387_SAG  | 44296472 |
| 25_3822 | ctg7180001271079_4684_SAG  | 44309552 |
| 25_3823 | ctg7180001797990_4902_SAG  | 44426070 |
| 25_3824 | ctg7180001748718_1051_SGT  | 44427192 |
| 25_3825 | ctg7180001818321_3341_SAG  | 44435750 |
| 25_3826 | ctg7180001266183_1852_SGT  | 44450943 |
| 25_3827 | ctg7180001491589_2156_SAC  | 44476474 |
| 25_3828 | ctg7180001703092_946_SAG   | 44494153 |
| 25_3829 | ctg7180001703092_910_SCT   | 44494189 |
| 25_3830 | ctg7180001794026_2249_SAG  | 44512073 |
| 25_3831 | ctg7180001795145_5835_SCT  | 44544881 |
| 25_3832 | ctg7180001930194_10805_SGT | 44580831 |
| 25_3833 | ctg7180001593900_1570_SCT  | 44595220 |
| 25_3834 | ctg7180001222093_767_SCT   | 44617688 |
| 25_3835 | ctg7180001932490_1923_SAG  | 44748906 |
| 25_3836 | ctg7180001823664_4028_SAC  | 44759420 |
| 25_3837 | ctg7180001872208_6542_SCT  | 44797952 |
| 25_3838 | ctg7180001594003_97_SAG    | 44803594 |
| 25_3839 | ctg7180001803278_514_SCT   | 44870888 |
| 25_3840 | ctg7180001807475_2946_SAC  | 44918052 |
| 25_3841 | ctg7180001807475_3507_SCT  | 44918613 |
| 25_3842 | ctg7180001217047_123_SCT   | 44937905 |
| 25_3843 | ctg7180001863577_454_SAG   | 44953455 |
| 25_3844 | ctg7180001863577_361_SAG   | 44953548 |
| 25_3845 | ctg7180001791271_5157_SCT  | 44960029 |
| 25_3846 | ctg7180001902060_7697_SAC  | 45018529 |

|                                   |          |
|-----------------------------------|----------|
| 25_3847ctg7180001653430_999_SAG   | 45024575 |
| 25_3848ctg7180001800907_81_SGT    | 45084534 |
| 25_3849ctg7180001910701_7414_SAG  | 45092422 |
| 25_3850ctg7180001920546_4771_SCT  | 45108215 |
| 25_3851ctg7180001920546_6024_SCT  | 45109468 |
| 25_3852ctg7180001920546_6758_SAG  | 45110202 |
| 25_3853ctg7180001710343_214_SAG   | 45130885 |
| 25_3854ctg7180001226839_1082_SAG  | 45138380 |
| 25_3855ctg7180001866719_1068_SAG  | 45158912 |
| 25_3856ctg7180001566902_345_SAG   | 45160744 |
| 25_3857ctg7180001383469_1162_SAG  | 45162887 |
| 25_3858ctg7180001932718_5944_SGT  | 45172092 |
| 25_3859ctg7180001932718_5266_SGT  | 45172404 |
| 25_3860ctg7180001932718_5100_SAG  | 45172570 |
| 25_3861ctg7180001932718_4995_SCT  | 45172675 |
| 25_3862ctg7180001932718_4971_SAC  | 45172699 |
| 25_3863ctg7180001932718_2925_SAG  | 45174745 |
| 25_3864ctg7180001932718_1866_SAG  | 45175705 |
| 25_3865ctg7180001557995_284_SGT   | 45177835 |
| 25_3866ctg7180001557995_349_SAG   | 45177900 |
| 25_3867ctg7180001786677_14248_SCT | 45205593 |
| 25_3868ctg7180001786677_10893_SCT | 45208948 |
| 25_3869ctg7180001786677_7794_SAG  | 45212047 |
| 25_3870ctg7180001786676_1876_SGT  | 45220835 |
| 25_3871ctg7180001786676_532_SAC   | 45222179 |
| 25_3872ctg7180001795427_569_SAG   | 45227148 |
| 25_3873ctg7180001273465_191_SAG   | 45231673 |
| 25_3874ctg7180001273465_94_SAG    | 45231770 |
| 25_3875ctg7180001835519_282_SAG   | 45238291 |
| 25_3876ctg7180001835519_4567_SGT  | 45242576 |
| 25_3877ctg7180001469733_2114_SAG  | 45251429 |
| 25_3878ctg7180001830665_1953_SCT  | 45289134 |
| 25_3879ctg7180001830665_1840_SAC  | 45289247 |
| 25_3880ctg7180001242649_849_SCT   | 45299869 |
| 25_3881ctg7180001931998_8169_SAG  | 45303455 |

|         |                            |          |
|---------|----------------------------|----------|
| 25_3882 | ctg7180001931998_7885_SAC  | 45303739 |
| 25_3883 | ctg7180001828728_4787_SAC  | 45317626 |
| 25_3884 | ctg7180001833618_3495_SGT  | 45326608 |
| 25_3885 | ctg7180001807318_4273_SAG  | 45347549 |
| 25_3886 | ctg7180001807318_2793_SAC  | 45349029 |
| 25_3887 | ctg7180001864616_1043_SCT  | 45383917 |
| 25_3888 | ctg7180001881262_3020_SCT  | 45403136 |
| 25_3889 | ctg7180001804882_3646_SAC  | 45415923 |
| 25_3890 | ctg7180001804882_2181_SAG  | 45417528 |
| 25_3891 | ctg7180001804882_140_SAG   | 45419569 |
| 25_3892 | ctg7180001906402_9230_SGT  | 45457058 |
| 25_3893 | ctg7180001906402_12896_SCT | 45460724 |
| 25_3894 | ctg7180001636845_879_SCT   | 45546790 |
| 25_3895 | ctg7180001531947_2204_SAG  | 45551455 |
| 25_3896 | ctg7180001531947_1738_SGT  | 45551921 |
| 25_3897 | ctg7180001210639_1152_SAG  | 45590974 |
| 25_3898 | ctg7180001511071_536_SAG   | 45653797 |
| 25_3899 | ctg7180001511071_528_SCT   | 45653805 |
| 25_3900 | ctg7180001832026_190_SCT   | 45654557 |
| 25_3901 | GCR_cBin33290_Ctg1_231     | 45658966 |
| 25_3902 | ctg7180001864573_1144_SAC  | 45672582 |
| 25_3903 | ctg7180001507154_567_SGT   | 45703183 |
| 25_3904 | ctg7180001625587_1560_SAC  | 45711857 |
| 25_3905 | ctg7180001625587_2240_SGT  | 45712537 |
| 25_3906 | ctg7180001625587_2310_SAG  | 45712607 |
| 25_3907 | ctg7180001625587_2562_SAG  | 45712859 |
| 25_3908 | ctg7180001820378_7615_SGT  | 45717943 |
| 25_3909 | ctg7180001820378_5715_SCT  | 45720206 |
| 25_3910 | ctg7180001820378_3890_SAG  | 45722031 |
| 25_3911 | ctg7180001820378_3669_SAG  | 45722252 |
| 25_3912 | ctg7180001820378_3316_SAG  | 45722605 |
| 25_3913 | ctg7180001820378_2496_SGT  | 45723425 |
| 25_3914 | ctg7180001817424_2064_SCT  | 45726582 |
| 25_3915 | ctg7180001917641_1376_SAG  | 45735491 |
| 25_3916 | ctg7180001874082_5542_SCT  | 45762224 |

|         |                            |          |
|---------|----------------------------|----------|
| 25_3917 | ctg7180001874082_5064_SAG  | 45762702 |
| 25_3918 | ctg7180001874082_1241_SAC  | 45766525 |
| 25_3919 | ctg7180001338679_690_SGT   | 45803731 |
| 25_3920 | ctg7180001338679_604_SCT   | 45803817 |
| 25_3921 | ctg7180001290344_743_SCT   | 45805659 |
| 25_3922 | ctg7180001290344_819_SGT   | 45805735 |
| 25_3923 | ctg7180001290344_1137_SGT  | 45806053 |
| 25_3924 | ctg7180001912023_6766_SCT  | 45814819 |
| 25_3925 | ctg7180001605481_1437_SGT  | 45848581 |
| 25_3926 | ctg7180001859373_1448_SGT  | 45905427 |
| 25_3927 | ctg7180001859373_1378_SAC  | 45905497 |
| 25_3928 | ctg7180001344465_1116_SAC  | 45908988 |
| 25_3929 | ctg7180001885099_11372_SAG | 45914897 |
| 25_3930 | ctg7180001885099_10950_SGT | 45915319 |
| 25_3931 | ctg7180001885099_10656_SAG | 45915613 |
| 25_3932 | ctg7180001885099_5645_SGT  | 45920624 |
| 25_3933 | ctg7180001373892_523_SAG   | 45946280 |
| 25_3934 | ctg7180001800385_2330_SAC  | 45953124 |
| 25_3935 | ctg7180001859290_5392_SCT  | 45963226 |
| 25_3936 | ctg7180001873919_15292_SCT | 45984811 |
| 25_3937 | ctg7180001873919_16710_SAG | 45986229 |
| 25_3938 | ctg7180001873919_19426_SAC | 45988584 |
| 25_3939 | ctg7180001873919_19853_SCT | 45989011 |
| 25_3940 | ctg7180001677004_346_SCT   | 46001007 |
| 25_3941 | ctg7180001921387_13849_SAC | 46015011 |
| 25_3942 | ctg7180001921387_19184_SCT | 46023801 |
| 25_3943 | ctg7180001921387_20257_SGT | 46024874 |
| 25_3944 | ctg7180001921387_25833_SAC | 46030450 |
| 25_3945 | ctg7180001921387_26261_SCT | 46031087 |
| 25_3946 | ctg7180001921387_27296_SAG | 46032122 |
| 25_3947 | ctg7180001611913_279_SCT   | 46059824 |
| 25_3948 | ctg7180001815098_1511_SAC  | 46068509 |
| 25_3949 | ctg7180001815098_15482_SAC | 46082480 |
| 25_3950 | ctg7180001815098_15692_SCT | 46082690 |
| 25_3951 | ctg7180001815098_16862_SAG | 46083860 |

|                                   |          |
|-----------------------------------|----------|
| 25_3952ctg7180001816567_606_SAG   | 46089714 |
| 25_3953ctg7180001659051_1259_SAG  | 46106875 |
| 25_3954ctg7180001659082_51_SAG    | 46109267 |
| 25_3955ctg7180001377232_1396_SCT  | 46127467 |
| 25_3956ctg7180001476285_5756_SAG  | 46141238 |
| 25_3957ctg7180001837002_8727_SCT  | 46162754 |
| 25_3958ctg7180001837002_6631_SAC  | 46164849 |
| 25_3959ctg7180001837002_6010_SAC  | 46165470 |
| 25_3960ctg7180001838839_1722_SAC  | 46278710 |
| 25_3961ctg7180001838839_1858_SAG  | 46278846 |
| 25_3962ctg7180001838839_1995_SCT  | 46278983 |
| 25_3963ctg7180001905612_2912_SAC  | 46316295 |
| 25_3964ctg7180001804873_3040_SAG  | 46363906 |
| 25_3965ctg7180001856452_8840_SAC  | 46427195 |
| 25_3966ctg7180001868898_5995_SAC  | 46466534 |
| 25_3967ctg7180001902652_12606_SAC | 46493997 |
| 25_3968ctg7180001896899_4452_SCT  | 46633989 |
| 25_3969ctg7180001695843_2129_SAG  | 46641526 |
| 25_3970ctg7180001872779_10369_SGT | 46667468 |
| 25_3971ctg7180001872779_8765_SAG  | 46669072 |
| 25_3972ctg7180001857011_10580_SGT | 46683375 |
| 25_3973ctg7180001522043_1607_SGT  | 46709044 |
| 25_3974ctg7180001903013_195_SAG   | 46788218 |
| 25_3975ctg7180001555365_700_SAG   | 46899326 |
| 25_3976ctg7180001862096_6664_SAC  | 46938944 |
| 25_3977ctg7180001884823_1256_SAC  | 46945117 |
| 25_3978ctg7180001289516_1491_SCT  | 46960320 |
| 25_3979ctg7180001831177_10555_SAG | 46993832 |
| 25_3980ctg7180001820515_6114_SCT  | 47015810 |
| 25_3981ctg7180001820515_781_SCT   | 47021143 |
| 25_3982ctg7180001800894_11262_SCT | 47057550 |
| 25_3983ctg7180001827948_2173_SAG  | 47106498 |
| 25_3984ctg7180001803475_718_SCT   | 47131498 |
| 25_3985ctg7180001803476_527_SGT   | 47140901 |
| 25_3986ctg7180001927070_3681_SAG  | 47219643 |

|         |                            |          |
|---------|----------------------------|----------|
| 25_3987 | ctg7180001927071_15737_SCT | 47239847 |
| 25_3988 | ctg7180001900949_5066_SAG  | 47316990 |
| 25_3989 | ctg7180001900951_1499_SCT  | 47344628 |
| 25_3990 | ctg7180001900951_4417_SCT  | 47347267 |
| 25_3991 | ctg7180001804843_357_SAC   | 47366300 |
| 25_3992 | ctg7180001548284_512_SAC   | 47388827 |
| 25_3993 | ctg7180001876994_10088_SAG | 47408456 |
| 25_3994 | ctg7180001876994_8266_SAG  | 47410278 |
| 25_3995 | ctg7180001798113_1637_SAG  | 47449414 |
| 25_3996 | ctg7180001798113_7942_SGT  | 47455716 |
| 25_3997 | ctg7180001847992_5063_SAG  | 47479990 |
| 25_3998 | ctg7180001542577_921_SAG   | 47514079 |
| 25_3999 | ctg7180001896686_3281_SAG  | 47565013 |
| 25_4000 | ctg7180001929944_9248_SGT  | 47571595 |
| 25_4001 | ctg7180001879178_3430_SAG  | 47589667 |
| 25_4002 | ctg7180001879178_3466_SAG  | 47589703 |
| 25_4003 | ctg7180001879178_5555_SCT  | 47591792 |
| 25_4004 | ctg7180001879178_6702_SGT  | 47592939 |
| 25_4005 | ctg7180001796110_2919_SGT  | 47620553 |
| 25_4006 | ctg7180001814628_1587_SAG  | 47687058 |
| 25_4007 | ctg7180001814628_1040_SCT  | 47687605 |
| 25_4008 | ctg7180001814628_879_SAG   | 47687766 |
| 25_4009 | ctg7180001274958_340_SAG   | 47742491 |
| 25_4010 | ctg7180001683243_879_SCT   | 47753438 |
| 25_4011 | ctg7180001683243_1130_SAG  | 47753689 |
| 25_4012 | ctg7180001683243_1274_SCT  | 47753833 |
| 25_4013 | ctg7180001898454_8737_SAG  | 47783212 |
| 25_4014 | ctg7180001926259_8222_SAG  | 47796213 |
| 25_4015 | ctg7180001834024_2117_SAG  | 47819167 |
| 25_4016 | ctg7180001834024_3005_SCT  | 47820294 |
| 25_4017 | ctg7180001837343_2117_SCT  | 47847958 |
| 25_4018 | ctg7180001837343_1138_SGT  | 47848937 |
| 25_4019 | ctg7180001837343_1005_SCT  | 47849070 |
| 25_4020 | ctg7180001906082_3253_SAG  | 47863722 |
| 25_4021 | ctg7180001934857_1497_SAC  | 47898653 |



|                                    |          |
|------------------------------------|----------|
| 25_4022 ctg7180001281887_344_SGT   | 47927180 |
| 25_4023 ctg7180001281887_635_SGT   | 47927471 |
| 25_4024 ctg7180001557269_358_SAC   | 47938952 |
| 25_4025 ctg7180001557269_636_SCT   | 47939230 |
| 25_4026 ctg7180001557269_639_SAG   | 47939233 |
| 25_4027 ctg7180001218407_2858_SAG  | 47951465 |
| 25_4028 ctg7180001218407_3133_SCT  | 47951740 |
| 25_4029 ctg7180001936474_3894_SGT  | 47955856 |
| 25_4030 ctg7180001428309_626_SAC   | 47971904 |
| 25_4031 ctg7180001821429_1432_SCT  | 47978691 |
| 25_4032 ctg7180001821429_1594_SGT  | 47978853 |
| 25_4033 ctg7180001821429_4467_SAG  | 47981726 |
| 25_4034 ctg7180001880109_855_SAG   | 47992790 |
| 25_4035 ctg7180001880109_1129_SCT  | 47993064 |
| 25_4036 ctg7180001889357_1493_SAG  | 48011162 |
| 25_4037 ctg7180001889357_1782_SAG  | 48011451 |
| 25_4038 ctg7180001889357_2309_SGT  | 48011978 |
| 25_4039 ctg7180001884800_3113_SAC  | 48055539 |
| 25_4040 ctg7180001933090_7619_SAG  | 48070507 |
| 25_4041 ctg7180001911153_6813_SAG  | 48109987 |
| 25_4042 ctg7180001929107_3654_SAG  | 48119288 |
| 25_4043 ctg7180001929107_3823_SCT  | 48119457 |
| 25_4044 ctg7180001929107_5129_SCT  | 48120763 |
| 25_4045 ctg7180001789397_2856_SCT  | 48158993 |
| 25_4046 ctg7180001789397_739_SAC   | 48161367 |
| 25_4047 ctg7180001926452_9216_SAG  | 48165821 |
| 25_4048 ctg7180001848176_10854_SAG | 48207997 |
| 25_4049 ctg7180001848176_11355_SAC | 48208498 |
| 25_4050 ctg7180001848176_14848_SAG | 48211991 |
| 25_4051 ctg7180001848176_15474_SCT | 48212617 |
| 25_4052 ctg7180001821557_3212_SCT  | 48216525 |
| 25_4053 ctg7180001828941_531_SGT   | 48218754 |
| 25_4054 ctg7180001828941_2486_SAC  | 48220709 |
| 25_4055 ctg7180001911153_8859_SAC  | 48239651 |
| 25_4056 ctg7180001935672_99_SCT    | 48260597 |

|                                   |          |
|-----------------------------------|----------|
| 25_4057ctg7180001935672_2364_SCT  | 48262862 |
| 25_4058ctg7180001935672_6901_SAC  | 48267433 |
| 25_4059ctg7180001935672_7761_SAG  | 48268109 |
| 25_4060ctg7180001935672_8590_SAC  | 48268938 |
| 25_4061ctg7180001935672_9507_SAG  | 48269856 |
| 25_4062ctg7180001925244_3881_SCT  | 48329876 |
| 25_4063ctg7180001903278_7952_SAC  | 48370076 |
| 25_4064ctg7180001903278_8656_SAG  | 48370780 |
| 25_4065ctg7180001571150_1260_SAC  | 48390617 |
| 25_4066ctg7180001897585_12510_SGT | 48391932 |
| 25_4067ctg7180001897585_6036_SAC  | 48398406 |
| 25_4068ctg7180001897585_5632_SAG  | 48398810 |
| 25_4069ctg7180001897585_5558_SAG  | 48398884 |
| 25_4070ctg7180001805087_10243_SGT | 48423056 |
| 25_4071ctg7180001805087_10152_SGT | 48423147 |
| 25_4072ctg7180001805087_10098_SAC | 48423201 |
| 25_4073ctg7180001805087_5731_SCT  | 48427568 |
| 25_4074ctg7180001866595_4403_SCT  | 48470837 |
| 25_4075ctg7180001866595_1774_SAG  | 48473466 |
| 25_4076ctg7180001866595_1610_SCT  | 48473630 |
| 25_4077ctg7180001831774_8277_SGT  | 48494305 |
| 25_4078ctg7180001920138_1781_SGT  | 48508296 |
| 25_4079ctg7180001932904_246_SCT   | 48520114 |
| 25_4080ctg7180001826421_6469_SAG  | 48531819 |
| 25_4081ctg7180001831776_2166_SAG  | 48541196 |
| 25_4082ctg7180001250564_447_SCT   | 48576350 |
| 25_4083ctg7180001190430_644_SAG   | 48577411 |
| 25_4084ctg7180001190430_1597_SCT  | 48578364 |
| 25_4085ctg7180001190430_2109_SAC  | 48578876 |
| 25_4086ctg7180001724564_1287_SAC  | 48583305 |
| 25_4087ctg7180001724564_999_SCT   | 48583593 |
| 25_4088ctg7180001724564_913_SAG   | 48583679 |
| 25_4089ctg7180001808294_60_SGT    | 48611937 |
| 25_4090ctg7180001669420_2227_SAC  | 48701892 |
| 25_4091ctg7180001858702_4466_SAG  | 48756341 |

|                                   |          |
|-----------------------------------|----------|
| 25_4092ctg7180001934498_6284_SGT  | 48767123 |
| 25_4093ctg7180001503621_1427_SAG  | 48799110 |
| 25_4094ctg7180001824958_164_SCT   | 48811321 |
| 25_4095ctg7180001824958_211_SCT   | 48811368 |
| 25_4096ctg7180001931435_11163_SAG | 48834017 |
| 25_4097ctg7180001822193_4306_SGT  | 48871255 |
| 25_4098ctg7180001828332_1568_SAC  | 48901613 |
| 25_4099ctg7180001929991_4587_SGT  | 48915286 |
| 25_4100ctg7180001929991_2627_SAG  | 48917246 |
| 25_4101ctg7180001934616_1269_SCT  | 48959285 |
| 25_4102ctg7180001823536_3031_SAC  | 49007619 |
| 25_4103ctg7180001823536_2888_SAC  | 49007762 |
| 25_4104ctg7180001485330_1017_SCT  | 49013919 |
| 25_4105ctg7180001685596_1323_SAG  | 49022393 |
| 25_4106ctg7180001911228_5661_SAG  | 49084843 |
| 25_4107ctg7180001250508_1011_SAC  | 49099068 |
| 25_4108ctg7180001296149_1291_SGT  | 49188267 |
| 25_4109ctg7180001368370_1892_SAC  | 49195880 |
| 25_4110ctg7180001716897_943_SAG   | 49215148 |
| 25_4111ctg7180001811615_5463_SAG  | 49226655 |
| 25_4112ctg7180001811615_3300_SAG  | 49228818 |
| 25_4113ctg7180001214739_215_SAG   | 49285585 |
| 25_4114ctg7180001623302_1695_SAC  | 49293072 |
| 25_4115ctg7180001623302_1291_SCT  | 49293476 |
| 25_4116ctg7180001623302_78_SCT    | 49294689 |
| 25_4117ctg7180001525824_1233_SAG  | 49310856 |
| 25_4118ctg7180001827443_962_SCT   | 49332481 |
| 25_4119ctg7180001341866_170_SAC   | 49355879 |
| 25_4120ctg7180001843336_6324_SCT  | 49363904 |
| 25_4121ctg7180001843336_6051_SAC  | 49364177 |
| 25_4122ctg7180001819588_4042_SCT  | 49394933 |
| 25_4123ctg7180001884889_1043_SAG  | 49423815 |
| 25_4124ctg7180001712405_1795_SCT  | 49449260 |
| 25_4125ctg7180001841245_3610_SAC  | 49467038 |
| 25_4126ctg7180001825280_1428_SAG  | 49471584 |

|                                   |          |
|-----------------------------------|----------|
| 25_4127ctg7180001626876_2452_SCT  | 49500268 |
| 25_4128ctg7180001891134_1034_SAC  | 49527617 |
| 25_4129ctg7180001366224_973_SAG   | 49538958 |
| 25_4130ctg7180001917264_14363_SAG | 49560287 |
| 25_4131ctg7180001917264_14500_SGT | 49560424 |
| 25_4132ctg7180001814595_506_SGT   | 49565640 |
| 25_4133ctg7180001814595_2045_SAT  | 49567179 |
| 25_4134ctg7180001814595_2066_SCT  | 49567200 |
| 25_4135ctg7180001814595_2525_SCT  | 49567661 |
| 25_4136ctg7180001814595_2986_SAG  | 49568120 |
| 25_4137ctg7180001814595_5888_SAC  | 49570935 |
| 25_4138ctg7180001814595_5899_SGT  | 49570946 |
| 25_4139ctg7180001814595_5998_SAG  | 49571045 |
| 25_4140ctg7180001814595_6958_SAG  | 49572005 |
| 25_4141ctg7180001491120_2156_SAG  | 49578527 |
| 25_4142ctg7180001491120_7824_SGT  | 49584195 |
| 25_4143ctg7180001491120_9110_SGT  | 49585481 |
| 25_4144ctg7180001491120_10291_SAG | 49586662 |
| 25_4145ctg7180001269258_2007_SGT  | 49589296 |
| 25_4146ctg7180001811388_2581_SAC  | 49629403 |
| 25_4147ctg7180001868124_713_SGT   | 49638873 |
| 25_4148ctg7180001685805_289_SCT   | 49667892 |
| 25_4149ctg7180001361709_951_SAG   | 49698931 |
| 25_4150ctg7180001911886_2474_SAG  | 49708078 |
| 25_4151ctg7180001915126_1285_SAG  | 49787367 |
| 25_4152ctg7180001878294_520_SAG   | 49794951 |
| 25_4153ctg7180001487266_255_SCT   | 49797979 |
| 25_4154ctg7180001842376_1175_SAG  | 49831828 |
| 25_4155ctg7180001842376_622_SAG   | 49832381 |
| 25_4156ctg7180001842376_382_SAG   | 49832621 |
| 25_4157ctg7180001270103_322_SAG   | 49879734 |
| 25_4158ctg7180001801173_950_SAC   | 49883141 |
| 25_4159ctg7180001838469_4267_SAC  | 49981559 |
| 25_4160ctg7180001838469_5161_SGT  | 49982453 |
| 25_4161ctg7180001825251_3007_SCT  | 50026867 |

|                                  |          |
|----------------------------------|----------|
| 25_4162ctg7180001889743_2295_SCT | 50135597 |
| 25_4163ctg7180001896375_1326_SAG | 50179106 |
| 25_4164ctg7180001728229_239_SAC  | 50231415 |
| 25_4165ctg7180001381762_254_SGT  | 50236469 |
| 25_4166ctg7180001836461_6587_SAG | 50262191 |
| 25_4167ctg7180001836461_4213_SGT | 50264565 |
| 25_4168ctg7180001906699_3412_SAG | 50304322 |
| 25_4169ctg7180001921136_7797_SCT | 50352356 |
| 25_4170ctg7180001277566_179_SAC  | 50368376 |
| 25_4171ctg7180001856283_1341_SAG | 50396144 |
| 25_4172ctg7180001858674_5334_SCT | 50455036 |
| 25_4173ctg7180001203968_852_SAG  | 50504436 |
| 25_4174ctg7180001929167_4678_SAC | 50542855 |
| 25_4175ctg7180001904375_1222_SAG | 50562122 |
| 25_4176ctg7180001929116_553_SGT  | 50567164 |
| 25_4177ctg7180001929116_611_SCT  | 50567222 |
| 25_4178ctg7180001906729_2356_SCT | 50591708 |
| 25_4179ctg7180001920247_3175_SAC | 50623278 |
| 25_4180ctg7180001903104_6211_SAG | 50638861 |
| 25_4181ctg7180001884028_2884_SAG | 50725536 |
| 25_4182ctg7180001933753_748_SGT  | 50739941 |
| 25_4183ctg7180001532938_952_SCT  | 50743170 |
| 25_4184ctg7180001267313_1354_SGT | 50777157 |
| 25_4185ctg7180001267313_1276_SCT | 50777235 |
| 25_4186ctg7180001267313_1269_SAG | 50777242 |
| 25_4187ctg7180001453709_1157_SGT | 50841185 |
| 25_4188ctg7180001453709_1044_SCT | 50841298 |
| 25_4189ctg7180001600782_509_SAC  | 50871474 |
| 25_4190ctg7180001600782_618_SAG  | 50871583 |
| 25_4191ctg7180001922367_3207_SAC | 50889163 |
| 25_4192ctg7180001376918_1787_SCT | 50904786 |
| 25_4193ctg7180001877963_2464_SAC | 50916084 |
| 25_4194ctg7180001282041_58_SAG   | 50922856 |
| 25_4195ctg7180001282041_111_SCT  | 50922909 |
| 25_4196ctg7180001900824_130_SAG  | 50932193 |

|                                  |          |
|----------------------------------|----------|
| 25_4197ctg7180001854194_3183_SGT | 50962078 |
| 25_4198ctg7180001894459_2585_SAG | 50973310 |
| 25_4199ctg7180001905834_497_SGT  | 50985614 |
| 25_4200ctg7180001810098_4621_SCT | 50989159 |
| 25_4201ctg7180001906048_2041_SAG | 51014461 |
| 25_4202ctg7180001906048_3492_SAG | 51015912 |
| 25_4203ctg7180001697667_1101_SCT | 51061714 |
| 25_4204ctg7180001340116_83_SGT   | 51075638 |
| 25_4205ctg7180001816334_3883_SGT | 51108559 |
| 25_4206ctg7180001401133_271_SGT  | 51121409 |
| 25_4207ctg7180001921810_6909_SAC | 51204262 |
| 25_4208ctg7180001921810_6746_SAG | 51204425 |
| 25_4209ctg7180001921810_6714_SAG | 51204457 |
| 25_4210ctg7180001921810_5051_SAC | 51207162 |
| 25_4211ctg7180001823555_414_SAG  | 51245590 |
| 25_4212ctg7180001902995_176_SAG  | 51300446 |
| 25_4213ctg7180001822285_5090_SCT | 51306624 |
| 25_4214ctg7180001892442_4529_SAC | 51365809 |
| 25_4215ctg7180001826865_2141_SAC | 51387502 |
| 25_4216ctg7180001662629_4067_SGT | 51402760 |
| 25_4217ctg7180001806503_8245_SAC | 51413910 |

---
